# Supplementary material for: Efficient Synthesis of Benzothiazinone Analogues with Activity against Intracellular Mycobacterium tuberculosis
Source: PubMed Central journal article supplement — ChemMedChem. 2021 Dec 23;17(6):e202100733. doi: 10.1002/cmdc.202100733 (PMC9303563; doi:10.1002/cmdc.202100733), 2021-12-23

# ChemMedChem

Supporting Information

## **Efficient Synthesis of Benzothiazinone Analogues with Activity against Intracellular *Mycobacterium tuberculosis***

Adrian Richter, Gagandeep Narula, Ines Rudolph, Rüdiger W. Seidel, Christoph Wagner, Yossef Av-Gay, and Peter Imming\*

**Synthetic materials and methods** All chemicals were purchased from Sigma Aldrich, Alfa Aesar, VWR, Carl Roth, Fisher Scientific or Acros Organics and were used without further purification. All organic solvents, piperidine, 2,6-dimethylpiperidine, TEA (triethylamine), and DIPEA (*N,N*-diisopropylethylamine) were distilled prior use and stored with molecular sieve 3 Å. All solids were dried in a glass oven (Büchi TO-51, Büchi Labortechnik, Flawil, Switzerland) at 60 °C, 20 mbar for 60-120 min prior to use. The notation hexane in the description of the syntheses refers to *n*-hexane. Column chromatography was carried out using Merck silica gel 60 (63-200 µm). Flash chromatography was performed on a puriFlash® 430 instrument (Interchim, Montluçon, France). Prepacked columns with silica gel (30 µm) were used. The maximum compound load per column was 5 % (m/m) of the silica gel quantity. NMR spectra were recorded on an Agilent Technologies VNMRS 400 MHz spectrometer. Chemical shifts are reported relative to the residual solvent signal (CDCl<sub>3</sub> δ<sub>H</sub> = 7.26 ppm; δ<sub>C</sub> = 77.10 ppm; CD<sub>3</sub>OD δ<sub>H</sub> = 3.31 ppm; DMSO-*d*<sub>6</sub> δ<sub>H</sub> = 2.50 ppm). Abbreviations: s = singlet, bs = broad singlet, d = doublet, dd = doublet of doublets, m = multiplet. ESI mass spectra were measured on a Thermo Finnigan LCQ Classic spectrometer and high-resolution mass spectra (HRMS) were recorded on a Thermo Fisher Scientific LTQ Orbitrap XL mass spectrometer. APCI mass spectra were measured with an Advion expression<sup>s</sup> compact mass spectrometer. Electron impact (EI) mass spectra were recorded on an AMD 402 of AMD Intectra GmbH. Final compounds were confirmed to be of >95% purity based on HPLC. Purity was measured by UV absorbance at 254 nm. The HPLC consists of an XTerra RP18 column (3.5 µm, 3.9 mm × 100 mm) from the manufacturer Waters (Milford, MA, USA) and two LC-10AD pumps, a SPD-M10A VP PDA detector, and a SIL-HT autosampler, all from the manufacturer Shimadzu (Kyoto, Japan). The mobile phase was a gradient of methanol/ water (starting at 95% water going to 5% water) with 0.05 % TFA.

*General procedure A - Synthesis of aromatic carboxylic acid chlorides* The aromatic carboxylic acid is dissolved in toluene and after addition of  $\text{SOCl}_2$  (2 eq.) heated for 2 h under reflux. The solvent is then removed under vacuum and the carboxylic acid chloride produced is used for the next reaction step without further work-up.

*General procedure B - Synthesis of thioureas with thiocarbonyldiimidazole* Thiocarbonyldiimidazole is dissolved in THF in a single-neck flask, the amine is added as solution in THF. The reaction mixture is stirred for 2 h at room temperature, followed by heating to 55 °C for 1 h. After the reaction is complete, 2/3 of the THF volume is removed under vacuum, 2 M ammonia solution in MeOH (2-5 eq. ammonia) is added and the flask is sealed tightly. After 15 h reaction at room temperature, the addition of the 2 M ammonia (2-5 eq. ammonia) solution is repeated and the mixture is heated to 50 °C for 8 h. The solvent is removed under vacuum and the thiourea can be purified by column chromatography or by recrystallisation from isopropanol/diisopropyl ether (1:1).

*General procedure C - Synthesis of benzothiazinones by the thiourea pathway* The thiourea prepared according to general procedure B is added to toluene in a multi-neck flask and the suspension is heated to 70 °C whereby the thiourea dissolves. The carboxylic acid chloride, prepared according to general procedure A, is also dissolved in toluene and this solution is slowly added to the warm solution of thiourea by a dropping funnel. After complete addition of the acid chloride, heat the reaction mixture for 1 h under reflux and leave it overnight at room temperature.

*General procedure D - Synthesis of piperazine monoamides* Piperazine (3-5 eq.) and PyBOP® (1.15 eq.) are dissolved in DMF and slowly added to a solution of the corresponding carboxylic acid in DMF. The reaction mixture is stirred overnight, then the solvent is removed under vacuum.

*General procedure E Synthesis of thioureas with NaSCN* Dry NaSCN was suspended in acetone and cooled to 5 °C. An equimolar amount of benzoylchloride was dissolved in acetone and added dropwise. Subsequently, the mixture was stirred for 2 h at 5 °C. Equimolar amounts of the corresponding amine were dissolved in acetone, added dropwise at approx. 10 °C and the mixture stirred for 2 h at rt. After evaporation of the solvent, the residue was suspended in a small amount (approx. 4-8 eq.) of conc. HCl and heated to 90 °C for 1 h. After carefully neutralizing the mixture with conc. NH<sub>3</sub>, the product was collected after precipitation via setting aside the mixture for 48 h at 8 °C or extracting the mixture with chloroform and subsequent flash chromatography of the combined organic layers.

*General procedure F Synthesis of thioureas with trimethylsilylisoithiocyanate* To a solution of the secondary (1 eq.) amine in dried THF trimethylsilylisoithiocyanate (2 eq.) was added and stirred for 48 h. The solvent was removed under vacuum and a 2-propanol/water mixture (9:1) was added to the residue. The reaction mixture was boiled for a few seconds and the hot solution mixture was filtered. The flask and filter were washed twice with acetone. The filtrate was evaporated and the product was recrystallized from isopropanol/ diisopropyl ether (1:2).

*tert*-Butylpiperazine-1-carboxylate (**1a**) For the synthesis of **1a**, piperazine (2000 mg, 23.26 mmol, 1.0 eq.) and triethylamine (4.837 ml, 34.90 mmol, 1.5 eq.) are dissolved in MeOH (20 ml), to which di-*tert*-butyl dicarbonate (2028 mg, 9.30 mmol, 0.4 eq.) is added slowly. The reaction mixture is then stirred at room temperature overnight. After completion of the reaction, the solvent is removed at the rotary evaporator and the crude product is purified by column chromatography (chloroform/MeOH 9:1). After purification the title compound is isolated as a colourless oil (1486 mg, 86 %). <sup>1</sup>H-NMR (400 MHz, CDCl<sub>3</sub>) δ 3.36 (t, CH<sub>2</sub>-N(CO)-CH<sub>2</sub>, <sup>2</sup>J = 5.1 Hz, 4H), 2.78 (t, CH<sub>2</sub>-NH-CH<sub>2</sub>, <sup>2</sup>J = 5.1 Hz, 4H), 1.74 (bs, CH<sub>2</sub>-NH-CH<sub>2</sub>, 1H), 1.44 (s, *t*-butyl, 9H) MS (ESI) *m/z* 187.36 [M+H<sup>+</sup>]

4-Carbamothioylpiperazine-1-carboxylate (**1b**) Compound **1b** is prepared by general procedure B, using *tert*-butylpiperazine-1-carboxylate (**1a**) (0.341 g, 1.83 mmol, 1.0 eq.) and thiocarbonyldiimidazole (0.376 g, 2.11 mmol, 1.15 eq.). Purification is carried out by MPLC (chloroform/MeOH gradient) and the title compound is isolated as a white solid (310 mg 69 %). <sup>1</sup>H-NMR (400 MHz, CD<sub>3</sub>OD) δ 3.83 (m, CH<sub>2</sub>-N-CH<sub>2</sub>, 4H), 3.48 (m, CH<sub>2</sub>-NH-CH<sub>2</sub>, 4H), 1.47 (s, *t*-butyl, 9H) MS (ESI) *m/z* 268.41 [M+Na<sup>+</sup>]

*tert*-Butyl 4-[8-nitro-4-oxo-6-(trifluoromethyl)-4H-1,3-benzothiazin-2-yl]piperazin-1-carboxylate (**1c**) 2-Chloro-3-nitro-5-(trifluoromethyl)benzoic acid chloride is prepared from 2-chloro-3-nitro-5-(trifluoromethyl)benzoic acid (2.250 g, 8.4 mmol, 1.1 eq.) by general procedure A. **1c** is synthesised by general procedure C, using 4-carbamothioylpiperazine-1-carboxylate (**1b**) (1.863 g, 7.6 mmol, 1.0 eq.) and adding DIPEA (3.878 ml, 22.8 mmol, 3.0 eq.). Purification is carried out by MPLC (Puriflash system, EtAc/heptane gradient). The title compound is isolated as yellow solid (3000 mg 86 %, HPLC purity 99.9 %, *t<sub>R</sub>* = 14.3 min). <sup>1</sup>H-NMR (400 MHz, CDCl<sub>3</sub>) δ 9.09 (d, Ar-H, <sup>4</sup>J = 2.2 Hz, 1H), 8.76 (d, Ar-H, <sup>4</sup>J = 2.2 Hz, 1H), 4.01 (bs, CH<sub>2</sub>-N-CH<sub>2</sub>, 4H), 3.61 (bs, CH<sub>2</sub>-N-CH<sub>2</sub>, 4H), 1.49 (s, *t*-butyl, 9H) <sup>13</sup>C-NMR (100 MHz, CDCl<sub>3</sub>) δ

166.1, 162.5, 154.2, 143.8, 133.7, 133.3 (q,  $^3J_{C,F}$  = 3.8 Hz), 129.7 (q,  $^2J_{C,F}$  = 35.9 Hz), 126.6, 126.0 (q,  $^3J_{C,F}$  = 3.8 Hz), 122.1 (q,  $^1J_{C,F}$  = 273.1 Hz), 80.9, 46.1, 43.0, 28.5 HRMS  $m/z$  calc for  $C_{18}H_{20}F_3N_4O_5S$  [M+H<sup>+</sup>], 461.1103; found, 461.1079, calc for  $C_{18}H_{19}F_3N_4O_5SNa$  [M+Na<sup>+</sup>], 483.0921; found, 483.0896.

*8-Nitro-2-(piperazin-1-yl)-6-(trifluoromethyl)-4H-1,3-benzothiazin-4-one (1d)* Compound **(1c)** (150 mg, 0.33 mmol, 1.0 eq.) is dissolved in a mixture of 0.5 ml DCM and 0.5 ml TFA and stirred for 1 h at room temperature. The solvent is removed under vacuum and the reaction mixture is co-evaporated three times each with toluene and chloroform. Compound **1d** is isolated as a pale-yellow solid (106 mg 91 %) and used for the next reaction step without further purification. <sup>1</sup>H-NMR (400 MHz, CD<sub>3</sub>OD) δ 8.88 (s, Ar-H, 1H), 8.84 (s, Ar-H, 1H), 4.29 (bs, CH<sub>2</sub>-N-CH<sub>2</sub>, 4H), 3.49 (t, CH<sub>2</sub>-NH<sub>2</sub><sup>+</sup>-CH<sub>2</sub>,  $^3J$  = 5.3 Hz, 4H) MS (ESI)  $m/z$  361.63 [M+H<sup>+</sup>]

*8-Nitro-2-(4-octanoylpiperazin-1-yl)-6-(trifluoromethyl)-4H-1,3-benzothiazin-4-on (1e)* For the synthesis of **1e**, caprylic acid (0.048 g, 0.33 mmol, 1.0 eq.) is dissolved in 10 ml DCM. DIPEA (0.166 ml, 0.98 mmol, 3.0 eq.), PyBOP® (0.198 g, 0.38 mmol, 1.15 eq.) and 8-nitro-2-(piperazin-1-yl)-6-(trifluoromethyl)-4H-1,3-benzothiazin-4-one (**1d**) (0.117 g, 0.33 mmol, 1.0 eq.) dissolved in 5 ml DCM are added to the reaction mixture. The mixture is then left overnight at room temperature and the solvent is removed *in vacuo*. Purification is carried out by MPLC (EtAc/Heptane gradient) and the title compound is isolated as a yellow solid (106 mg 59 %, HPLC purity 98.9 %,  $t_R$  = 15.2 min). <sup>1</sup>H-NMR (400 MHz, CDCl<sub>3</sub>) δ 9.08 (d, Ar-H,  $^4J$  = 2.0 Hz, 1H), 8.76 (d, Ar-H,  $^4J$  = 2.0 Hz, 1H), 4.03 (m, CH<sub>2</sub>-N-CH<sub>2</sub>, 4H), 3.81 (bs, CH<sub>2</sub>-N-CH<sub>2</sub>, 2H), 3.65 (bs, CH<sub>2</sub>-N-CH<sub>2</sub>, 2H), 2.36 (t, CO-CH<sub>2</sub>,  $^3J$  = 7.6 Hz, 2H), 1.64 (m, CH<sub>2</sub>, 2H), 1.30 (m, CH<sub>2</sub>, 8H), 0.88 (m, CH<sub>3</sub>-CH<sub>2</sub>, 3H) <sup>13</sup>C-NMR (100 MHz, CDCl<sub>3</sub>) δ 172.0, 166.2, 162.7, 143.9, 133.6, 133.5 (q,  $^3J_{C,F}$  = 3.8 Hz), 130.0 (q,  $^2J_{C,F}$  = 35.1 Hz), 126.6, 126.1 (q,  $^3J_{C,F}$  = 3.8 Hz), 122.2 (q,  $^1J_{C,F}$  = 273.1 Hz), 46.2, 46.0,

44.7, 40.8, 33.2, 31.7, 29.3, 29.0, 25.1, 22.6, 14.0 HRMS  $m/z$  calc for  $C_{21}H_{26}F_3N_4O_4S$   $[M+H]^+$ , 487.1622; found, 487.1594.

**8-(Nitro-2-(4-octadecanoylpiperazin-1-yl)-6-(trifluoromethyl)-4H-1,3-benzothiazin-4-one (2a)**

For the synthesis of **2a**, stearic acid (0.062 g, 0.22 mmol, 1.0 eq.) is dissolved in 10 ml DCM. DIPEA (0.110 ml, 0.65 mmol, 3.0 eq.), PyBOP® (0.130 g, 0.25 mmol, 1.15 eq.) and 8-nitro-2-(piperazin-1-yl)-6-(trifluoromethyl)-4H-1,3-benzothiazin-4-one (**1d**) (0.078 g, 0.22 mmol, 1.0 eq.), dissolved in 5 ml DCM, are added to the reaction mixture. The mixture is then left overnight at room temperature and the solvent is removed *in vacuo*. Purification is carried out by MPLC (EtAc/Heptane gradient) and the title compound is isolated as a yellow solid (71 mg 52 %, HPLC purity 94.7 %,  $t_R$  = 19.2 min).  $^1H$ -NMR (500 MHz,  $CDCl_3$ )  $\delta$  9.10 (d, Ar-H,  $^4J$  = 2.0 Hz, 1H), 8.78 (d, Ar-H,  $^4J$  = 2.0 Hz, 1H), 4.05 (m,  $CH_2$ -N- $CH_2$ , 4H), 3.82 (bs,  $CH_2$ -N- $CH_2$ , 2H), 3.66 (bs,  $CH_2$ -N- $CH_2$ , 2H), 2.37 (t, CO- $CH_2$ ,  $^3J$  = 7.6 Hz, 2H), 1.65 (m,  $CH_2$ , 2H), 1.29 (m,  $CH_2$ , 28H), 0.87 (m,  $CH_3$ - $CH_2$ , 3H)  $^{13}C$ -NMR (100 MHz,  $CDCl_3$ )  $\delta$  172.2, 166.3, 162.8, 143.9, 133.6, 133.5 (q,  $^3J_{C,F}$  = 3.8 Hz), 130.0 (q,  $^2J_{C,F}$  = 35.1 Hz), 126.5, 126.2 (q,  $^3J_{C,F}$  = 3.8 Hz), 122.2 (q,  $^1J_{C,F}$  = 273.1 Hz), 46.2, 46.0, 44.7, 40.8, 33.2, 31.9, 29.7, 29.6, 29.5, 29.4, 29.3, 25.1, 22.6, 14.1 HRMS  $m/z$  calc for  $C_{31}H_{46}F_3N_4O_4S$   $[M+H]^+$ , 627.3187; found, 627.3177, calc for  $C_{31}H_{45}F_3N_4O_4SNa$   $[M+Na]^+$ , 649.3007; found, 649.2996.

**1-(Piperazin-1-yl)-2-propylpentan-1-one (3a)** The synthesis of **3a** is carried out according to general procedure D. For this, sodium valproate (0.100 g, 0.60 mmol, 1.0 eq.) and PyBOP® (0.359 g, 0.69 mmol, 1.15 eq.) are dissolved in DMF (10 ml). Then a solution of piperazine (0.259 g, 3.01 mmol, 5.0 eq.) in DMF (5 ml) is added. After 16 h at RT, the solvent is removed *in vacuo* and the product is purified by column chromatography (chloroform/MeOH/ammonia lsg. 36 % 90:10:1). The title compound is isolated as colourless oil (106 mg 84 %).  $^1H$ -NMR (400 MHz,  $CDCl_3$ )  $\delta$  3.58 (m,  $CH_2$ -N- $CH_2$ , 2H), 3.47 (m,  $CH_2$ -N- $CH_2$ , 2H), 2.78 (m,  $CH_2$ -N- $CH_2$ , 4H),

2.60 (m, CO-CH-(CH<sub>2</sub>)<sub>2</sub>, 1H), 2.00 (bs, NH, 1H), 1.58 (m, CH-CH<sub>2</sub>, 2H), 1.32 (m, CH-CH<sub>2</sub>, 2H), 1.20 (m, CH<sub>2</sub>-CH<sub>3</sub>, 4H), 0.82 (t, CH<sub>2</sub>-CH<sub>3</sub>, <sup>3</sup>J = 7.3 Hz, 6H) MS (APCI) *m/z* 213.2 [M+H<sup>+</sup>].

*4-(2-Propylpentanoyl)piperazin-1-thiourea (3b)* **3b** is prepared by general procedure B, using 1-(piperazin-1-yl)-2-propylpentan-1-one (**3a**) (0.106 g, 0.50 mmol, 1.0 eq.) and thiocarbonyldiimidazole (0.102 g, 0.58 mmol, 1.15 eq.). Purification is carried out by MPLC (heptane gradient) and the product is isolated as a white solid (98 mg 72 %). <sup>1</sup>H-NMR (400 MHz, CDCl<sub>3</sub>) δ 6.23 (bs, NH<sub>2</sub>, 2H), 4.03 (bs, CH<sub>2</sub>-N-CH<sub>2</sub>, 2H), 3.73 (bs, CH<sub>2</sub>-N-CH<sub>2</sub>, 4H), 3.66 (bs, CH<sub>2</sub>-N-CH<sub>2</sub>, 2H), 2.62 (m, CO-CH-(CH<sub>2</sub>)<sub>2</sub>, 1H), 1.58 (m, CH-CH<sub>2</sub>, 2H), 1.38 (m, CH-CH<sub>2</sub>, 2H), 1.22 (m, CH<sub>2</sub>-CH<sub>3</sub>, 4H), 0.86 (t, CH<sub>2</sub>-CH<sub>3</sub>, <sup>3</sup>J = 7.2 Hz, 6H) MS (APCI) *m/z* 272.2 [M+H<sup>+</sup>].

*8-Nitro-2-[4-(2-propylpentanoyl)piperazin-1-yl]-6-(trifluoromethyl)-4H-1,3-benzothiazin-4-one (3c)* 2-Chloro-3-nitro-5-(trifluoromethyl)benzoic acid chloride is prepared from 2-chloro-3-nitro-5-(trifluoromethyl)benzoic acid (0.055 g, 0.20 mmol, 1.1 eq.) by general procedure A. **3c** is synthesised by general procedure C, using 4-(2-propylpentanoyl)piperazine-1-thiourea (**3b**) (0.050 g, 0.19 mmol, 1.0 eq.). Purification is carried out by MPLC (EtAc/heptane gradient) and the title compound is isolated as a yellow amorphous substance (84 mg 91 % HPLC purity 95.2 %, *t<sub>R</sub>* = 14.8 min). <sup>1</sup>H-NMR (400 MHz, CDCl<sub>3</sub>) δ 9.09 (d, Ar-H, <sup>4</sup>J = 2.2 Hz, 1H), 8.77 (d, Ar-H, <sup>4</sup>J = 2.2 Hz, 1H), 4.07 (bs, CH<sub>2</sub>-N-CH<sub>2</sub>, 2H), 3.98 (bs, CH<sub>2</sub>-N-CH<sub>2</sub>, 2H), 3.86 (bs, CH<sub>2</sub>-N-CH<sub>2</sub>, 2H), 3.74 (bs, CH<sub>2</sub>-N-CH<sub>2</sub>, 2H), 2.67 (m, CH<sub>2</sub>-CH-CH<sub>2</sub>, 1H), 1.65 (m, CH-CH<sub>2</sub>, 2H), 1.43 (m, CH-CH<sub>2</sub>, 2H), 1.27 (m, CH<sub>2</sub>-CH<sub>3</sub>, 4H), 0.89 (t, CH<sub>2</sub>-CH<sub>3</sub>, <sup>3</sup>J = 7.2 Hz, 6H) <sup>13</sup>C-NMR (100 MHz, CDCl<sub>3</sub>) δ 175.2, 166.2, 162.7, 143.9, 133.6, 133.5 (q, <sup>3</sup>J<sub>C,F</sub> = 3.8 Hz), 130.0 (q, <sup>2</sup>J<sub>C,F</sub> = 35.1 Hz), 126.6, 126.1 (q, <sup>3</sup>J<sub>C,F</sub> = 3.8 Hz), 122.3 (q, <sup>1</sup>J<sub>C,F</sub> = 273.1 Hz), 46.4, 46.2, 44.8, 41.0, 40.7, 35.2, 20.8, 14.2 HRMS *m/z* calc for C<sub>31</sub>H<sub>45</sub>F<sub>3</sub>N<sub>4</sub>O<sub>4</sub>SNa [M+Na<sup>+</sup>], 509.1445; found, 509.1450.

*Ethyl-1-(piperazin-1-yl)hexan-1-on (4a)* The synthesis of **4a** is carried out according to general procedure D. For this, 2-ethylhexanoic acid (0.300 g, 2.08 mmol, 1.0 eq.) and PyBOP® (1.244



g, 2.39 mmol, 1.15 eq.) are dissolved in DMF (20 ml). Then a solution of piperazine (0.537 g, 6.25 mmol, 3.0 eq.) in DMF (10 ml) is added. After 16 h at room temperature, the solvent is removed in vacuo and the product is purified by column chromatography (chloroform/MeOH/ammonia 36 % 90:10:1) and the title compound is isolated as colourless oil (284 mg 69 %). <sup>1</sup>H-NMR (400 MHz, CDCl<sub>3</sub>) δ 3.57 (t, CH<sub>2</sub>-N-CH<sub>2</sub>, <sup>3</sup>J = 4.9 Hz, 2H), 3.46 (t, CH<sub>2</sub>-N-CH<sub>2</sub>, <sup>3</sup>J = 4.9 Hz, 2H), 2.76 (m, CH<sub>2</sub>-N-CH<sub>2</sub>, 4H), 2.49 (m, CH<sub>2</sub>-CH-CH<sub>2</sub>, 1H), 2.02 (bs, NH, 1H), 1.57 (m, CH-CH<sub>2</sub>, 2H), 1.37 (m, CH-CH<sub>2</sub>, 2H), 1.16 (m, CH<sub>2</sub>-CH<sub>2</sub>, 4H), 0.79 (m, CH<sub>2</sub>-CH<sub>3</sub>, 6H) MS *m/z* (APCI) 213.2 [M+H<sup>+</sup>].

*4-(2-Ethylhexanoyl)piperazin-1-thiourea (4b)* **4b** is prepared according general procedure B, using Ethyl-1-(piperazin-1-yl)hexan-1-on (**4a**) (0.170 g, 0.80 mmol, 1.0 eq.) and thiocarbonyldiimidazole (0.164 g, 0.92 mmol, 1.15 eq.). Purification is carried out by MPLC (EtAc/heptane gradient) and the title compound is isolated as a white solid (132 mg 61 %). <sup>1</sup>H-NMR (400 MHz, CD<sub>3</sub>OD) δ 3.95 (bs, CH<sub>2</sub>-N-CH<sub>2</sub>, 2H), 3.81 (bs, CH<sub>2</sub>-N-CH<sub>2</sub>, 2H), 3.74 (m, CH<sub>2</sub>-N-CH<sub>2</sub>, 2H), 3.71 (m, CH<sub>2</sub>-N-CH<sub>2</sub>, 2H), 2.76 (m, CH<sub>2</sub>-CH-CH<sub>2</sub>, 1H), 1.60 (m, CH-CH<sub>2</sub>, 2H), 1.48 (m, CH-CH<sub>2</sub>, 2H), 1.27 (m, CH<sub>2</sub>-CH<sub>3</sub>, 4H), 0.90 (t, CH<sub>2</sub>-CH<sub>3</sub>, <sup>3</sup>J = 7.0 Hz, 3H), 0.88 (t, CH<sub>2</sub>-CH<sub>3</sub>, <sup>3</sup>J = 7.4 Hz, 3H) MS *m/z* (APCI) 272.3 [M+H<sup>+</sup>].

*2-[4-(2-Ethylhexanoyl)piperazin-1-yl]-8-nitro-6-(trifluoromethyl)-4H-1,3-benzothiazin-4-one (4c)* 2-Chloro-3-nitro-5-(trifluoromethyl)benzoic acid chloride is prepared from 2-chloro-3-nitro-5-(trifluoromethyl)benzoic acid (0.109 g, 0.41 mmol, 1.1 eq.) by general procedure A. **4c** is synthesised by general procedure C, using 4-(2-ethylhexanoyl)piperazine-1-thiourea (**4b**) (0.100 g, 0.37 mmol, 1.0 eq.). The title compound is isolated by MPLC (EtAc/heptane gradient) (175 mg 97 %, HPLC purity 95.9 %, *t<sub>R</sub>* = 14.8 min). <sup>1</sup>H-NMR (400 MHz, CDCl<sub>3</sub>) δ 9.06 (d, Ar-H, <sup>4</sup>J = 1.8 Hz, 1H), 8.75 (d, Ar-H, <sup>4</sup>J = 1.8 Hz, 1H), 4.07 (bs, CH<sub>2</sub>-N-CH<sub>2</sub>, 2H), 3.97 (bs, CH<sub>2</sub>-N-CH<sub>2</sub>, 2H), 3.86 (bs, CH<sub>2</sub>-N-CH<sub>2</sub>, 2H), 3.73 (bs, CH<sub>2</sub>-N-CH<sub>2</sub>, 2H), 2.56 (m, CH<sub>2</sub>-CH-CH<sub>2</sub>, 1H), 1.65 (m, CH-CH<sub>2</sub>,

2H), 1.47 (m, CH-CH<sub>2</sub>, 2H), 1.23 (m, CH<sub>2</sub>-CH<sub>3</sub>, 4H), 0.87 (m, CH<sub>2</sub>-CH<sub>3</sub>, 6H) <sup>13</sup>C-NMR (100 MHz, CDCl<sub>3</sub>) δ 175.1, 166.2, 162.7, 143.9, 133.6, 133.4 (q, <sup>3</sup>J<sub>C,F</sub> = 3.1 Hz), 130.0 (q, <sup>2</sup>J<sub>C,F</sub> = 35.1 Hz), 126.6, 126.1 (q, <sup>3</sup>J<sub>C,F</sub> = 3.1 Hz), 122.3 (q, <sup>1</sup>J<sub>C,F</sub> = 273.1 Hz), 46.4, 46.2, 44.8, 42.7, 41.0, 32.8, 29.8, 25.8, 22.8, 13.9, 12.0 HRMS *m/z* calc for C<sub>21</sub>H<sub>26</sub>F<sub>3</sub>N<sub>4</sub>O<sub>4</sub>S [M+H<sup>+</sup>], 487.1623; found, 487.1603, calc for C<sub>21</sub>H<sub>25</sub>F<sub>3</sub>N<sub>4</sub>O<sub>4</sub>SNa [M+Na<sup>+</sup>], 509.1442; found, 509.1420.

*tert*-Butyl (*S*)-(4-methyl-1-oxo-1-(piperazin-1-yl)pentan-2-yl)carbamate (**5a**) The synthesis of **5a** is carried out according to general procedure D. *t*-Boc-leucine (0.233 g, 1.01 mmol, 1.0 eq.) and PyBOP<sup>®</sup> (0.604 g, 1.16 mmol, 1.15 eq.) are dissolved in DMF (15 ml). Then a solution of piperazine (0.260 g, 3.02 mmol, 3.0 eq.) in DMF (5 ml) is added. After 16 h at room temperature, the solvent is removed in vacuo and the product is purified by column chromatography (chloroform/MeOH/ammonia 36 % 90:10:1). The title compound is a colourless oil (251 mg 84 %). <sup>1</sup>H-NMR (400 MHz, CDCl<sub>3</sub>) δ 5.31 (d, NH, <sup>3</sup>J = 9.0 Hz, 1H), 4.60 (m, CO-CH-NH, 1H), 4.33 (bs, NH/H<sub>2</sub>O, 2H), 3.75 (m, CH<sub>2</sub>-N-CH<sub>2</sub>, 1H), 3.62 (m, CH<sub>2</sub>-N-CH<sub>2</sub>, 1H), 3.52 (m, CH<sub>2</sub>-N-CH<sub>2</sub>, 2H), 2.95 (m, CH<sub>2</sub>-N-CH<sub>2</sub>, 2H), 2.90 (m, CH<sub>2</sub>-N-CH<sub>2</sub>, 2H), 1.68 (m, CH<sub>3</sub>-CH-CH<sub>3</sub>, 1H), 1.43 (m, CH-CH<sub>2</sub>-CH, 2H), 1.40 (s, C-(CH<sub>3</sub>)<sub>3</sub>, 9H), 0.94 (d, CH<sub>3</sub>-CH-CH<sub>3</sub>, <sup>3</sup>J = 6.7 Hz, 3H), 0.89 (d, CH<sub>3</sub>-CH-CH<sub>3</sub>, <sup>3</sup>J = 6.7 Hz, 3H) MS *m/z* (APCI) 300.3 [M+H<sup>+</sup>].

*tert*-Butyl (*S*)-(1-(4-carbamothioylpiperazin-1-yl)-4-methyl-1-oxopentan-2-yl)carbamate (**5b**) Compound **5b** is prepared by general procedure B, using *tert*-butyl N-[4-methyl-1-oxo-1-(piperazin-1-yl)pentan-2-yl]carbamate (**5a**) (0.202 g, 0.68 mmol, 1.0 eq.) and thiocarbonyldiimidazole (0.138 g, 0.78 mmol, 1.15 eq.). The product is purified by column chromatography (chloroform/MeOH 95:5) as a white solid. <sup>1</sup>H-NMR (400 MHz, CDCl<sub>3</sub>) δ 6.25 (m, NH<sub>2</sub>, 2H), 5.25 (m, NH, 1H), 4.57 (m, CO-CH-NH, 1H), 4.07 (bs, CH<sub>2</sub>-N-CH<sub>2</sub>, 1H), 3.80 (bs, CH<sub>2</sub>-N-CH<sub>2</sub>, 5H), 3.55 (bs, CH<sub>2</sub>-N-CH<sub>2</sub>, 1H), 1.68 (m, CH<sub>3</sub>-CH-CH<sub>3</sub>, 1H), 1.45 (m, CH-CH<sub>2</sub>-CH, 2H),

1.39 (s, C-(CH<sub>3</sub>)<sub>3</sub>, 9H), 0.94 (d, CH<sub>3</sub>-CH-CH<sub>3</sub>, <sup>3</sup>J = 6.5 Hz, 3H), 0.90 (d, CH<sub>3</sub>-CH-CH<sub>3</sub>, <sup>3</sup>J = 6.6 Hz, 3H) MS *m/z* (ESI) 381.53 [M+Na<sup>+</sup>].

*tert*-Butyl (S)-(4-methyl-1-(4-(8-nitro-4-oxo-6-(trifluoromethyl)-4H-benzo[e][1,3]thiazin-2-yl)piperazin-1-yl)-1-oxopentan-2-yl)carbamate (5c) 2-Chloro-3-nitro-5-

(trifluoromethyl)benzoic acid chloride is prepared from 2-chloro-3-nitro-5-(trifluoromethyl)benzoic acid (0.114 g, 0.42 mmol, 1.1 eq.) by general procedure A. AR160 is synthesised by general procedure C, using *tert*-butyl N-[1-(4-carbamothioylpiperazin-1-yl)-4-methyl-1-oxopentan-2-yl]carbamate (5b) (0.138 g, 0.39 mmol, 1.0 eq.). Purification of the title compound is done by column chromatography (chloroform/MeOH 98:2) (170 mg 76 %, HPLC purity 99.2 %, *t<sub>R</sub>* = 14.8 min). <sup>1</sup>H-NMR (400 MHz, CDCl<sub>3</sub>) δ 9.08 (d, Ar-H, <sup>4</sup>J = 2.2 Hz, 1H), 8.76 (d, Ar-H, <sup>4</sup>J = 2.2 Hz, 1H), 5.15 (d, NH, <sup>3</sup>J = 9.0 Hz, 1H), 4.64 (m, CO-CH-NH, 1H), 4.25 (bs, CH<sub>2</sub>-N-CH<sub>2</sub>, 2H), 4.04 (m, CH<sub>2</sub>-N-CH<sub>2</sub>, 1H), 3.94 (bs, CH<sub>2</sub>-N-CH<sub>2</sub>, 2H), 3.85 (m, CH<sub>2</sub>-N-CH<sub>2</sub>, 1H), 3.59 (m, CH<sub>2</sub>-N-CH<sub>2</sub>, 2H), 1.70 (m, CH<sub>3</sub>-CH-CH<sub>3</sub>, 1H), 1.51 (m, CH-CH<sub>2</sub>-CH, 1H), 1.42 (s, C-(CH<sub>3</sub>)<sub>3</sub>, 9H), 1.39 (m, CH-CH<sub>2</sub>-CH, 1H), 0.97 (d, CH<sub>3</sub>-CH-CH<sub>3</sub>, <sup>3</sup>J = 6.5 Hz, 3H), 0.93 (d, CH<sub>3</sub>-CH-CH<sub>3</sub>, <sup>3</sup>J = 6.5 Hz, 3H) <sup>13</sup>C-NMR (100 MHz, CDCl<sub>3</sub>) δ 172.0, 166.2, 162.7, 155.6, 143.9, 133.6, 133.5 (q, <sup>3</sup>J<sub>C,F</sub> = 3.8 Hz), 130.0 (q, <sup>2</sup>J<sub>C,F</sub> = 35.9 Hz), 126.6, 126.1 (q, <sup>3</sup>J<sub>C,F</sub> = 3.8 Hz), 122.3 (q, <sup>1</sup>J<sub>C,F</sub> = 273.1 Hz), 80.0, 48.4, 46.0, 44.8, 42.4, 41.5, 28.3, 24.7, 23.2, 22.0 HRMS *m/z* calc for C<sub>24</sub>H<sub>30</sub>F<sub>3</sub>N<sub>5</sub>O<sub>6</sub>Na [M+Na<sup>+</sup>], 596.1763; found, 596.1735.

2-(4-(L-Leucyl)piperazin-1-yl)-8-nitro-6-(trifluoromethyl)-4H-benzo[e][1,3]thiazin-4-one (5d)

(47 mg, 0.08 mmol, 1.0 eq.) is dissolved in a mixture of 1 ml DCM and 1 ml TFA and left for 1 h at room temperature. The solvent is removed under vacuum and the reaction mixture is co-evaporated three times each with toluene and chloroform. The crude product is purified by column chromatography (chloroform/MeOH/ammonia 36 % 95:5:1) and the title compound is a yellow amorphous substance (31 mg 80 %, HPLC purity 97.4 %, *t<sub>R</sub>* = 13.7 min). <sup>1</sup>H-NMR

(400 MHz, CDCl<sub>3</sub>):  $\delta$  = 9.09 (d, Ar-H,  $^4J$  = 2.0 Hz, 1H), 8.77 (d, Ar-H,  $^4J$  = 2.2 Hz, 1H), 4.04 (m, CH<sub>2</sub>-N-CH<sub>2</sub>, 5H), 3.76 (m, CH-NH<sub>2</sub>, 1H), 3.73 (bs, CH<sub>2</sub>-N-CH<sub>2</sub>, 2H), 3.64 (bs, CH<sub>2</sub>-N-CH<sub>2</sub>, 1H), 1.86 (m, CH<sub>3</sub>-CH-CH<sub>3</sub>, 1H), 1.40 (m, CH-CH<sub>2</sub>, 2H), 0.96 (dd, CH<sub>3</sub>-CH-CH<sub>3</sub>,  $^3J$  = 6.7 Hz, 6H) <sup>13</sup>C-NMR (100 MHz, CDCl<sub>3</sub>):  $\delta$  = 174.6, 166.2, 162.8, 143.9, 133.6, 133.5 (q,  $^3J_{C,F}$  = 3.8 Hz), 129.1 (q,  $^2J_{C,F}$  = 35.1 Hz), 126.6, 126.2 (q,  $^3J_{C,F}$  = 3.8 Hz), 122.3 (q,  $^1J_{C,F}$  = 273.1 Hz), 49.7, 46.0, 44.8, 44.4, 41.4, 24.7, 23.5, 21.6 HRMS  $m/z$  calc for C<sub>19</sub>H<sub>23</sub>F<sub>3</sub>N<sub>5</sub>O<sub>4</sub>S [M+H<sup>+</sup>], 474.1419; found, 474.1413.

*4-[[tert-Butoxy]carbonyl]amino}butanoic acid (6a)* For the synthesis of **6a**,  $\gamma$ -aminobutyric acid (1000 mg, 9.70 mmol, 1.0 eq.) and di-tert-butyl dicarbonate (2538 mg, 11.64 mmol, 1.2 eq.) are dissolved in THF (10 ml). To this solution a solution of NaHCO<sub>3</sub> (1076 mg, 12.80 mmol, 1.32 eq.) in water (10 ml) is added under ice cooling. The reaction mixture is then left at room temperature overnight. For work-up, the pH of the mixture is adjusted to 2 with 1 N HCl and the product is extracted with DCM (twice). The organic phases are collected and, after drying, concentrated over Na<sub>2</sub>SO<sub>4</sub> in vacuo. The product - colourless oil - obtained is used without further purification (1453 mg 94 %). <sup>1</sup>H-NMR (400 MHz, CDCl<sub>3</sub>)  $\delta$  4.68 (bs, COOH, 1H), 3.75 (m, NH, 1H), 3.18 (bs, NH-CH<sub>2</sub>H), 2.39 (t, CO-CH<sub>2</sub>,  $^3J$  = 7.4 Hz, 2H), 1.82 (m, CH<sub>2</sub>-CH<sub>2</sub>-CH<sub>2</sub>, 2H), 1.52 (s, CH<sub>3</sub>, 9H) MS  $m/z$  (ESI) 202.30 [M-H<sup>+</sup>].

*tert-Butyl N-[4-oxo-4-(piperazin-1-yl)butyl]carbamate (6b)* The synthesis of **6b** is carried out according to general procedure D by dissolving 4-[[tert-butoxy]carbonyl]amino}butanoic acid (**6a**) (1.453 g, 7.16 mmol, 1.0 eq.) and PyBOP<sup>®</sup> (4.282 g, 8.23 mmol, 1.15 eq.) in DMF (25 ml). Then a solution of piperazine (1.850 g, 21.47 mmol, 3.0 eq.) in DMF (10 ml) is added. After 16 h at room temperature the solvent is removed *in vacuo* and the product - a colourless oil - is purified by column chromatography (chloroform/MeOH/ammonia 36 % 90:10:1) (450 mg 23 %). <sup>1</sup>H-NMR (400 MHz, CDCl<sub>3</sub>)  $\delta$  4.90 (bs, NH, 1H), 3.56 (m, CH<sub>2</sub>-N-CH<sub>2</sub>, 2H), 3.41 (m, CH<sub>2</sub>-N-CH<sub>2</sub>, 4H), 3.12 (q, NH-CH<sub>2</sub>,  $^3J$  = 6.5 Hz, 2H), 2.83 (m, CH<sub>2</sub>-N-CH<sub>2</sub>, 4H), 2.77 (bs, NH, 1H), 2.32 (t,

CO-CH<sub>2</sub>, <sup>3</sup>J = 7.2 Hz, 2H), 1.78 (qi, CH<sub>2</sub>-CH<sub>2</sub>-CH<sub>2</sub>, <sup>3</sup>J = 7.0 Hz, 2H), 1.39 (s, CH<sub>3</sub>, 9H) MS *m/z* (ESI) 294.18 [M+Na<sup>+</sup>].

*tert*-Butyl *N*-[4-(4-carbamothioylpiperazin-1-yl)-4-oxobutyl]carbamate (**6c**) Compound **6c** is prepared by general procedure B, using *tert*-butyl *N*-[4-oxo-4-(piperazin-1-yl)butyl]carbamate (**6b**) (0.420 g, 1.55 mmol, 1.0 eq.) and thiocarbonyldiimidazole (0.318 g, 1.78 mmol, 1.15 eq.). The product - a white solid - is purified by column chromatography (chloroform/MeOH 9:1) (359 mg 70 %) <sup>1</sup>H-NMR (400 MHz, CDCl<sub>3</sub>) δ 5.85 (bs, NH<sub>2</sub>, 2H), 4.72 (bs, NH, 1H), 4.05 (bs, CH<sub>2</sub>-N-CH<sub>2</sub>, 2H), 3.75 (bs, CH<sub>2</sub>-N-CH<sub>2</sub>, 4H), 3.61 (bs, CH<sub>2</sub>-N-CH<sub>2</sub>, 2H), 3.18 (t, NH-CH<sub>2</sub>, <sup>3</sup>J = 6.6 Hz, 2H), 2.38 (t, CO-CH<sub>2</sub>, <sup>3</sup>J = 7.1 Hz, 2H), 1.85 (qi, CH<sub>2</sub>-CH<sub>2</sub>-CH<sub>2</sub>, <sup>3</sup>J = 6.8 Hz, 2H), 1.43, (s, CH<sub>3</sub>, 9H) MS *m/z* (ESI) 353.66 [M+Na<sup>+</sup>].

*tert*-Butyl *N*-(4-{4-[8-nitro-4-oxo-6-(trifluoromethyl)-4*H*-1,3-benzothiazin-2-yl]piperazin-1-yl}-4-oxobutyl)carbamate (**6d**) 2-Chloro-3-nitro-5-(trifluoromethyl)benzoic acid chloride is prepared from 2-chloro-3-nitro-5-(trifluoromethyl)benzoic acid (0.436 g, 1.62 mmol, 1.1 eq.) by general procedure A. **6d** is synthesised by general procedure C, using *tert*-butyl *N*-[4-(4-carbamothioylpiperazin-1-yl)-4-oxobutyl]carbamate (**6c**) (0.138 g, 0.39 mmol, 1.0 eq.). Purification is carried out by MPLC (chloroform/MeOH gradient) and the title compound is isolated as a yellow solid (195 mg 24 %, HPLC purity 95.4 %, *t*<sub>R</sub> = 13.7 min). <sup>1</sup>H-NMR (400 MHz, CDCl<sub>3</sub>) δ 9.08 (d, Ar-H, <sup>4</sup>J = 2.2 Hz, 1H), 8.76 (d, Ar-H, <sup>4</sup>J = 2.2 Hz, 1H), 4.73 (bs, NH, 1H), 4.04 (m, CH<sub>2</sub>-N-CH<sub>2</sub>, 4H), 3.82 (bs, CH<sub>2</sub>-N-CH<sub>2</sub>, 2H), 3.65 (bs, CH<sub>2</sub>-N-CH<sub>2</sub>, 2H), 3.18 (q, NH-CH<sub>2</sub>, <sup>3</sup>J = 6.5 Hz, 2H), 2.41 (t, CO-CH<sub>2</sub>, <sup>3</sup>J = 7.1 Hz, 2H), 1.83 (qi, CH<sub>2</sub>-CH<sub>2</sub>-CH<sub>2</sub>, <sup>3</sup>J = 6.8 Hz, 2H), 1.42, (s, CH<sub>3</sub>, 9H) <sup>13</sup>C-NMR (100 MHz, CDCl<sub>3</sub>) δ 171.3, 166.1, 162.7, 156.1, 143.9, 133.6, 133.6 (q, <sup>3</sup>J<sub>C,F</sub> = 3.1 Hz), 129.9 (q, <sup>2</sup>J<sub>C,F</sub> = 35.9 Hz), 126.5, 126.1 (q, <sup>3</sup>J<sub>C,F</sub> = 3.8 Hz), 122.3 (q, <sup>1</sup>J<sub>C,F</sub> = 273.1 Hz), 79.2, 46.1, 45.9, 44.6, 40.9, 40.1, 30.2, 28.4, 25.3 HRMS *m/z* calc for C<sub>22</sub>H<sub>26</sub>F<sub>3</sub>N<sub>5</sub>O<sub>6</sub>SNa [M+Na<sup>+</sup>], 568.1449; found, 568.1442.

*(S)*-*N*-(4-(Methylthio)-1-oxo-1-(piperazin-1-yl)butan-2-yl)acetamide (**7a**) The synthesis of **7a** is carried out according to general procedure D. For this, N-acetylcysteine (0.244 g, 1.50 mmol, 1.0 eq.) and PyBOP® (0.897 g, 1.73 mmol, 1.15 eq.) are dissolved in DMF (15 ml). Then a solution of piperazine (0.388 g, 4.50 mmol, 3.0 eq.) in DMF (5 ml) is added. After 16 h at room temperature, the solvent is removed *in vacuo* and the product is purified by column chromatography (chloroform/MeOH/ammonia 36 % 90:10:1). The title compound is isolated as a colourless oil (159 mg 41 %) <sup>1</sup>H-NMR (400 MHz, CD<sub>3</sub>OD) δ 6.67 (d, NH, <sup>3</sup>J = 8.0 Hz, 1H), 5.05 (m, CO-CH-NH, 1H), 3.56 (m, CH<sub>2</sub>-N-CH<sub>2</sub>, 1H), 2.85 (m, CH<sub>2</sub>-N-CH<sub>2</sub>, 1H), 2.47 (m, CH<sub>2</sub>-CH<sub>2</sub>-S, 2H), 2.06 (s, -CH<sub>3</sub>, 3H), 1.98 (s, -CH<sub>3</sub>, 3H), 1.95 (m, CH-CH<sub>2</sub>-CH<sub>2</sub>, 1H), 1.79 (m, CH-CH<sub>2</sub>-CH<sub>2</sub>, 1H) MS *m/z* (ESI) 260.64 [M+H<sup>+</sup>], 283.15 [M+Na<sup>+</sup>].

*(S)*-*N*-(1-(4-Carbamothioylpiperazin-1-yl)-4-(methylthio)-1-oxobutan-2-yl)acetamide (**7b**)

Compound **7b** is prepared by general procedure B, using N-[4-(methylsulfanyl)-1-oxo-1-(piperazin-1-yl)butan-2-yl]acetamide (**7a**) (0.159 g, 0.61 mmol, 1.0 eq.) and thiocarbonyldiimidazole (0.126 g, 0.71 mmol, 1.15 eq.). The purification is carried out by recrystallisation from DCM/hexane 1:1 and the title compound is a white solid (116 mg 60 %). <sup>1</sup>H-NMR (400 MHz, CD<sub>3</sub>OD) δ 4.98 (m, CO-CH-NH, 1H), 4.03 (m, CH<sub>2</sub>-N-CH<sub>2</sub>, 1H), 3.94 (m, CH<sub>2</sub>-N-CH<sub>2</sub>, 1H), 3.86 (m, CH<sub>2</sub>-N-CH<sub>2</sub>, 2H), 3.75 (m, CH<sub>2</sub>-N-CH<sub>2</sub>, 3H), 3.55 (m, CH<sub>2</sub>-N-CH<sub>2</sub>, 1H), 2.53 (m, CH<sub>2</sub>-CH<sub>2</sub>-S, 2H), 2.10 (s, -CH<sub>3</sub>, 3H), 1.99 (m, CH-CH<sub>2</sub>-CH<sub>2</sub>, 1H), 1.97 (s, -CH<sub>3</sub>, 3H), 1.90 (m, CH-CH<sub>2</sub>-CH<sub>2</sub>, 1H) MS *m/z* (ESI) 341.50 [M+Na<sup>+</sup>].

*(S)*-*N*-(4-(Methylthio)-1-(4-(8-nitro-4-oxo-6-(trifluoromethyl)-4H-benzo[e][1,3]thiazin-2-yl)piperazin-1-yl)-1-oxobutan-2-yl)acetamide (**7c**) 2-Chloro-3-nitro-5-(trifluoromethyl)benzoic acid chloride is prepared from 2-chloro-3-nitro-5-(trifluoromethyl)benzoic acid (0.093 g, 0.35 mmol, 1.1 eq.) by general procedure A. **7c** is synthesised by general procedure C, using N-[1-(4-carbamothioylpiperazin-1-yl)-4-(methylsulfanyl)-1-oxobutan-2-yl]acetamide (**7b**) (0.100 g,

0.31 mmol, 1.0 eq.). Purification is carried out by MPLC (EtAc/MeOH gradient) and the title compound is isolated as a yellow amorphous substance (73 mg 44 %, HPLC purity 100.0 %,  $t_R = 12.3$  min).  $^1\text{H-NMR}$  (400 MHz,  $\text{CDCl}_3$ )  $\delta$  9.04 (s, Ar-H, 1H), 8.74 (s, Ar-H, 1H), 6.66 (d, NH,  $^3J = 7.2$  Hz, 1H), 5.10 (m, CO-CH-NH, 1H), 4.18 (bs,  $\text{CH}_2\text{-N-CH}_2$ , 2H), 3.98 (m,  $\text{CH}_2\text{-N-CH}_2$ , 4H), 3.76 (m,  $\text{CH}_2\text{-N-CH}_2$ , 1H), 3.61 (m,  $\text{CH}_2\text{-N-CH}_2$ , 1H), 2.51 (m,  $\text{CH}_2\text{-S}$ , 2H), 2.07 (s,  $-\text{CH}_3$ , 3H), 1.99 (s,  $-\text{CH}_3$ , 3H), 1.98 (m, CH- $\text{CH}_2\text{-CH}_2$ , 1H), 1.87 (m,  $\text{CH}_2\text{-S}$ , 1H)  $^{13}\text{C-NMR}$  (100 MHz,  $\text{CDCl}_3$ )  $\delta$  175.1, 166.2, 162.7, 143.9, 133.6, 133.4 (q,  $^3J_{\text{C,F}} = 3.1$  Hz), 130.0 (q,  $^2J_{\text{C,F}} = 35.1$  Hz), 126.6, 126.1 (q,  $^3J_{\text{C,F}} = 3.1$  Hz), 122.3 (q,  $^1J_{\text{C,F}} = 273.1$  Hz), 46.4, 46.2, 44.8, 42.7, 41.0, 32.8, 29.8, 25.8, 22.8, 13.9, 12.0 HRMS  $m/z$  calc for  $\text{C}_{20}\text{H}_{23}\text{F}_3\text{N}_5\text{O}_5\text{S}_2$  [ $\text{M}+\text{H}^+$ ], 534.1089; found, 534.1062, calc for  $\text{C}_{20}\text{H}_{22}\text{F}_3\text{N}_5\text{O}_5\text{S}_2\text{Na}$  [ $\text{M}+\text{Na}^+$ ], 556.09118; found, 556.0881.

**2-[4-*rac*-(2-Methylpropyl)phenyl]-1-(piperazin-1-yl)propan-1-one (8a)** The synthesis of **8a** is carried out according to general procedure D by dissolving 2-[4-(2-methylpropyl)phenyl]propanoic acid (0.500 g, 2.42 mmol, 1.0 eq.) and PyBOP® (1.450 g, 2.79 mmol, 1.15 eq.) in DMF (10 ml). Then a solution of piperazine (0.626 g, 7.27 mmol, 3.0 eq.) in DMF (10 ml) is added. After 16 h at room temperature the solvent is removed *in vacuo* and the product is purified by column chromatography (chloroform/MeOH/ammonia 36 % 90:10:1) as a colourless oil (534 mg 80 %).  $^1\text{H-NMR}$  (400 MHz,  $\text{CDCl}_3$ )  $\delta$  7.06 (m, Ar-H, 4H), 6.88 (bs, NH, 1H), 3.94 (bs,  $\text{CH}_2\text{-N-CH}_2$ , 1H) 3.76 (q, CO-CH,  $^3J = 6.8$  Hz, 1H), 3.47 (m,  $\text{CH}_2\text{-N-CH}_2$ , 3H), 3.04 (bs,  $\text{CH}_2\text{-N-CH}_2$ , 1H), 2.85 (m,  $\text{CH}_2\text{-N-CH}_2$ , 2H), 2.40 (d,  $\text{CH}_2$ ,  $^3J = 7.2$  Hz, 2H), 2.34 (bs,  $\text{CH}_2\text{-N-CH}_2$ , 1H), 1.80 (n,  $\text{CH}_2\text{-CH-(CH}_3)_2$ ,  $^3J = 6.8$  Hz, 1H), 1.38 (d,  $\text{CH}_3\text{-CH}$ ,  $^3J = 6.8$  Hz, 3H), 0.85 (d,  $\text{CH}_3\text{-CH-CH}_3$ ,  $^3J = 6.7$  Hz, 6H) MS  $m/z$  (APCI) 275.2 [ $\text{M}+\text{H}^+$ ].

**4-{2-[4-*rac*-(2-Methylpropyl)phenyl]propanoyl}piperazin-1-thiourea (8b)** Compound **8b** is prepared by general procedure B, using 2-[4-(2-methylpropyl)phenyl]-1-(piperazin-1-yl)propan-1-one (**8a**) (0.534 g, 1.94 mmol, 1.0 eq.) and thiocarbonyldiimidazole (0.397 g, 2.23

mmol, 1.15 eq.). The product is recrystallised from isopropanol/diisopropyl ether (1:1) and the title compound is a white solid (407 mg 63 %). <sup>1</sup>H-NMR (400 MHz, CD<sub>3</sub>OD) δ 7.17 (d, Ar-H, <sup>3</sup>J = 8.2 Hz, 2H), 7.12 (d, Ar-H, <sup>3</sup>J = 8.2 Hz, 2H), 4.04 (q, CO-CH, <sup>3</sup>J = 6.8 Hz, 1H), 3.85 (m, CH<sub>2</sub>-N-CH<sub>2</sub>, 3H), 3.52 (m, CH<sub>2</sub>-N-CH<sub>2</sub>, 2H), 3.16 (m, CH<sub>2</sub>-N-CH<sub>2</sub>, 1H), 2.45 (d, CH<sub>2</sub>, <sup>3</sup>J = 7.2 Hz, 2H), 1.83 (n, CH<sub>2</sub>-CH-(CH<sub>3</sub>)<sub>2</sub>, <sup>3</sup>J = 6.8 Hz, 1H), 1.38 (d, CH<sub>3</sub>-CH, <sup>3</sup>J = 6.8 Hz, 3H), 0.88 (d, CH<sub>3</sub>-CH-CH<sub>3</sub>, <sup>3</sup>J = 6.7 Hz, 6H) MS *m/z* (ESI) 356.86 [M+H<sup>+</sup>].

*2-[4-{2-*rac*-[4-(2-Methylpropyl)phenyl]propanoyl}piperazin-1-yl]-8-nitro-6-(trifluoromethyl)-4H-1,3-benzothiazin-4-one* (**8c**) 2-Chloro-3-nitro-5-(trifluoromethyl)benzoic acid chloride is prepared from 2-chloro-3-nitro-5-(trifluoromethyl)benzoic acid (0.133 g, 0.50 mmol, 1.1 eq.) by general procedure A. Compound **8c** is synthesised by general procedure C, using 4-{2-[4-(2-methylpropyl)phenyl]propanoyl}piperazine-1-thiourea (**8b**) (0.138 g, 0.39 mmol, 1.0 eq.). Purification is carried out by MPLC (EtAc/heptane gradient) and the title compound is isolated as a yellow solid (207 mg 84 %, HPLC purity 98.9 %, *t<sub>R</sub>* = 15.9 min). <sup>1</sup>H-NMR (400 MHz, CDCl<sub>3</sub>) δ 9.07 (d, Ar-H, <sup>4</sup>J = 2.0 Hz, 1H), 8.76 (d, Ar-H, <sup>4</sup>J = 2.0 Hz, 1H), 7.14 (d, Ar-H, <sup>3</sup>J = 8.4 Hz, 2H), 7.11 (d, Ar-H, <sup>3</sup>J = 8.4 Hz, 2H), 4.15 (bs, CH<sub>2</sub>-N-CH<sub>2</sub>, 3H), 3.84 (q, CO-CH, <sup>3</sup>J = 6.8 Hz, 1H), 3.60 (m, CH<sub>2</sub>-N-CH<sub>2</sub>, 2H), 3.48 (m, CH<sub>2</sub>-N-CH<sub>2</sub>, 2H), 3.06 (bs, CH<sub>2</sub>-N-CH<sub>2</sub>, 1H), 2.44 (d, CH<sub>2</sub>, <sup>3</sup>J = 7.2 Hz, 2H), 1.84 (n, CH<sub>2</sub>-CH-(CH<sub>3</sub>)<sub>2</sub>, <sup>3</sup>J = 6.8 Hz, 1H), 1.47 (d, CH<sub>3</sub>-CH, <sup>3</sup>J = 6.8 Hz, 3H), 0.88 (dd, CH<sub>3</sub>-CH-CH<sub>3</sub>, <sup>3</sup>J = 6.5 Hz, 6H) <sup>13</sup>C-NMR (100 MHz, CDCl<sub>3</sub>) δ 172.5, 166.1, 162.5, 143.9, 140.8, 138.5, 133.6, 133.4 (q, <sup>3</sup>J<sub>C,F</sub> = 3.8 Hz), 130.0, 129.9 (q, <sup>2</sup>J<sub>C,F</sub> = 35.1 Hz), 126.8, 126.6, 126.1 (q, <sup>3</sup>J<sub>C,F</sub> = 3.8 Hz), 122.3 (q, <sup>1</sup>J<sub>C,F</sub> = 273.1 Hz), 46.1, 45.6, 44.9, 44.8, 43.4, 41.4, 30.1, 22.3, 20.5 HRMS *m/z* calc for C<sub>26</sub>H<sub>28</sub>F<sub>3</sub>N<sub>4</sub>O<sub>4</sub>S [M+H<sup>+</sup>], 549.1779; found, 549.1764, calc for C<sub>26</sub>H<sub>26</sub>F<sub>3</sub>N<sub>4</sub>O<sub>4</sub>SNa [M+Na<sup>+</sup>], 571.1599; found, 571.1583.

*2-[4-[(2S)-2-[4-(2-Methylpropyl)phenyl]propanoyl]piperazin-1-yl]-8-nitro-6-(trifluoromethyl)-4H-1,3-benzothiazin-4-one* (**9a**) For the synthesis of **9a**, (2S)-2-[4-(2-



methylpropyl)phenyl]propanoic acid (0.068 g, 0.33 mmol, 1.0 eq.) is dissolved in 10 ml DCM. DIPEA (0.166 ml, 0.98 mmol, 3.0 eq.), PyBOP® (0.198 g, 0.38 mmol, 1.15 eq.) and 8-nitro-2-(piperazin-1-yl)-6-(trifluoromethyl)-4H-1,3-benzothiazin-4-one (**1d**) (0.117 g, 0.33 mmol, 1.0 eq.) dissolved in 5 ml DCM are added to the reaction mixture. The mixture is then left overnight at room temperature and the solvent is removed *in vacuo*. Purification is carried out by MPLC (EtAc/Heptane gradient). The title compound is a yellow solid (164 mg 91 %, HPLC purity 97.4 %,  $t_R = 15.9$  min).  $^1\text{H-NMR}$  (400 MHz,  $\text{CDCl}_3$ )  $\delta$  9.06 (d, Ar-H,  $^4J = 2.0$  Hz, 1H), 8.75 (d, Ar-H,  $^4J = 2.0$  Hz, 1H), 7.14 (d, Ar-H,  $^3J = 8.2$  Hz, 2H), 7.11 (d, Ar-H,  $^3J = 8.2$  Hz, 2H), 4.15 (m,  $\text{CH}_2\text{-N-CH}_2$ , 3H), 3.84 (q, CO-CH,  $^3J = 6.8$  Hz, 1H), 3.61 (m,  $\text{CH}_2\text{-N-CH}_2$ , 2H), 3.48 (m,  $\text{CH}_2\text{-N-CH}_2$ , 2H), 3.06 (bs,  $\text{CH}_2\text{-N-CH}_2$ , 1H), 2.43 (d,  $\text{CH}_2$ ,  $^3J = 7.2$  Hz, 2H), 1.84 (n,  $\text{CH}_2\text{-CH-(CH}_3)_2$ ,  $^3J = 6.8$  Hz, 1H), 1.46 (d,  $\text{CH}_3\text{-CH}$ ,  $^3J = 6.8$  Hz, 3H), 0.87 (d,  $\text{CH}_3\text{-CH-CH}_3$ ,  $^3J = 6.7$  Hz, 6H)  $^{13}\text{C-NMR}$  (100 MHz,  $\text{CDCl}_3$ )  $\delta$  172.5, 166.1, 162.5, 143.9, 140.8, 138.5, 133.6, 133.4 (q,  $^3J_{\text{C,F}} = 3.8$  Hz), 130.0, 129.9 (q,  $^2J_{\text{C,F}} = 35.1$  Hz), 126.8, 126.6, 126.1 (q,  $^3J_{\text{C,F}} = 3.8$  Hz), 122.2 (q,  $^1J_{\text{C,F}} = 273.1$  Hz), 46.0, 45.6, 44.9, 44.8, 43.4, 41.4, 30.1, 22.3, 20.5 HRMS  $m/z$  calc for  $\text{C}_{26}\text{H}_{28}\text{F}_3\text{N}_4\text{O}_4\text{S}$  [ $\text{M}+\text{H}^+$ ], 549.1779; found, 549.1783, calc for  $\text{C}_{26}\text{H}_{27}\text{F}_3\text{N}_4\text{O}_4\text{SNa}$  [ $\text{M}+\text{Na}^+$ ], 571.1599; found, 571.1600.

**1-(4-Methylbenzenesulfonyl)piperazine (10a)** p-Toluenesulfonic acid chloride (0.500 g, 2.62 mmol, 1.0 eq.) is taken up in DMF (10 ml), added to a solution of piperazine (1.552 g, 13.05 mmol, 5.0 eq.) in DMF (20 ml) and stirred overnight (inert gas). The solvent is removed under vacuum and the crude product is purified by column chromatography (chloroform/MeOH/ammonia 36 % 90:10:1). The title compound is isolated as a colourless oil (458 mg 73 %).  $^1\text{H-NMR}$  (400 MHz,  $\text{CDCl}_3$ )  $\delta$  7.55 (dd, Ar-H,  $^3J = 8.4$  Hz,  $^4J = 2.0$  Hz 2H), 7.25 (d, Ar-H,  $^3J = 8.4$  Hz, 2H), 2.87 (m,  $\text{CH}_2\text{-N-CH}_2$ , 8H), 2.36 (s,  $\text{CH}_3$ , 3H) MS  $m/z$  (APCI) 241.1 [ $\text{M}+\text{H}^+$ ].

**4-(4-methylbenzenesulfonyl)piperazin-1-thiourea (10b)** Compound **10b** is prepared by general procedure B, using 1-(4-methylbenzenesulfonyl)piperazine (**10a**) (0.400 g, 1.66 mmol, 1.0 eq.)

and thiocarbonyldiimidazole (0.341 g, 1.19 mmol, 1.15 eq.). The product is recrystallised as a white solid from isopropanol/diisopropyl ether (1:1) (172 mg 35 %).  $^1\text{H-NMR}$  (400 MHz, DMSO- $d_6$ )  $\delta$  7.63 (d, Ar-H,  $^3J = 8.2$  Hz, 2H) 7.49 (bs,  $\text{NH}_2$ , 2H) 7.46 (d, Ar-H,  $^3J = 8.0$  Hz, 2H), 3.84 (bs,  $\text{CH}_2\text{-N-CH}_2$ , 4H), 2.84 (m,  $\text{CH}_2\text{-N-CH}_2$ , 4H), 2.41 (s,  $\text{CH}_3$ , 3H) MS  $m/z$  (ESI) 322.70 [ $\text{M}+\text{Na}^+$ ].

*2-[4-(4-Methylbenzenesulfonyl)piperazin-1-yl]-8-nitro-6-(trifluoromethyl)-4H-1,3-benzothiazin-4-one (10c)* 2-Chloro-3-nitro-5-(trifluoromethyl)benzoic acid chloride is prepared from 2-chloro-3-nitro-5-(trifluoromethyl)benzoic acid (0.149 g, 0.55 mmol, 1.1 eq.) by general procedure A. **10c** is synthesised by general method 3, using 4-[24-(4-methylbenzenesulfonyl)piperazine-1-thiourea (**10b**) (0.150 g, 0.50 mmol, 1.0 eq.). Purification is carried out by MPLC (EtAc/Heptane gradient). The title compound is isolated as a yellow solid (213 mg 86 %, HPLC purity 98.9 %,  $t_R = 14.0$  min)  $^1\text{H-NMR}$  (400 MHz,  $\text{CDCl}_3$ )  $\delta$  9.04 (d, Ar-H,  $^4J = 2.2$  Hz, 1H), 8.74 (d, Ar-H,  $^4J = 2.2$  Hz, 1H), 7.64 (d, Ar-H,  $^3J = 8.4$  Hz, 2H), 7.34 (d, Ar-H,  $^3J = 8.4$  Hz, 2H), 4.11 (bs,  $\text{CH}_2\text{-N-CH}_2$ , 4H), 3.17 (m,  $\text{CH}_2\text{-N-CH}_2$ , 4H), 2.42 (s,  $\text{CH}_3$ , 3H)  $^{13}\text{C-NMR}$  (100 MHz, DMSO- $d_6$ )  $\delta$  165.7, 162.5, 144.8, 144.4, 134.6, 132.3, 131.8 (q,  $^3J_{\text{C,F}} = 3.8$  Hz), 130.4, 128.0, 127.9 (q,  $^2J_{\text{C,F}} = 34.3$  Hz), 126.7 (q,  $^3J_{\text{C,F}} = 3.8$  Hz), 126.5, 123.0 (q,  $^1J_{\text{C,F}} = 273.7$  Hz), 45.8, 45.6, 21.4 HRMS  $m/z$  calc for  $\text{C}_{20}\text{H}_{18}\text{F}_3\text{N}_4\text{O}_5\text{S}_2$  [ $\text{M}+\text{H}^+$ ], 515.0667; found, 515.0665, calc for  $\text{C}_{20}\text{H}_{17}\text{F}_3\text{N}_4\text{O}_5\text{S}_2\text{Na}$  [ $\text{M}+\text{Na}^+$ ], 537.0486; found, 537.0483.

*1-(Heptane-1-sulfonyl)piperazine (11a)* Sodium-1-heptanesulfonate (1.50 g, 6.81 mmol, 1.0 eq.) is mixed with  $\text{POCl}_3$  (4.66 ml, 51.19 mol, 7.5 eq.) in a round bottom flask and heated to 100 °C for 1 h with vigorous stirring. Then cool the reaction mixture to 0 °C, add 10 ml toluene and 25 ml water. The organic phase is separated, washed twice with water and concentrated in vacuo after drying over  $\text{NaSO}_4$ . The acid chloride is taken up without further purification in DMF (15 ml), added to a solution of piperazine (4.05 g, 34.05 mmol, 5.0 eq.) in DMF (35 ml) and stirred overnight (inert gas). The solvent is removed under vacuum and the crude product

is worked up by column chromatography (chloroform/MeOH/ammonia 36 % 90:10:1). The product is isolated as a colourless oil (880 mg 65 %)  $^1\text{H-NMR}$  (400 MHz,  $\text{CDCl}_3$ )  $\delta$  3.23 (m,  $\text{CH}_2\text{-N-CH}_2$ , 4H), 2.91 (m,  $\text{CH}_2\text{-N-CH}_2$ , 4H), 2.86 (m,  $\text{SO}_2\text{-CH}_2$ , 2H), 2.34 (bs,  $\text{NH}$ , 1H), 1.78 (m,  $\text{CH}_2$ , 2H), 1.38 (m,  $\text{CH}_2$ , 2H), 1.26 (m,  $\text{CH}_2$ , 6H), 0.86 (m,  $\text{CH}_3$ , 3H) MS  $m/z$  (APCI) 249.2 [ $\text{M}+\text{H}^+$ ].

*4-(heptane-1-sulfonyl)piperazin-1-thiourea (11b)* Compound **11b** is prepared by general procedure B, using 1-(heptane-1-sulfonyl)piperazine (**11a**) (0.300 g, 1.21 mmol, 1.0 eq.) and thiocarbonyldiimidazole (0.248 g, 1.39 mmol, 1.15 eq.). Purification is carried out by MPLC (chloroform /MeOH gradient). The product is a white compound (311 mg 84 %).  $^1\text{H-NMR}$  (400 MHz,  $\text{CDCl}_3$ )  $\delta$  5.92 (bs,  $\text{NH}_2$ , 1H) 3.93 (m,  $\text{CH}_2\text{-N-CH}_2$ , 4H), 3.37 (t,  $\text{CH}_2\text{-N-CH}_2$ ,  $^3J = 5.1$  Hz, 4H), 2.92 (m,  $\text{SO}_2\text{-CH}_2$ , 2H), 1.79 (m,  $\text{CH}_2$ , 2H), 1.41 (m,  $\text{CH}_2$ , 2H), 1.29 (m,  $\text{CH}_2$ , 6H), 0.88 (m,  $\text{CH}_3$ , 3H) MS  $m/z$  (ESI) 330.85 [ $\text{M}+\text{Na}^+$ ].

*2-[4-(Heptane-1-sulfonyl)piperazine-1-yl]-8-nitro-6-(trifluoromethyl)-4H-1,3-benzothiazin-4-one (11c)* 2-Chloro-3-nitro-5-(trifluoromethyl)benzoic acid chloride is prepared from 2-chloro-3-nitro-5-(trifluoromethyl)benzoic acid (0.145 g, 0.54 mmol, 1.1 eq.) by general procedure A. Compound **11c** is synthesised by general procedure C, using 4-(heptane-1-sulfonyl)piperazine-1-thiourea (**11b**) (0.150 g, 0.49 mmol, 1.0 eq.). Purification is carried out by MPLC (EtAc/heptane gradient). The title compound is slightly yellow (234 mg 91 %, HPLC purity 99.5 %,  $t_R = 15.1$  min).  $^1\text{H-NMR}$  (400 MHz,  $\text{CDCl}_3$ )  $\delta$  9.09 (d, Ar-H,  $^4J = 2.2$  Hz, 1H), 8.78 (d, Ar-H,  $^4J = 2.2$  Hz, 1H), 4.12 (bs,  $\text{CH}_2\text{-N-CH}_2$ , 4H), 3.47 (m,  $\text{CH}_2\text{-N-CH}_2$ , 4H), 2.95 (m,  $\text{SO}_2\text{-CH}_2$ , 2H), 1.81 (m,  $\text{CH}_2$ , 2H), 1.42 (m,  $\text{CH}_2$ , 2H), 1.29 (m,  $\text{CH}_2$ , 6H), 0.88 (m,  $\text{CH}_3$ , 3H)  $^{13}\text{C-NMR}$  (100 MHz,  $\text{CDCl}_3$ )  $\delta$  166.3, 162.7, 143.9, 133.5 (q,  $^3J_{\text{C,F}} = 3.8$  Hz), 133.4, 130.1 (q,  $^2J_{\text{C,F}} = 35.9$  Hz), 126.6, 126.2 (q,  $^3J_{\text{C,F}} = 3.8$  Hz), 122.3 (q,  $^1J_{\text{C,F}} = 273.1$  Hz), 50.4, 46.5, 45.4, 31.4, 28.7, 28.3, 23.1, 22.5, 14.0 HRMS  $m/z$  calc for  $\text{C}_{20}\text{H}_{26}\text{F}_3\text{N}_4\text{O}_5\text{S}_2$  [ $\text{M}+\text{H}^+$ ], 523.1292; found, 523.1279, calc for  $\text{C}_{20}\text{H}_{25}\text{F}_3\text{N}_4\text{O}_5\text{SNa}$  [ $\text{M}+\text{Na}^+$ ], 545.1112; found, 545.1098.

*Pyrrolidine-1-thiourea (12a)* Compound **12a** is prepared by general procedure B, using pyrrolidine (0.450 g, 6.33 mmol, 1.0 eq.) and thiocarbonyldiimidazole (1.300 g, 7.28 mmol, 1.15 eq.). The crude product is worked up by column chromatography (chloroform/MeOH 98:2). The title compound is a white solid (187 mg 21 %). <sup>1</sup>H-NMR (400 MHz, CDCl<sub>3</sub>) δ 5.71 (bs, NH<sub>2</sub>, 2H), 3.82 (bs, N-CH<sub>2</sub>, 2H), 3.38 (bs, N-CH<sub>2</sub>, 2H), 2.07 (bs, CH<sub>2</sub>-CH<sub>2</sub>, 2H), 1.95 (bs, CH<sub>2</sub>-CH<sub>2</sub>, 2H) MS *m/z* (APCI) 131.1 [M+H<sup>+</sup>].

*8-Nitro-2-(pyrrolidine-1-yl)-6-(trifluoromethyl)-4H-1,3-benzothiazin-4-one (12b)* 2-Chloro-3-nitro-5-(trifluoromethyl)benzoic acid chloride is prepared from 2-chloro-3-nitro-5-(trifluoromethyl)benzoic acid (0.210 g, 0.77 mmol, 1.1 eq.) by general procedure A. Compound **12b** is synthesised by general procedure C, using pyrrolidine-1-thiourea (**12a**) (0.100 g, 0.70 mmol, 1.0 eq.). The crude product is worked up by column chromatography (LM chloroform) and washed with diisopropyl ether. The title compound is isolated a yellow solid (85 mg 34 %, HPLC purity 99.1 %, *t<sub>R</sub>* = 13.5 min). <sup>1</sup>H-NMR (400 MHz, CDCl<sub>3</sub>) δ 9.17 (d, Ar-H, <sup>4</sup>*J* = 2.2 Hz, 1H), 8.77 (d, Ar-H, <sup>4</sup>*J* = 2.2 Hz, 1H), 3.93 (t, CH<sub>2</sub>-N-CH<sub>2</sub>, <sup>3</sup>*J* = 6.9 Hz, 2H), 3.70 (t, CH<sub>2</sub>-N-CH<sub>2</sub>, <sup>3</sup>*J* = 6.9 Hz, 2H), 2.19 (qi, CH<sub>2</sub>-CH<sub>2</sub>, <sup>3</sup>*J* = 6.9 Hz, 2H), 2.06 (bs, CH<sub>2</sub>-CH<sub>2</sub>, <sup>3</sup>*J* = 6.9 Hz, 2H) <sup>13</sup>C-NMR (100 MHz, CDCl<sub>3</sub>) δ 165.9, 160.3, 143.5, 134.6, 133.7 (q, <sup>3</sup>*J*<sub>C,F</sub> = 3.8 Hz), 129.5 (q, <sup>2</sup>*J*<sub>C,F</sub> = 35.9 Hz), 126.9, 125.8 (q, <sup>3</sup>*J*<sub>C,F</sub> = 3.8 Hz), 122.4 (q, <sup>1</sup>*J*<sub>C,F</sub> = 273.1 Hz), 50.4, 47.4, 25.5, 24.1 HRMS *m/z* calc for C<sub>13</sub>H<sub>11</sub>F<sub>3</sub>N<sub>3</sub>O<sub>3</sub>S [M+H<sup>+</sup>], 346.0469; found, 346.0461.

#### *Piperidine-1-thiourea (13a)*

*Synthesis by procedure B* Compound **13a** is prepared by general procedure B, using piperidine (1.000 g, 11.74 mmol, 1 eq.) and thiocarbonyldiimidazole (2.406 g, 13.50 mmol, 1.15 eq.). The crude product is purified by column chromatography (chloroform/MeOH 98:2) and the title compound is isolated as a white solid (723 mg 43 %).

*Synthesis by procedure E* Synthesis according to general procedure E, starting from piperidine (4.95 ml, 50 mmol). Work-up after neutralization: the mixture was kept at 8 °C for 48 h, the brown oil which settled on the bottom of the flask was separated and purified by flash chromatography twice (eluent chloroform). The fractions containing the product were combined, the solvent evaporated and the remaining crude product treated with a few ml of toluene. A white precipitate formed, which was filtered off and dried (611 mg 9 %).

*Synthesis by procedure F* Synthesis according to general procedure F, starting from piperidine (49 mg, 0.57 mmol, 1 eq.). Compound **13a** was isolated as a slightly brownish solid (30 mg, 36 %)

<sup>1</sup>H-NMR (400 MHz, CD<sub>3</sub>OD) δ 3.78 (bs, CH<sub>2</sub>-N-CH<sub>2</sub>, 4H), 1.67 (m, CH<sub>2</sub>, 2H), 1.61 (m, CH<sub>2</sub>, 4H) MS *m/z* (ESI) 145.09 [M+H<sup>+</sup>].

*8-Nitro-2-(piperidine-1-yl)-6-(trifluoromethyl)-4H-1,3-benzothiazin-4-one (13b)* 2-Chloro-3-nitro-5-(trifluoromethyl)benzoic acid chloride is prepared from 2-chloro-3-nitro-5-(trifluoromethyl)benzoic acid (1.116 g, 4.14 mmol, 1.0 eq.) by general procedure A. Compound **13b** is synthesised by general procedure C, using piperidine-1-thiourea (**13a**) (0.597 g, 4.14 mmol, 1.0 eq.). The crude product is processed by column chromatography (chloroform) and the titel compound appears as a yellow solid (1105 mg 74 %, HPLC purity 96.2 %, *t<sub>R</sub>* = 14.1 min). <sup>1</sup>H-NMR (400 MHz, CDCl<sub>3</sub>) δ 9.09 (d, Ar-H, <sup>4</sup>*J* = 2.5 Hz, 1H), 8.74 (d, Ar-H, <sup>4</sup>*J* = 2.5 Hz, 1H), 3.97 (bs, N-CH<sub>2</sub>, 4H), 1.77 (m, CH<sub>2</sub>-CH<sub>2</sub>-CH<sub>2</sub>, 6H) <sup>13</sup>C NMR (126 MHz, CDCl<sub>3</sub>) δ 166.6, 161.5, 143.9, 134.3, 133.3 (q, <sup>3</sup>*J*<sub>C,F</sub> = 3.5 Hz), 129.5 (d, <sup>2</sup>*J*<sub>C,F</sub> = 35.3 Hz), 126.7, 125.9 (q, <sup>3</sup>*J*<sub>C,F</sub> = 3.6 Hz), 122.4 (q, <sup>1</sup>*J*<sub>C,F</sub> = 272.5 Hz), 47.9, 26.0, 24.3 MS *m/z* (APCI) 360.2 [M+H<sup>+</sup>].

*2-(2,6-Dimethylpiperidin-1-yl)-8-nitro-6-(trifluoromethyl)-4H-1,3-benzothiazin-4-one (14a)* 2-Chloro-3-nitro-5-(trifluoromethyl)benzoic acid chloride is prepared from 2-chloro-3-nitro-5-(trifluoromethyl)benzoic acid (0.500 g, 1.86 mmol, 1.0 eq.) by general procedure A. The 2-

chloro-3-nitro-5-(trifluoromethyl)benzoic acid chloride is dissolved in acetone (5 ml) and added to a suspension of KSCN (0.181 g, 1.86 mmol, 1.0 eq.) in acetone (10 ml) at 5 °C under inert gas. The reaction mixture is stirred for 2 h at 5-10 °C. Dimethylpiperidine (0.210 g, 1.86 mmol, 1 eq.) is then dissolved in acetone (5 ml) and added via a dropping funnel. After the addition is completed, the temperature is kept at 5-10 °C for another 2 h. Subsequently, solvent is removed *in vacuo* and the reaction product is worked up by column chromatography (DCM). The title compound appears as a yellow solid (340 mg 47 %, HPLC purity 100.0 %,  $t_R = 15.0$  min).  $^1\text{H-NMR}$  (400 MHz,  $\text{CDCl}_3$ )  $\delta$  9.09 (s, Ar-H, 1H), 8.73 (s, Ar-H, 1H), 5.48, (bs, CH-CH<sub>3</sub>, 1H), 4.61 (bs, CH-CH<sub>3</sub>, 1H), 1.95 (m, CH<sub>2</sub>, 1H), 1.77 (bs, CH-CH<sub>3</sub>, 4H), 1.66 (bs, CH-CH<sub>3</sub>, 1H), 1.41 (bs, CH-CH<sub>3</sub>, 6H)  $^{13}\text{C NMR}$  (101 MHz,  $\text{CDCl}_3$ )  $\delta$  166.2, 161.9, 144.0, 134.7, 133.2 (q,  $^3J_{\text{C,F}} = 3.5$  Hz), 129.4 (q,  $^2J_{\text{C,F}} = 35.4$  Hz), 126.9, 125.8 (q,  $^3J_{\text{C,F}} = 3.8$  Hz), 122.5 (q,  $^1J_{\text{C,F}} = 273.6$  Hz), 50.0, 49.0, 30.5, 29.76, 20.5, 19.9, 14.1. HRMS  $m/z$  calc for  $\text{C}_{16}\text{H}_{17}\text{F}_3\text{N}_3\text{O}_3\text{S}$  [ $\text{M}+\text{H}^+$ ], 388.0938; found, 388.0933.

**4-Hydroxypiperidin-1-thiourea (15a)** Compound **15a** is prepared by general procedure B, using 3-hydroxypiperidine (0.285 g, 2.82 mmol, 1 eq.) and thiocarbonyldiimidazole (0.580 g, 3.25 mmol, 1.15 eq.). The crude product is worked up column chromatographically (chloroform/MeOH 9:1) and the final compound is isolated as a white solid (206 mg 52 %).  $^1\text{H-NMR}$  (400 MHz,  $\text{CDCl}_3$ )  $\delta$  4.41 (m, cyclohexyl, 1H), 4.09 (m, cyclohexyl, 1H), 3.66 (m, cyclohexyl, 1H), 3.33 (m, cyclohexyl, 1H), 3.14 (m, cyclohexyl, 1H), 1.98 (m, cyclohexyl, 1H), 1.80 (m, cyclohexyl, 1H), 1.51 (m, cyclohexyl, 2H) MS  $m/z$  (ESI) 159.15 [ $\text{M}-\text{H}^+$ ].

**2-(4-Hydroxypiperidine-1-yl)-8-nitro-6-(trifluoromethyl)-4H-1,3-benzothiazin-4-one (15b)** 2-Chloro-3-nitro-5-(trifluoromethyl)benzoic acid chloride is prepared from 2-chloro-3-nitro-5-(trifluoromethyl)benzoic acid (AR96) (0.168 g, 0.63 mmol, 1.0 eq.) by general procedure A. Compound **15b** is prepared by general procedure C, using 4-hydroxypiperidine-1-thiourea

**(15a)** (0.100 g, 0.63 mmol, 1 eq.). The crude product is worked up by column chromatography (chloroform/MeOH 9:1) and recrystallised from EtAc/hexane (1:1). The title compound is isolated as a yellow solid (120 mg 51 %, HPLC purity 100.0 %,  $t_R$  = 12.5 min).  $^1\text{H-NMR}$  (400 MHz,  $\text{CDCl}_3$ )  $\delta$  9.06 (d, Ar-H,  $^4J$  = 1.6 Hz, 1H), 8.74 (s, Ar-H, 1H), 4.05 (m, cyclohexyl, OH, 5H), 2.66 (s, CH, 1H), 2.02 (m, cyclohexyl, 2H), 1.82 (m, cyclohexyl, 1H), 1.68 (m, cyclohexyl, 1H)  $^{13}\text{C-NMR}$  (100 MHz,  $\text{CDCl}_3$ )  $\delta$  166.7, 162.9, 143.9, 134.3, 133.2, 129.6 (q,  $^2J_{\text{C,F}}$  = 35.9 Hz), 126.5, 126.0, 122.3 (q,  $^1J_{\text{C,F}}$  = 273.1 Hz), 65.9, 52.9, 47.5, 31.9, 22.0. HRMS  $m/z$  calc for  $\text{C}_{14}\text{H}_{13}\text{F}_3\text{N}_3\text{O}_4\text{S}$   $[\text{M}+\text{H}^+]$ , 376.0575; found, 376.0575.

*Thiomorpholin-4-thiourea* (**16a**) Dried NaSCN (389 mg, 4.80 mmol, 1.0 eq.) is suspended in acetone (10 ml), placed under argon and cooled to 5 °C. Benzoyl chloride (0.675 ml, 4.80 mmol, 1.0 eq.) is added slowly and the reaction mixture is stirred for 3 h at 5 °C. Thiomorpholine (500 mg, 4.80 mmol, 1.0 eq.) dissolved in acetone (5 ml) is then added at 12 °C, after which the reaction mixture is stirred at RT for 4 h. After the reaction, the solvent is removed *in vacuo* and the residue is dissolved in 36 % HCl (7.0 ml) and heated to 95 °C for 1.5 h. The aqueous solution is then mixed with acetone (7.0 ml) and solution is then neutralised with ammonia 36 % and extracted three times with DCM. The organic phases are collected, dried with  $\text{MgSO}_4$  and the evaporated on a rotary evaporator. The crude product is purified by column chromatography (EtAc/Heptane 1:1). The title compound is a white solid (270 mg 35 %).  $^1\text{H-NMR}$  (400 MHz,  $\text{CDCl}_3$ )  $\delta$  6.48 (bs,  $\text{NH}_2$ , 2H), 4.11 (s,  $\text{CH}_2\text{-N-CH}_2$ , 4H), 2.74 (m,  $\text{CH}_2\text{-S-CH}_2$ , 4H) MS  $m/z$  (APCI) 163.0  $[\text{M}+\text{H}^+]$ .

*8-Nitro-2-(thiomorpholin-4-yl)-6-(trifluoromethyl)-4H-1,3-benzothiazin-4-one* (**16b**) 2-Chloro-3-nitro-5-(trifluoromethyl)benzoic acid chloride is prepared from 2-chloro-3-nitro-5-(trifluoromethyl)benzoic acid (0.332 g, 1.23 mmol, 1.0 eq.) by general procedure A. **16b** is synthesised by general procedure C, using thiomorpholine-4-thiourea (**16a**) (0.200 g, 1.23

mmol, 1.0 eq.). The crude product is purified by recrystallisation from acetone (260 mg 56 %).

$^1\text{H-NMR}$  (400 MHz,  $\text{CDCl}_3$ )  $\delta$  9.10 (d, Ar-H,  $^4J = 1.6$  Hz, 1H), 8.77 (d, Ar-H,  $^4J = 1.6$  Hz, 1H), 4.31 (bs,  $\text{CH}_2\text{-N-CH}_2$ , 4H), 2.81 (m,  $\text{CH}_2\text{-S-CH}_2$ , 4H) MS  $m/z$  (APCI) 378.1  $[\text{M}+\text{H}^+]$ .

*8-Nitro-2-(1-oxo-1 $\lambda^4$ ,4-thiomorpholin-4-yl)-6-(trifluoromethyl)-4H-1,3-benzothiazin-4-one*

**(16c)**  $\text{NaIO}_4$  (0.06 mg, 0.28 mmol, 1.05 eq.) is dissolved in 15 ml water and cooled to 0 °C with the aid of an ice bath. Now 8-nitro-2-(thiomorpholin-4-yl)-6-(trifluoromethyl)-4H-1,3-benzothiazin-4-one (**16b**) dissolved in 5 ml MeOH is added, the reaction mixture is left at 0 °C for 4 h and then kept in the refrigerator for 65 h. Subsequently the aqueous phase is extracted three times with chloroform, the organic phases are collected, dried with  $\text{MgSO}_4$  and the solvent is removed *in vacuo*. The crude product is purified by column chromatography (chloroform/MeOH 95:5). The title compound appears as a yellow solid (67 mg 64 %, HPLC purity 99.9 %,  $t_R = 11.0$  min).  $^1\text{H-NMR}$  (400 MHz,  $\text{CDCl}_3$ )  $\delta$  9.11 (d, Ar-H,  $^4J = 2.2$  Hz, 1H), 8.80 (d, Ar-H,  $^4J = 2.2$  Hz, 1H), 4.59 (bs,  $\text{CH}_2\text{-N-CH}_2$ , 4H), 3.04 (m,  $\text{CH}_2\text{-S-CH}_2$ , 2H), 2.81 (m,  $\text{CH}_2\text{-S-CH}_2$ , 2H)  $^{13}\text{C-NMR}$  (100 MHz,  $\text{CDCl}_3$ ):  $\delta = 166.3, 162.4, 144.0, 133.6$  (q,  $^2J_{\text{C,F}} = 3.8$  Hz), 133.3, 130.3 (q,  $^2J_{\text{C,F}} = 35.3$  Hz), 126.8, 126.4 (q,  $^3J_{\text{C,F}} = 3.8$  Hz), 121.4 (q,  $^1J_{\text{C,F}} = 273.7$  Hz), 45.4, 37.4. HRMS  $m/z$  calc for  $\text{C}_{13}\text{H}_{11}\text{F}_3\text{N}_3\text{O}_4\text{S}_2$   $[\text{M}+\text{H}^+]$ , 394.0139; found, 394.0143,  $m/z$  calc for  $\text{C}_{13}\text{H}_{10}\text{F}_3\text{N}_3\text{O}_4\text{S}_2\text{Na}$   $[\text{M}+\text{Na}^+]$  415.9958; found, 415.9958.

*4-[8-Nitro-4-oxo-6-(trifluoromethyl)-4H-1,3-benzothiazin-2-yl]-1 $\lambda^6$ ,4-thiomorpholin-1,1-dione*

**(16d)** 8-Nitro-2-(1-oxo-1 $\lambda^4$ ,4-thiomorpholin-4-yl)-6-(trifluoromethyl)-4H-1,3-benzothiazin-4-one (**16b**) (0.100 mg, 0.265 mmol, 1.0 eq.) is dissolved in 5 ml DCM and cooled to 0 °C. A solution of meta-chloroperbenzoic acid (m-CPBA) 65 % (0.165 mg, 0.624 mmol, 2.4 eq.) in 5 ml DCM is slowly added, the reaction mixture is slowly warmed to RT and left overnight at RT. Solvent is then removed under vacuum, the residue is dissolved in EtAc and washed twice with  $\text{NaHCO}_3$  solution. The organic phase is dried over  $\text{MgSO}_4$  and concentrated *in vacuo*.



Purification is carried out by recrystallisation from diisopropyl ether. The title compound appears as a white solid (55 mg 51 %, HPLC purity 99.8 %,  $t_R = 10.8$  min).  $^1\text{H-NMR}$  (400 MHz,  $\text{CDCl}_3$ )  $\delta$  9.12 (d, Ar-H,  $^4J = 2.0$  Hz, 1H), 8.83 (d, Ar-H,  $^4J = 2.0$  Hz, 1H), 4.52 (bs,  $\text{CH}_2\text{-N-CH}_2$ , 4H), 3.23 (m,  $\text{CH}_2\text{-S-CH}_2$ , 4H)  $^{13}\text{C-NMR}$  (125 MHz, Aceton  $D_6$ )  $\delta$  165.4, 163.1, 144.7, 134.2, 131.9 (q,  $^2J_{\text{C,F}} = 3.8$  Hz), 128.7 (q,  $^2J_{\text{C,F}} = 35.3$  Hz), 126.7, 126.1 (q,  $^3J_{\text{C,F}} = 3.8$  Hz), 122.7 (q,  $^1J_{\text{C,F}} = 271.8$  Hz), 51.1, 44.6. HRMS  $m/z$  calc for  $\text{C}_{13}\text{H}_{10}\text{F}_3\text{N}_3\text{O}_5\text{S}_2\text{Na}$  [ $\text{M}+\text{Na}^+$ ], 431.9908; found, 431.9906.

*3-Hydroxyazetidone-1-thiourea (17a)* Compound **17a** is prepared according general procedure B, using 3-hydroxyazetidone\*HCl (0.100 g, 0.92 mmol, 1 eq.) and thiocarbonyldiimidazole (0.189 g, 1.06 mmol, 1.15 eq.). The crude product is purified by column chromatography (chloroform/MeOH 95:5). The title compound is a white solid (45 mg 37 %)  $^1\text{H-NMR}$  (500 MHz,  $\text{CD}_3\text{OD}$ )  $\delta$  4.51 (m, CH, 1H), 4.27 (bs,  $\text{CH}_2$ , 2H), 3.85 (bs,  $\text{CH}_2$ , 2H) MS  $m/z$  (APCI) 133.1 [ $\text{M}+\text{H}^+$ ].

*2-(3-hydroxyazetidone-1-yl)-8-nitro-6-(trifluoromethyl)-4H-1,3-benzothiazin-4-one (17b)* 2-Chloro-3-nitro-5-(trifluoromethyl)benzoic acid chloride is prepared from 2-chloro-3-nitro-5-(trifluoromethyl)benzoic acid (0.045 g, 0.16 mmol, 1.1 eq.) by general procedure A. **17b** is prepared by general procedure C, using 3-hydroxyazetidone-1-thiourea (**17a**) (0.020 g, 0.15 mmol, 1 eq.). The crude product is purified by column chromatography (chloroform/MeOH 9:1). The title compound appears as a yellow solid (18 mg 35 %, HPLC purity 99.2 %,  $t_R = 14.9$  min).  $^1\text{H-NMR}$  (400 MHz,  $\text{CD}_3\text{OD}$ )  $\delta$  8.99 (s, Ar-H, 1H), 8.87 (s, Ar-H, 1H), 4.78 (bs, CH, 1H), 4.60 (bs,  $\text{CH}_2$ , 2H), 4.14 (m,  $\text{CH}_2$ , 2H)  $^{13}\text{C-NMR}$  (100 MHz,  $\text{CD}_3\text{OD}$ )  $\delta$  166.7, 162.9, 144.0, 134.6, 132.1, 128.7 (q,  $^2J_{\text{C,F}} = 35.3$  Hz), 126.2, 125.8, 122.7 (q,  $^1J_{\text{C,F}} = 271.8$  Hz), 61.7, 61.5, 60.0 HRMS  $m/z$  calc for  $\text{C}_{12}\text{H}_9\text{F}_3\text{N}_3\text{O}_4\text{S}$  [ $\text{M}+\text{H}^+$ ], 348.0262; found, 348.0260, calc for  $\text{C}_{12}\text{H}_8\text{F}_3\text{N}_3\text{O}_4\text{SNa}$  [ $\text{M}+\text{Na}^+$ ], 370.0081; found, 370.0079.

*Morpholine-4-thiourea (18a)*

*Synthesis by procedure B* Compound **18a** is prepared by general procedure B, using morpholine (0.450 g, 5.17 mmol, 1 eq.) and thiocarbonyldiimidazole (1.058 g, 5.94 mmol, 1.15 eq.). The crude product is purified by recrystallisation from isopropanol/diisopropyl ether (1:1). The title compound is isolated as a white solid (515 mg 68 %).

*Synthesis by procedure E* Synthesis according to general procedure E, starting from morpholine (4.35 ml, 50 mmol, 1 eq.). Work-up after neutralization: the mixture was kept at 8 °C for 48 h, the precipitate filtered off, washed with a small amount of chloroform and dried. The title compound is isolated as a white solid (1.09 g, 15 %).

*Synthesis by procedure F* Synthesis according to general procedure F, starting from morpholine (166 mg, 1.91 mmol, 1 eq.). Compound **18a** was isolated as a slightly brownish solid (115 mg, 41 %)

<sup>1</sup>H-NMR (400 MHz, CD<sub>3</sub>OD) δ 3.80 (m, CH<sub>2</sub>, 4H), 3.67 (m, CH<sub>2</sub>, 4H) MS *m/z* (ESI) 146.98 [M+H<sup>+</sup>].

*2-(Morpholin-4-yl)-8-nitro-6-(trifluoromethyl)-4H-1,3-benzothiazin-4-one (18b)* 2-Chloro-3-nitro-5-(trifluoromethyl)benzoic acid chloride is prepared from 2-chloro-3-nitro-5-(trifluoromethyl)benzoic acid (0.050 g, 0.18 mmol, 1.1 eq.) by general procedure A. Compound **18b** is prepared by general procedure C using morpholine-4-thiourea (**18a**) (0.034 g, 0.23 mmol, 1 eq.). The crude product is purified by column chromatography (chloroform/MeOH 9:1). The title compound appears as a yellow solid (49 mg 75 %, HPLC purity 100.0 %, *t<sub>R</sub>* = 12.4 min). <sup>1</sup>H-NMR (500 MHz, CDCl<sub>3</sub>) δ 9.08 (d, 1H, Ar-H, <sup>4</sup>*J* = 1.5 Hz), 8.75 (d, 1H, Ar-H, <sup>4</sup>*J* = 1.5 Hz), 4.01 (m, 4H, CH<sub>2</sub>-N-CH<sub>2</sub>), 3.82 (m, 4H, CH<sub>2</sub>-O-CH<sub>2</sub>) <sup>13</sup>C-NMR (125 MHz, CDCl<sub>3</sub>) δ 166.3, 162.6, 143.9, 133.7, 133.5 (q, <sup>3</sup>*J*<sub>C,F</sub> = 3.7 Hz), 129.9 (q, <sup>2</sup>*J*<sub>C,F</sub> = 35.9 Hz), 126.8, 126.1 (q, <sup>3</sup>*J*<sub>C,F</sub> = 3.7 Hz), 122.3 (q, <sup>1</sup>*J*<sub>C,F</sub> = 272.5 Hz), 66.3, 46.7 HRMS *m/z* calc for C<sub>13</sub>H<sub>10</sub>F<sub>3</sub>N<sub>3</sub>O<sub>4</sub>SNa [M+Na<sup>+</sup>], 384.0237; found, 384.0239.

*4-[4-(Trifluoromethoxy)phenoxy]piperidine-1-thiourea (19a)* Compound **19a** is prepared by general procedure B, using 4-[4-(trifluoromethoxy)phenoxy]piperidine (0.100 g, 0.38 mmol, 1 eq.) and thiocarbonyldiimidazole (0.078 g, 0.44 mmol, 1.15 eq.). The crude product is purified by column chromatography (chloroform/MeOH 9:1). The title compound is a white solid (68 mg 56 %). <sup>1</sup>H-NMR (400 MHz, CD<sub>3</sub>OD) δ 7.18 (m, Ar-H, 2H), 7.03 (m, Ar-H, 2H), 4.65 (m, C-H, 1H), 4.05 (m, cyclohexyl, 2H), 3.82 (m, cyclohexyl, 2H), 2.01 (m, cyclohexyl, 2H), 1.78 (m, cyclohexyl, 2H) MS *m/z* (ESI) 319.15 [M-H<sup>+</sup>].

*8-Nitro-2-{4-[4-(trifluoromethoxy)phenoxy]piperidin-1-yl}-6-(trifluoromethyl)-4H-1,3-benzothiazin-4-one (19b)* 2-Chloro-3-nitro-5-(trifluoromethyl)benzoic acid chloride is prepared from 2-chloro-3-nitro-5-(trifluoromethyl)benzoic acid (0.049 g, 0.18 mmol, 1.1 eq.) by general procedure A. **19b** is prepared by general procedure C, using 4-[4-(trifluoromethoxy)phenoxy]piperidine-1-thiourea (**19a**) (0.050 g, 0.16 mmol, 1 eq.). The crude product is purified by column chromatography (chloroform/MeOH 95:5). The title compound is a beige coloured solid (52 mg 60 %, HPLC purity 100.0 %, *t<sub>R</sub>* = 13.9 min). <sup>1</sup>H-NMR (400 MHz, CDCl<sub>3</sub>) δ 9.10 (d, Ar-H, <sup>4</sup>*J* = 1.6 Hz, 1H), 8.75 (d, Ar-H, <sup>4</sup>*J* = 1.6 Hz, 1H), 7.17 (m, Ar-H, 2H), 6.93 (m, Ar-H, 2H) 4.68 (m, C-H, 1H), 4.51 (bs, cyclohexyl, 1H), 3.98 (m, cyclohexyl, 3H), 2.06 (s, cyclohexyl, 4H) <sup>13</sup>C-NMR (100 MHz, CDCl<sub>3</sub>) δ 166.5, 161.9, 155.2, 143.9, 143.3, 134.0, 133.4, 129.7 (q, <sup>2</sup>*J<sub>C,F</sub>* = 36.4 Hz), 126.7, 126.0, 122.4 (q, <sup>1</sup>*J<sub>C,F</sub>* = 272.8 Hz), 120.5 (q, <sup>1</sup>*J<sub>C,F</sub>* = 255.6 Hz), 116.8, 70.8, 42.9, 30.3 HRMS *m/z* calc for C<sub>21</sub>H<sub>16</sub>F<sub>6</sub>N<sub>3</sub>O<sub>5</sub>S [M+H<sup>+</sup>], 536.0711; found, 536.0707, calc for C<sub>21</sub>H<sub>15</sub>F<sub>6</sub>N<sub>3</sub>O<sub>5</sub>SNa [M+Na<sup>+</sup>], 558.0527; found, 558.0534.

*6-Methoxy-1,2,3,4-tetrahydroisoquinoline-2-thiourea (20a)* Compound **20a** is prepared by general procedure B, using 6-methoxy-1,2,3,4-tetrahydroisoquinoline (0.358 g, 2.20 mmol, 1 eq.) and thiocarbonyldiimidazole (0.450 g, 2.52 mmol, 1.15 eq.). The crude product is purified by column chromatography (LM chloroform/MeOH 95:5) and title compound appears as a

white solid (339 mg 62 %). <sup>1</sup>H-NMR (400 MHz, CD<sub>3</sub>OD) δ 7.08 (m, Ar-H, 1H), 6.79 (m, Ar-H, 2H), 4.83 (m, CH<sub>2</sub>, 2H, close to solvent signal), 3.95 (m, CH<sub>2</sub>, 2H), 3.79 (s, CH<sub>3</sub>, 3H), 2.91 (t, CH<sub>2</sub>, <sup>2</sup>J = 5.9 Hz, 2H) MS *m/z* (ESI) 223.06 [M+H<sup>+</sup>].

*2-(6-Methoxy-1,2,3,4-tetrahydroisoquinolin-2-yl)-8-nitro-6-(trifluoromethyl)-4H-1,3-benzothiazin-4-one* (**20b**) 2-Chloro-3-nitro-5-(trifluoromethyl)benzoic acid chloride is prepared from 2-chloro-3-nitro-5-(trifluoromethyl)benzoic acid (0.399 g, 1.49 mmol, 1.1 eq.) by general procedure A. Compound **20b** is prepared by general method 3, using 6-methoxy-1,2,3,4-tetrahydroisoquinoline-2-thiourea (**20a**) (0.300 g, 1.35 mmol, 1 eq.). The crude product is purified by column chromatography (chloroform/MeOH 99:1). The title compound is a yellow solid (545 mg 92 %, HPLC purity 95.2 %, *t<sub>R</sub>* = 15.0 min). <sup>1</sup>H-NMR (400 MHz, CDCl<sub>3</sub>) δ 9.13 (d, Ar-H, <sup>4</sup>J = 1.6 Hz, 1H), 8.76 (d, Ar-H, <sup>4</sup>J = 1.6 Hz, 1H), 7.14 (d, Ar-H, <sup>3</sup>J = 8.4 Hz, 1H), 6.81 (m, Ar-H, 1H), 6.75 (s, Ar-H, 1H), 5.01 (m, CH<sub>2</sub>, 2H), 4.15 (m, CH<sub>2</sub>, 2H), 3.80 (s, CH<sub>3</sub>, 3H), 3.02 (m, CH<sub>2</sub>, 2H) <sup>13</sup>C-NMR (100 MHz, CDCl<sub>3</sub>) δ 166.1, 162.3, 159.0, 143.9, 134.2, 133.5, 129.7 (q, <sup>2</sup>J<sub>C,F</sub> = 36.2 Hz), 127.7, 126.9, 126.0, 122.4 (q, <sup>1</sup>J<sub>C,F</sub> = 272.8 Hz), 113.0, 55.4, 47.8, 44.5, 29.0 HRMS *m/z* calc for C<sub>19</sub>H<sub>15</sub>F<sub>3</sub>N<sub>3</sub>O<sub>4</sub>S [M+H<sup>+</sup>], 438.0731; found, 438.0735, calc for C<sub>19</sub>H<sub>14</sub>F<sub>3</sub>N<sub>3</sub>O<sub>4</sub>SNa [M+Na<sup>+</sup>], 460.0551; found, 460.0553.

*7-Methoxy-1,2,3,4-tetrahydroisoquinoline-2-thiourea* (**21a**) Compound **21a** is prepared by general procedure B, using 7-methoxy-1,2,3,4-tetrahydroisoquinoline (0.073 g, 0.45 mmol, 1 eq.) and thiocarbonyldiimidazole (0.092 g, 0.51 mmol, 1.15 eq.). The crude product is purified by column chromatography (LM chloroform/MeOH/ammonia 36 % 98:2:1). The title compound appears as a white solid (76 mg 76 %). <sup>1</sup>H-NMR (400 MHz, CDCl<sub>3</sub>) δ 7.08 (d, Ar-H, <sup>3</sup>J = 8.4 Hz, 1H), 6.77 (dd, Ar-H, <sup>3</sup>J = 8.2 Hz, <sup>4</sup>J = 2.5 Hz, 1H), 6.71 (d, Ar-H, <sup>4</sup>J = 2.5 Hz, 1H), 5.95 (bs, NH<sub>2</sub>, 2H), 4.89 (bs, CH<sub>2</sub>, 2H), 3.90 (bs, CH<sub>2</sub>, 2H), 3.77 (s, CH<sub>3</sub>, 3H), 2.88 (t, CH<sub>2</sub>, <sup>3</sup>J = 5.9 Hz, 2H) MS *m/z* (ESI) 221.25 [M-H<sup>+</sup>].

*2-(7-Methoxy-1,2,3,4-tetrahydroisoquinolin-2-yl)-8-nitro-6-(trifluoromethyl)-4H-1,3-benzothiazin-4-one* (**21b**) 2-Chloro-3-nitro-5-(trifluoromethyl)benzoic acid chloride is prepared from 2-chloro-3-nitro-5-(trifluoromethyl)benzoic acid (0.026 g, 0.10 mmol, 1.1 eq.) by general procedure A. Compound **21b** is prepared by general procedure C, using 7-methoxy-1,2,3,4-tetrahydroisoquinoline-2-thiourea (**21a**) (0.020 g, 0.09 mmol, 1 eq.). The crude product is worked up by column chromatography (chloroform/MeOH 98:2) and recrystallised from EtAc/hexane (1:1). The title compound appears as a yellow solid (14 mg 36 %, HPLC purity 100.0 %,  $t_R = 15.1$  min).  $^1\text{H-NMR}$  (400 MHz,  $\text{CDCl}_3$ )  $\delta$  9.14 (s, Ar-H, 1H), 8.77 (s, Ar-H, 1H), 7.13 (d, Ar-H,  $^3J = 8.4$  Hz, 1H), 6.82 (d, Ar-H,  $^3J = 8.4$  Hz, 1H), 6.77 (s, Ar-H, 1H), 5.05 (m,  $\text{CH}_2$ , 2H), 4.16 (m,  $\text{CH}_2$ , 2H), 3.81 (s,  $\text{CH}_3$ , 3H), 3.00 (m,  $\text{CH}_2$ , 2H)  $^{13}\text{C-NMR}$  (100 MHz,  $\text{CDCl}_3$ )  $\delta$  166.1, 162.4, 158.7, 143.9, 134.1, 133.6 (q,  $^3J_{\text{C,F}} = 3.8$  Hz), 129.8 (q,  $^2J_{\text{C,F}} = 35.1$  Hz), 129.0, 126.9, 126.3, 126.0 (q,  $^3J_{\text{C,F}} = 3.8$  Hz), 121.4 (q,  $^1J_{\text{C,F}} = 273.9$  Hz), 113.8, 111.3, 55.4, 48.4, 45.0, 28.0 0 HRMS  $m/z$  calc for  $\text{C}_{19}\text{H}_{15}\text{F}_3\text{N}_3\text{O}_4\text{S}$  [ $\text{M}+\text{H}^+$ ], 438.0731; found, 438.0731.

*6,7-Dimethoxy-1,2,3,4-tetrahydroisoquinoline-2-thiourea* (**22a**) Compound **22a** is prepared by general procedure B, using 6,7-dimethoxy-1,2,3,4-tetrahydroisoquinoline (0.721 g, 3.73 mmol, 1.0 eq.) and thiocarbonyldiimidazole (0.765 g, 4.29 mmol, 1.15 eq.). The crude product is purified by column chromatography (chloroform/MeOH/ammonia 36 % 98:2:1). The title compound appears as a white solid (218 mg 23 %)  $^1\text{H-NMR}$  (400 MHz,  $\text{CD}_3\text{OD}$ )  $\delta$  6.78 (s, Ar-H, 1H), 6.74 (s, Ar-H, 1H), 4.84 (bs, N- $\text{CH}_2$ , 2H, Wasser Signal), 3.95 (m, N- $\text{CH}_2$ , 2H), 3.80 (s, O- $\text{CH}_3$ , 3H), 3.79 (s, O- $\text{CH}_3$ , 3H), 2.84 (t,  $\text{CH}_2$ ,  $^3J = 5.9$  Hz, 2H) MS  $m/z$  (APCI) 253.1 [ $\text{M}+\text{H}^+$ ].

*2-(6,7-Dimethoxy-1,2,3,4-tetrahydroisoquinolin-2-yl)-8-nitro-6-(trifluoromethyl)-4H-1,3-benzothiazin-4-one* (**22b**) 2-Chloro-3-nitro-5-(trifluoromethyl)benzoic acid chloride is prepared from 2-chloro-3-nitro-5-(trifluoromethyl)benzoic acid (0.229 g, 0.85 mmol, 1.1 eq.) by general procedure A. Compound **22b** is synthesised by general procedure C, using 6,7-

dimethoxy-1,2,3,4-tetrahydroisoquinoline-2-thiourea (**22a**) (0.194 g, 0.77 mmol, 1.0 eq.). The crude product is purified by column chromatographically (chloroform) and re-crystallised from EtOH. The title compound appears as a yellow solid (137 mg 38 %, HPLC purity 97.7 %,  $t_R = 14.5$  min).  $^1\text{H-NMR}$  (400 MHz,  $\text{CDCl}_3$ )  $\delta$  9.13 (d, Ar-H,  $^4J = 1.6$  Hz, 1H), 8.77 (d, Ar-H,  $^4J = 1.6$  Hz, 1H), 6.71 (s, Ar-H, 1H), 6.68 (s, Ar-H, 1H), 5.02 (m, N-CH<sub>2</sub>, 2H), 4.19 (m, N-CH<sub>2</sub>, 2H), 3.87 (s, O-CH<sub>3</sub>, 6H), 2.98 (m, CH<sub>2</sub>, 2H)  $^{13}\text{C-NMR}$  (125 MHz,  $\text{CDCl}_3$ )  $\delta$  166.2, 162.2, 148.3, 143.9, 134.2, 133.5 (q,  $^3J_{C,F} = 3.8$  Hz), 129.8 (q,  $^2J_{C,F} = 35.8$  Hz), 126.9, 126.0 (q,  $^3J_{C,F} = 3.8$  Hz), 125.3, 123.8, 122.4 (q,  $^1J_{C,F} = 273.1$  Hz), 111.2, 109.4, 56.2, 56.0, 48.0, 44.7, 28.1 HRMS  $m/z$  calc for  $\text{C}_{20}\text{H}_{17}\text{F}_3\text{N}_3\text{O}_5\text{S}$   $[\text{M}+\text{H}^+]$ , 468.0837; found, 468.0841, calc for  $\text{C}_{20}\text{H}_{16}\text{F}_3\text{N}_3\text{O}_5\text{SNa}$   $[\text{M}+\text{Na}^+]$ , 490.0657; found, 490.0661.

*1,2,3,4-Tetrahydroisoquinoline-2-thiourea* (**23a**) Compound **23a** is prepared by general procedure B, using 1,2,3,4-tetrahydroisoquinoline (0.750 g, 5.63 mmol, 1.0 eq.) and thiocarbonyldiimidazole (1.154 g, 6.48 mmol, 1.15 eq.). The crude product is recrystallised from diisopropyl ether/isopropanol 1:1. The title compound appears as a white solid (610 mg 56 %)  $^1\text{H-NMR}$  (400 MHz,  $\text{CD}_3\text{OD}$ )  $\delta$  7.18 (m, Ar-H, 4H), 4.89 (bs, N-CH<sub>2</sub>, 2H), 3.95 (bs, N-CH<sub>2</sub>, 2H), 2.91 (t, CH<sub>2</sub>,  $^3J = 5.9$  Hz, 2H) MS  $m/z$  (ESI) 191.21  $[\text{M}-\text{H}^+]$ .

*8-Nitro-2-(1,2,3,4-tetrahydroisoquinolin-2-yl)-6-(trifluoromethyl)-4H-1,3-benzothiazin-4-one* (**23b**) 2-Chloro-3-nitro-5-(trifluoromethyl)benzoic acid chloride is prepared from 2-chloro-3-nitro-5-(trifluoromethyl)benzoic acid (0.463 g, 1.72 mmol, 1.1 eq.) by general procedure a. **23b** is synthesised by general procedure C, using 1,2,3,4-tetrahydroisoquinoline-2-thiourea (**23a**) (0.300 g, 1.56 mmol, 1.0 eq.). The crude product is purified by column chromatography (chloroform). The final product appears as a yellow solid (438 mg 69 %, HPLC purity 99.1 %,  $t_R = 15.0$  min).  $^1\text{H-NMR}$  (400 MHz,  $\text{CDCl}_3$ )  $\delta$  9.13 (d, Ar-H,  $^4J = 2.0$  Hz, 1H), 8.77 (d, Ar-H,  $^4J = 2.0$  Hz, 1H), 7.25 (m, Ar-H, 4H), 5.08 (m, N-CH<sub>2</sub>, 2H), 4.17 (m, N-CH<sub>2</sub>, 2H), 3.07 (m, CH<sub>2</sub>, 2H)  $^{13}\text{C}$ -

NMR (125 MHz, CDCl<sub>3</sub>) δ 166.1, 162.3, 143.9, 134.6, 134.1, 133.7, 133.5 (q, <sup>3</sup>J<sub>C,F</sub> = 3.8 Hz), 131.8, 129.7 (q, <sup>2</sup>J<sub>C,F</sub> = 35.8 Hz), 128.7, 128.0, 127.7, 127.2, 126.6, 126.8, 126.0 (q, <sup>3</sup>J<sub>C,F</sub> = 3.8 Hz), 122.4 (q, <sup>1</sup>J<sub>C,F</sub> = 273.1 Hz), 48.2, 44.6, 28.7 HRMS *m/z* calc for C<sub>18</sub>H<sub>12</sub>F<sub>3</sub>N<sub>3</sub>O<sub>3</sub>Na [M+Na<sup>+</sup>], 430.0445; found, 430.0438.

*4-(Piperidin-1-yl)piperidine-1-thiourea (24a)* Compound **24a** is prepared by general procedure B, using 4-(piperidin-1-yl)piperidine (0.100 g, 0.59 mmol, 1 eq.) and thiocarbonyldiimidazole (0.121 g, 0.68 mmol, 1.15 eq.). The crude product is purified by column chromatography (chloroform/MeOH/ammonia 36 % 90:10:1). The title compound appears as a white solid (24 mg 18 %) <sup>1</sup>H-NMR (400 MHz, CDCl<sub>3</sub>) δ 5.76 (s, NH<sub>2</sub>, 2H), 4.53 (s, CH, 1H), 3.06 (m, cyclohexyl, 2H), 2.51 (m, cyclohexyl, 5H), 1.88 (m, cyclohexyl, 2H), 1.60 (m, cyclohexyl, 7H), 1.43 (m, cyclohexyl, 2H) MS *m/z* (ESI) 228.13 [M+H<sup>+</sup>].

*8-Nitro-2-[4-(piperidin-1-yl)piperidin-1-yl]-6-(trifluoromethyl)-4H-1,3-benzothiazin-4-one (24b)* 2-Chloro-3-nitro-5-(trifluoromethyl)benzoic acid chloride is prepared from 2-chloro-3-nitro-5-(trifluoromethyl)benzoic acid (0.024 g, 0.09 mmol, 1.1 eq.) by general procedure A. **24b** is prepared by general procedure C, using 4-(piperidin-1-yl)piperidin-1-thiourea (**24a**) (0.018 g, 0.08 mmol, 1 eq.). The crude product is worked up by column chromatography (chloroform/MeOH/ammonia 36 % 98:2:1). The title compound appears as a yellow solid (20 mg 57 %, HPLC purity 99.4 %, *t<sub>R</sub>* = 12.4 min) <sup>1</sup>H-NMR (400 MHz, CDCl<sub>3</sub>) δ 9.10 (d, Ar-H, <sup>4</sup>J = 1.6 Hz, 1H), 8.74 (d, Ar-H, <sup>4</sup>J = 1.6 Hz, 1H), 5.22 (bs, cyclohexyl, 1H), 4.42 (bs, cyclohexyl, 1H), 3.18 (m, cyclohexyl, 2H), 2.65 (m, CH, 1H), 2.52 (m, cyclohexyl, 4H), 2.03 (m, cyclohexyl, 2H), 1.63 (m, cyclohexyl, 6H), 1.45 (m, cyclohexyl, 2H) <sup>13</sup>C-NMR (100 MHz, CDCl<sub>3</sub>) δ 166.5, 161.6, 143.9, 134.2, 133.3, 129.6 (q, <sup>2</sup>J<sub>C,F</sub> = 35.1 Hz), 126.7, 125.9, 126.0, 122.4 (q, <sup>1</sup>J<sub>C,F</sub> = 273.1 Hz), 61.8, 50.3, 46.1 28.1 26.2, 24.5 HRMS *m/z* calc for C<sub>19</sub>H<sub>22</sub>F<sub>3</sub>N<sub>4</sub>O<sub>3</sub>S [M+H<sup>+</sup>], 443.1361; found, 443.1357, calc for C<sub>19</sub>H<sub>21</sub>F<sub>3</sub>N<sub>4</sub>O<sub>3</sub>Na [M+Na<sup>+</sup>], 465.1180; found, 465.1176.

*5-Benzyl-octahydropyrrolo[3,4-c]pyrrole-2-thiourea (25a)* Compound **25a** is prepared by general procedure B, using 2-benzyl-octahydropyrrolo[3,4-c]pyrrole (0.100 g, 0.49 mmol, 1 eq.) and thiocarbonyldiimidazole (0.101 g, 0.57 mmol, 1.15 eq.). The crude product is purified by column chromatography (chloroform/MeOH 98:2) and the title compound is a white solid (58 mg 45 %) <sup>1</sup>H-NMR (400 MHz, CDCl<sub>3</sub>) δ 7.28 (m, Ar-H, 5H), 5.67 (bs, NH<sub>2</sub>, 2H), 3.87 (bs, Octahydropyrrolo[3,4-c]pyrrole, 2H), 3.59 (s, CH<sub>2</sub>, 2H), 3.42 (bs, octahydropyrrolo[3,4-c]pyrrole, 2H), 2.94 (bs, octahydropyrrolo[3,4-c]pyrrole, 2H), 2.60 (m, octahydropyrrolo[3,4-c]pyrrole, 2H), 2.53 (m, octahydropyrrolo[3,4-c]pyrrole, 2H) MS *m/z* (ESI) 262.12 [M+H<sup>+</sup>].

*2-{5-Benzyl-octahydropyrrolo[3,4-c]pyrrol-2-yl}-8-nitro-6-(trifluoromethyl)-4H-1,3-benzothiazin-4-one (25b)* 2-Chloro-3-nitro-5-(trifluoromethyl)benzoic acid chloride is prepared from 2-chloro-3-nitro-5-(trifluoromethyl)benzoic acid (0.045 g, 0.17 mmol, 1.1 eq.) by general procedure A. **25b** is prepared by general procedure C, using 5-benzyl-octahydropyrrolo[3,4-c]pyrrole-2-thiourea (**25a**) (0.040 g, 0.15 mmol, 1 eq.). The crude product is purified by column chromatography (chloroform/MeOH 98:2). The title compound appears as a light yellow solid (50 mg 69 %, HPLC purity 94.9 %, *t<sub>R</sub>* = 12.9 min) <sup>1</sup>H-NMR (400 MHz, CDCl<sub>3</sub>) δ 9.15 (s, Ar-H, 1H), 8.76 (s, Ar-H, 1H), 7.28 (m, Ar-H, 5H), 4.18 (m, Octahydropyrrolo[3,4-c]pyrrole, 1H), 3.94 (m, Octahydropyrrolo[3,4-c]pyrrole, 2H), 3.62 (bs, CH<sub>2</sub>, 2H), 3.60 (m, Octahydropyrrolo[3,4-c]pyrrole, 1H), 3.11 (bs, Octahydropyrrolo[3,4-c]pyrrole, 1H), 2.99 (bs, Octahydropyrrolo[3,4-c]pyrrole, 1H), 2.70 (m, Octahydropyrrolo[3,4-c]pyrrole, 2H), 2.58 (m, Octahydropyrrolo[3,4-c]pyrrole, 2H) <sup>13</sup>C-NMR (100 MHz, CDCl<sub>3</sub>) δ 165.9, 159.8, 143.6, 138.4, 134.6, 133.7 (q, <sup>3</sup>*J*<sub>C,F</sub> = 3.8 Hz), 129.6 (q, <sup>2</sup>*J*<sub>C,F</sub> = 35.8 Hz), 128.5, 128.4, 127.2, 126.8, 125.8 (q, <sup>3</sup>*J*<sub>C,F</sub> = 3.8 Hz), 122.4 (q, <sup>1</sup>*J*<sub>C,F</sub> = 273.1 Hz), 59.7, 59.6, 59.1, 56.3, 53.3, 41.8, 40.0 HRMS *m/z* calc for C<sub>22</sub>H<sub>20</sub>F<sub>3</sub>N<sub>4</sub>O<sub>3</sub>S [M+H<sup>+</sup>], 477.1204; found, 477.1206.



*tert-Butyl 6-thiourea-octahydro-1H-pyrrolo[3,4-b]pyridine-1-carboxylate (26a)* Compound **26a** is prepared by general procedure B, using *tert*-butyloctahydro-1H-pyrrolo[3,4-b]pyridine-1-carboxylate (0.500 g, 2.21 mmol, 1.0 eq.) and thiocarbonyldiimidazole (0.453 g, 2.54 mmol, 1.15 eq.). For better solubility of *tert*-butyloctahydro-1H-pyrrolo[3,4-b]pyridine-1-carboxylate 3 ml MeOH are added to the reaction mixture. The crude product is purified by column chromatography (EtAc). The title compound appears as a white solid (397 mg 63 %). <sup>1</sup>H-NMR (400 MHz, CD<sub>3</sub>OD) δ 4.69 (bs, 2,8-diazabicyclo[4.3.0]nonane, 1H), 3.90 (m, 2,8-diazabicyclo[4.3.0]nonane, 2H), 3.56 (m, 2,8-diazabicyclo[4.3.0]nonane, 2H), 3.35 (m, 2,8-diazabicyclo[4.3.0]nonane, 1H), 2.81 (bs, 2,8-diazabicyclo[4.3.0]nonane, 1H), 2.26 (m, 2,8-diazabicyclo[4.3.0]nonane, 1H), 1.75 (m, 2,8-diazabicyclo[4.3.0]nonane, 2H), 1.47 (s, *t*-Boc, 9H), 1.36 (m, 2,8-diazabicyclo[4.3.0]nonane, 2H) MS *m/z* (ESI) 285.99 [M+H<sup>+</sup>], 303.03 [M+Na<sup>+</sup>].

*tert-Butyl 6-[8-nitro-4-oxo-6-(trifluoromethyl)-4H-1,3-benzothiazin-2-yl]-octahydro-1H-pyrrolo[3,4-b]pyridine-1-carboxylate (26b)* 2-Chloro-3-nitro-5-(trifluoromethyl)benzoic acid chloride is prepared from 2-chloro-3-nitro-5-(trifluoromethyl)benzoic acid (0.215 g, 0.80 mmol, 1.1 eq.) by general procedure A. **26b** is synthesised by general procedure C, using *tert*-butyl-6-thiourea octahydro-1H-pyrrolo[3,4-b]pyridine-1-carboxylate (**26a**) (0.205 g, 0.72 mmol, 1.0 eq.). The crude product is purified by column chromatography (EtAc/heptane 1:1). The title compound appears as a yellow solid (180 mg 50 %, HPLC purity 98.6 %, *t<sub>R</sub>* = 15.0 min). <sup>1</sup>H-NMR (400 MHz, CDCl<sub>3</sub>) δ 9.06 (m, Ar-H, 1H), 8.69 (d, Ar-H, <sup>4</sup>*J* = 1.7 Hz, 1H), 4.83 (m, 2,8-diazabicyclo[4.3.0]nonane, 1H), 4.02 (m, 2,8-diazabicyclo[4.3.0]nonane, 2H), 3.77 (m, 2,8-diazabicyclo[4.3.0]nonane, 0.5H), 3.72 (m, 2,8-diazabicyclo[4.3.0]nonane, 1H), 3.58 (m, 2,8-diazabicyclo[4.3.0]nonane, 1H), 3.48 (m, 2,8-diazabicyclo[4.3.0]nonane, 0.5H), 2.71 (m, 2,8-diazabicyclo[4.3.0]nonane, 1H), 2.34 (m, 2,8-diazabicyclo[4.3.0]nonane, 1H), 1.83 (m, 2,8-diazabicyclo[4.3.0]nonane, 1H), 1.70 (m, 2,8-diazabicyclo[4.3.0]nonane, 1H), 1.44 (s, *t*-Boc,

5H), 1.42 (m, 2,8-diazabicyclo[4.3.0]nonane, 2H), 1.41 (s, t-Boc, 4H) <sup>13</sup>C-APT-NMR (100 MHz, CDCl<sub>3</sub>) δ 165.9, 161.6, 154.8, 143.6, 134.2, 133.8 (q, <sup>3</sup>J<sub>C,F</sub> = 3.1 Hz), 129.7, 126.8, 125.9 (q, <sup>3</sup>J<sub>C,F</sub> = 3.1 Hz), 122.4 (q, <sup>1</sup>J<sub>C,F</sub> = 273.1 Hz), 80.7, 54.7, 52.3, 50.9, 47.0, 44.1, 38.7, 35.3, 33.9, 28.3, 25.3, 23.8 HRMS *m/z* calc for C<sub>21</sub>H<sub>24</sub>F<sub>3</sub>N<sub>4</sub>O<sub>5</sub> [M+H<sup>+</sup>], 501.1415; found, 501.1411.

*8-Nitro-2-{octahydro-1H-pyrrolo[3,4-b]pyridin-6-yl}-6-(trifluoromethyl)-4H-1,3-benzothiazin-4-one* (**26c**) tert-butyl 6-[8-nitro-4-oxo-6-(trifluoromethyl)-4H-1,3-benzothiazin-2-yl]-octahydro-1H-pyrrolo[3,4-b]pyridine-1-carboxylate (**26b**) (0.273 g, 0.55 mmol, 1.0 eq.) is dissolved in a mixture of 2 ml DCM and 2 ml TFA and stirred at room temperature for 1.5 h. The solvent is removed under vacuum and the reaction mixture is co-evaporated three times each with toluene and chloroform. The crude product purified by column chromatography (chloroform/MeOH/ammonia 36 % 95:5:1). The title compound appears as a yellow amorphous substance (164 mg 75 %, HPLC purity 96.0 %, *t<sub>R</sub>* = 13.5 min). <sup>1</sup>H-NMR (400 MHz, CDCl<sub>3</sub>) δ 9.05 (m, Ar-H, 1H), 8.66 (m, Ar-H, 1H), 3.71 (m, 2,8-diazabicyclo[4.3.0]nonane, 4H), 3.40 (m, NH, 1H), 2.94 (m, 2,8-diazabicyclo[4.3.0]nonane, 1H), 2.62 (m, 2,8-diazabicyclo[4.3.0]nonane, 1H), 2.52 (m, 2,8-diazabicyclo[4.3.0]nonane, 1H), 2.39 (m, 2,8-diazabicyclo[4.3.0]nonane, 1H), 1.68 (m, 2,8-diazabicyclo[4.3.0]nonane, 4H) <sup>13</sup>C-NMR (100 MHz, CDCl<sub>3</sub>) δ 165.7, 161.0, 143.4, 134.1, 133.5, 129.4, 126.8, 125.7, 122.4 (q, <sup>1</sup>J<sub>C,F</sub> = 273.1 Hz), 57.9, 56.1, 54.9, 54.6, 51.4, 48.1, 45.2, 44.9, 37.3, 35.5, 22.8, 22.7, 21.1, 20.8 HRMS *m/z* calc for C<sub>16</sub>H<sub>16</sub>F<sub>3</sub>N<sub>4</sub>O<sub>3</sub>S [M+H<sup>+</sup>], 401.0891; found, 401.0879.

*2-{1-Benzyl-octahydro-1H-pyrrolo[3,4-b]pyridin-6-yl}-8-nitro-6-(trifluoromethyl)-4H-1,3-benzothiazin-4-one* (**26d**) 8-Nitro-2-{octahydro-1H-pyrrolo[3,4-b]pyridin-6-yl}-6-(trifluoromethyl)-4H-1,3-benzothiazin-4-one (**26c**) (0.020 g, 0.05 mmol, 1.0 eq.) is dissolved in a mixture of equal parts DCM and saturated aqueous Na<sub>2</sub>CO<sub>3</sub> solution. To this solution is added benzyl bromide (0.011 g, 0.06 mmol, 1.24 eq.) and the reaction mixture is left at room

temperature for 12 h. The aqueous phase is then extracted three times with DCM. The organic phases are collected, dried with MgSO<sub>4</sub> and the solvent is removed *in vacuo*. Further purification is carried out by column chromatography (chloroform/ammonia 36 % 99:1). The title compound as a yellow solid (18 mg 72 %, HPLC purity 99.5%, *t*<sub>R</sub> = 12.4 min). <sup>1</sup>H-NMR (400 MHz, CDCl<sub>3</sub>) δ 9.17 (m, Ar-H, 1H), 8.76 (m, Ar-H, 1H), 7.25 (m, Ar-H, 5H), 3.82 (m, 2,8-diazabicyclo[4.3.0]nonane, N-CH<sub>2</sub>-Ar, 4H), 3.51 (m, N-CH<sub>2</sub>-Ar, 1H), 3.34 (m, 2,8-diazabicyclo[4.3.0]nonane, 1H), 2.72 (bs, 2,8-diazabicyclo[4.3.0]nonane, 1H), 2.52 (m, 2,8-diazabicyclo[4.3.0]nonane, 1H), 2.31 (m, 2,8-diazabicyclo[4.3.0]nonane, 1H), 1.66 (m, 2,8-diazabicyclo[4.3.0]nonane, 5H) <sup>13</sup>C-APT-NMR (100 MHz, CDCl<sub>3</sub>) δ 165.9, 161.0, 143.6, 138.6, 134.5, 133.7, 129.5 (q, <sup>2</sup>J<sub>C,F</sub> = 35.9 Hz), 128.8, 128.4, 128.3, 128.2, 127.1, 126.9, 125.8, 122.4 (q, <sup>1</sup>J<sub>C,F</sub> = 273.1 Hz), 61.9, 60.2, 59.6, 59.5, 52.6, 51.6, 50.4, 50.0, 49.7, 48.4, 37.7, 36.1, 23.6, 22.1 HRMS *m/z* calc for C<sub>23</sub>H<sub>22</sub>F<sub>3</sub>N<sub>4</sub>O<sub>3</sub>S [M+H<sup>+</sup>], 491.1361; found, 491.1346.

**6-Benzyl-octahydro-1H-pyrrolo[3,4-b]pyridine-1-thiourea (27a)** Compound **27a** is prepared by general procedure B, using 6-benzyl-octahydro-1H-pyrrolo[3,4-b]pyridine (0.140 g, 0.64 mmol, 1.0 eq.) and thiocarbonyldiimidazole (0.131 g, 0.73 mmol, 1.15 eq.). The crude product is processed by column chromatography (chloroform/MeOH/ammonia 36 % 90:10:1). The title compound appears as a white solid (95 mg 54 %). <sup>1</sup>H-NMR (400 MHz, CDCl<sub>3</sub>) δ 7.26 (m, Ar-H, 5H), 5.97 (bs, NH<sub>2</sub>, 2H), 5.15 (bs, 2,8-diazabicyclo[4.3.0]nonane, 1H), 4.19 (bs, 2,8-diazabicyclo[4.3.0]nonane, 1H), 3.68 (d, N-CH<sub>2</sub>-Ar, <sup>2</sup>J = 13.1 Hz, 1H), 3.60 (d, N-CH<sub>2</sub>-Ar, <sup>2</sup>J = 13.1 Hz, 1H), 3.12 (m, 2,8-diazabicyclo[4.3.0]nonane, 1H), 2.98 (m, 2,8-diazabicyclo[4.3.0]nonane, 1H), 2.78 (m, 2,8-diazabicyclo[4.3.0]nonane, 1H), 2.58 (t, 2,8-diazabicyclo[4.3.0]nonane, <sup>3</sup>J = 6.8 Hz, 1H), 2.52 (dd, 2,8-diazabicyclo[4.3.0]nonane, <sup>3</sup>J = 9.2 Hz, <sup>4</sup>J = 2.0 Hz, 1H), 2.36 (m, 2,8-diazabicyclo[4.3.0]nonane, 1H), 1.86 (m, 2,8-diazabicyclo[4.3.0]nonane, 1H), 1.70 (m, 2,8-

diazabicyclo[4.3.0]nonane, 1H), 1.57 (m, 2,8-diazabicyclo[4.3.0]nonane, 2H) MS  $m/z$  (ESI) 276.10 [M+H<sup>+</sup>].

*2-{6-Benzyl-octahydro-1H-pyrrolo[3,4-b]pyridin-1-yl}-8-nitro-6-(trifluoromethyl)-4H-1,3-benzothiazin-4-one* (**27b**) 2-Chloro-3-nitro-5-(trifluoromethyl)benzoic acid chloride is prepared from 2-chloro-3-nitro-5-(trifluoromethyl)benzoic acid (0.102 g, 0.38 mmol, 1.1 eq.) by general method 1. **27b** is synthesised by general procedure C, using tert-6-benzyl-octahydro-1H-pyrrolo[3,4-b]pyridine-1-thiourea (**27a**) (0.095 g, 0.34 mmol, 1.0 eq.). The crude product is purified by column chromatography (chloroform/ammonia 36 % 99:1). The title compound is a yellow solid (54 mg 32 %, HPLC purity 99.0 %,  $t_R$  = 14.1 min). <sup>1</sup>H-NMR (400 MHz, CDCl<sub>3</sub>)  $\delta$  9.07 (d, Ar-H, <sup>4</sup> $J$  = 1.6 Hz, 1H), 8.72 (m, Ar-H, <sup>4</sup> $J$  = 1.6 Hz, 1H), 7.28 (m, Ar-H, 5H), 5.66 (bs, 2,8-diazabicyclo[4.3.0]nonane, 0.5H), 5.02 (bs, 2,8-diazabicyclo[4.3.0]nonane, 0.5H), 4.80 (bs, 2,8-diazabicyclo[4.3.0]nonane, 0.5H), 4.12 (bs, 2,8-diazabicyclo[4.3.0]nonane, 0.5H), 3.74 (bs, CH<sub>2</sub>-Ar, 1H) 3.65 (m, CH<sub>2</sub>-Ar, 1H), 3.41 (bs, 2,8-diazabicyclo[4.3.0]nonane, 0.5H), 3.09 (bs, 2,8-diazabicyclo[4.3.0]nonane, 0.5H), 3.02 (t, 2,8-diazabicyclo[4.3.0]nonane, <sup>4</sup> $J$  = 9.5 Hz, 1H), 2.69 (m, 2,8-diazabicyclo[4.3.0]nonane, 3H) 2.42 (m, 2,8-diazabicyclo[4.3.0]nonane, 1H), 1.94 (m, 2,8-diazabicyclo[4.3.0]nonane, 4H) <sup>13</sup>C-NMR (125 MHz, CDCl<sub>3</sub>)  $\delta$  166.2, 162.9, 143.9, 138.6, 134.3, 133.3 (q, <sup>3</sup> $J_{C,F}$  = 3.8 Hz), 129.6 (q, <sup>2</sup> $J_{C,F}$  = 35.3 Hz), 128.5, 128.3, 127.1, 126.8, 125.9 (q, <sup>3</sup> $J_{C,F}$  = 3.8 Hz), 122.4 (q, <sup>1</sup> $J_{C,F}$  = 272.8 Hz), 60.0, 58.7, 56.1, 55.0, 54.4, 43.4, 36.4, 35.9, 26.4, 25.7, 22.9, 22.1 HRMS  $m/z$  calc for C<sub>23</sub>H<sub>22</sub>F<sub>3</sub>N<sub>4</sub>O<sub>3</sub>S [M+H<sup>+</sup>], 491.1360; found, 491.1354.

*1-(Cyclohexylmethyl)piperazine* (**28a**) N-formylpiperazine (1.32 ml, 12.8 mmol, 1.0 eq.), cyclohexylmethyl bromide (1.97 ml, 14.1 mmol, 1.1 eq.), KI (0.026 g, 0.18 mmol, 0.014 eq.) and K<sub>2</sub>CO<sub>3</sub> (2.13 g, 15.4 mmol, 1.2 eq.) are dissolved in a round bottom flask in 10 ml acetonitrile. After 23 h heating under reflux the reaction mixture is filtered and the filtrate is concentrated on the rotary evaporator. After dissolving the residue in 5 N NaOH solution (5.0

ml) and EtOH (9.3 ml), it is heated for 14 h under reflux. After the reaction is complete, the EtOH is removed under vacuum, distilled water is added to the residue and extracted three times with DCM. The organic layers are collected, dried over MgSO<sub>4</sub> and the solvent removed under vacuum. The crude product is purified by column chromatography chloroform/MeOH/ammonia 36 %. (9:1:0.1). The title compound is a colourless oil (1.83 g 79 %). <sup>1</sup>H-NMR (400 MHz, CDCl<sub>3</sub>) δ 3.76 (bs, N-H, 1H), 2.95 (t, CH<sub>2</sub>-N-CH<sub>2</sub>, <sup>3</sup>J=4.9 Hz, 4H), 2.43 (bs, CH<sub>2</sub>-N-CH<sub>2</sub>, 4H), 2.11 (d, N-CH<sub>2</sub>-CH, <sup>3</sup>J=7.2 Hz, 2H), 1.70 (m, Cyclohexyl, 5H), 1.46 (m, CH<sub>2</sub>-CH-(CH<sub>2</sub>)<sub>2</sub>, 1H), 1.18 (m, Cyclohexyl, 3H), 0.86 (m, Cyclohexyl, 2H) MS *m/z* (ESI) 183.30 [M+H<sup>+</sup>].

*4-(Cyclohexylmethyl)piperazin-1-thiourea (28b)* Compound **28b** is prepared by general procedure B, using 3-cyclohexylmethylpiperazine (**28a**) (0.190 g, 1.04 mmol, 1 eq.) and thiocarbonyldiimidazole (0.214 g, 1.20 mmol, 1.15 eq.). The crude product is purified by column chromatography (LM chloroform/MeOH 98:2). The title compound appears as a brownish solid (118 mg 52 %). <sup>1</sup>H-NMR (400 MHz, CDCl<sub>3</sub>) δ 5.85 (m, NH<sub>2</sub>, 2H), 3.83 (m, CH<sub>2</sub>-N-CH<sub>2</sub>, 4H), 2.47 (m, CH<sub>2</sub>-N-CH<sub>2</sub>, 4H), 2.17 (d, N-CH<sub>2</sub>-CH, <sup>3</sup>J = 7.2 Hz, 2H), 1.71 (m, cyclohexyl, 5H), 1.47 (m, N-CH<sub>2</sub>-CH, 1H), 1.19 (m, cyclohexyl, 3H), 0.88 (m, cyclohexyl, 2H) MS *m/z* (ESI): 242.12 [M+H<sup>+</sup>].

*Macozinone* 2-Chloro-3-nitro-5-(trifluoromethyl)benzoic acid chloride is prepared from 2-chloro-3-nitro-5-(trifluoromethyl)benzoic acid (0.282 g, 1.04 mmol, 1.0 eq.) according to general procedure A. The synthesis of the benzothiazinone is carried out according to general procedure C. The precipitated product is isolated by filtration and recrystallised from acetone. The title compound is light yellow solid (293 mg 68 %, HPLC purity 100.0 %, *t<sub>R</sub>* = 12.5 min). <sup>1</sup>H-NMR (400 MHz, CDCl<sub>3</sub>) δ 9.09 (d, Ar-H, <sup>4</sup>J = 2.0, 1H), 8.75 (d, Ar-H, <sup>4</sup>J = 2.0, 1H), 3.98 (m, CH<sub>2</sub>-N-CH<sub>2</sub>, 4H), 2.56 (m, CH<sub>2</sub>-N-CH<sub>2</sub>, 4H), 2.20 (m, N-CH<sub>2</sub>-CH, 2H), 1.74 (m, cyclohexyl, 5H), 1.51 (m, N-CH<sub>2</sub>-CH, 1H), 1.22 (m, cyclohexyl, 3H), 0.89 (m, cyclohexyl, 2H) <sup>13</sup>C-NMR (100 MHz,

CDCl<sub>3</sub>)  $\delta$  166.4, 162.0, 143.9, 134.1, 133.4 (q,  $^3J_{C,F} = 3.4$  Hz), 129.7 (q,  $^2J_{C,F} = 35.5$  Hz), 126.8, 126.0 (q,  $^3J_{C,F} = 3.8$  Hz), 122.4 (q,  $^1J_{C,F} = 273.1$  Hz), 65.1, 53.1, 46.6, 35.0, 31.7, 26.7, 26.0 HRMS  $m/z$  calc for C<sub>23</sub>H<sub>22</sub>F<sub>3</sub>N<sub>4</sub>O<sub>3</sub>S [M+H<sup>+</sup>], 457.15217; found, 457.1512.

(2S)-2-Methyl-1,4-dioxo-8-azaspiro[4.5]decane (**29a**) 4-Piperidone monohydrate (995 mg, 6.57 mmol, 1 eq.) and (2S)-propane-1,2-diol (0.500 mg, 6.57 mmol, 1 eq.) are dissolved in anisole (50 ml). After addition of p-toluenesulfonic acid monohydrate (0.125 mg, 0.66 mmol, 0.1 eq.) the reaction mixture is boiled for 4 h on the water separator. Then the anisole is removed on the rotary evaporator and the crude product obtained is suspended in brine. After addition of NaOH solution (2 N, pH 12) the product is extracted from the aqueous phase with diethyl ether (six times). The ether phases are combined, dried over MgSO<sub>4</sub> and the solvent removed *in vacuo*. The product appears as a colourless oil (186 mg 15 %). <sup>1</sup>H-NMR (400 MHz, CDCl<sub>3</sub>)  $\delta$  4.22 (m, CH<sub>2</sub>-CH-CH<sub>3</sub>, 1H), 4.05 (dd, CH<sub>2</sub>-CH-CH<sub>3</sub>,  $^2J = 7.8$  Hz, 1H), 3.44 (t, CH<sub>2</sub>-CH-CH<sub>3</sub>,  $^2J = 7.8$  Hz, 1H), 2.92 (m, CH<sub>2</sub>-N-CH<sub>2</sub>, 4H), 1.87 (bs, N-H, 1H), 1.67 (m, CH<sub>2</sub>-C-CH<sub>2</sub>, 4H), 1.27 (d, CH<sub>3</sub>,  $^3J = 6.0$  Hz, 3H) MS  $m/z$  (APCI) 158.2 [M+H<sup>+</sup>].

(2S)-2-Methyl-1,4-dioxo-8-azaspiro[4.5]decane-8-thiourea (**29b**) Dried NaSCN (338 mg, 4.16 mmol, 1.0 eq.) is suspended in acetone (10 ml), placed under inert gas and cooled to 5 °C. Benzoyl chloride (0.480 ml, 4.16 mmol, 1.0 eq.) is added slowly and the reaction mixture is stirred for 3.5 h at 5 °C. This is followed by the addition of (2S)-2-methyl-1,4-dioxo-8-azaspiro[4.5]decane (**29a**) (186 mg, 4.16 mmol, 1.0 eq.) dissolved in acetone (5 ml) at 12 °C, then the reaction mixture is stirred at room temperature overnight. After the reaction, the solvent is removed under vacuum and the residue is dissolved in 19 ml MeOH/water mixture (3:1) and K<sub>2</sub>CO<sub>3</sub> (1152 mg, 8.34 mmol, 1.0 eq.) is added. The reaction mixture is heated under reflux for 24 h. After the reaction is complete, the solid is removed by filtration and the solvent is concentrated *in vacuo*. The crude product is suspended in brine and the aqueous phase is

extracted with EtAc (three times). The organic layers are collected, dried (MgSO<sub>4</sub>) and concentrated. The crude product is purified by column chromatography (TBME). The product is a white solid (111 mg 43 %). <sup>1</sup>H-NMR (400 MHz, CDCl<sub>3</sub>) δ 6.07 (bs, N-H, 2H), 4.23 (m, CH<sub>2</sub>-CH-CH<sub>3</sub>, 1H), 4.06 (dd, CH<sub>2</sub>-CH-CH<sub>3</sub>, <sup>2</sup>J = 8.0 Hz, 1H), 3.88 (m, CH<sub>2</sub>-N-CH<sub>2</sub>, 4H), 3.44 (t, CH<sub>2</sub>-CH-CH<sub>3</sub>, <sup>2</sup>J = 7.8 Hz, 1H), 1.76 (m, CH<sub>2</sub>-C-CH<sub>2</sub>, 4H), 1.26 (d, CH<sub>3</sub>, <sup>3</sup>J = 6.1 Hz, 3H) MS *m/z* (APCI) 217.1 [M+H<sup>+</sup>].

**BTZ043** 2-Chloro-3-nitro-5-(trifluoromethyl)benzoic acid chloride is prepared from 2-chloro-3-nitro-5-(trifluoromethyl)benzoic acid (0.57 g, 0.21 mmol, 1.0 eq.) by general procedure A, replacing toluene with anisole. **BTZ043** is synthesised by general procedure C in anisole in place of toluene, using (2S)-2-methyl-1,4-dioxo-8-azaspiro[4.5]decane-8-thiourea (**29b**) (0.47 g, 0.21 mmol, 1.0 eq.). The crude product is purified chromatographically (LM TBME). The title compound appears as a yellow solid (66 mg 73 %, HPLC purity 100.0 %, *t<sub>R</sub>* = 14.2 min). <sup>1</sup>H-NMR (400 MHz, CDCl<sub>3</sub>) δ 9.08 (d, Ar-H, <sup>3</sup>J = 1.6 Hz, 1H), 8.74 (d, Ar-H, <sup>3</sup>J = 1.8 Hz, 1H), 4.29 (m, CH<sub>2</sub>-CH-CH<sub>3</sub>, 1H), 4.11 (dd, CH<sub>2</sub>-CH-CH<sub>3</sub>, <sup>2</sup>J = 8.0 Hz, 1H), 4.05 (m, CH<sub>2</sub>-N-CH<sub>2</sub>, 4H), 3.50 (t, CH<sub>2</sub>-CH-CH<sub>3</sub>, <sup>2</sup>J = 8.0 Hz, 1H), 1.85 (m, CH<sub>2</sub>-C-CH<sub>2</sub>, 4H), 1.31 (d, CH<sub>3</sub>, <sup>3</sup>J = 6.1 Hz, 3H) <sup>13</sup>C-NMR (125 Hz, CDCl<sub>3</sub>) δ 166.5, 161.8, 143.9, 134.1, 133.3, 129.6 (q, <sup>2</sup>J<sub>C,F</sub> = 35.1 Hz), 126.6, 125.9, 122.4 (q, <sup>1</sup>J<sub>C,F</sub> = 273.1 Hz), 106.3, 72.5, 70.9, 44.6, 36.4, 35.2, 18.3 HRMS *m/z* calc for C<sub>17</sub>H<sub>17</sub>F<sub>3</sub>N<sub>3</sub>O<sub>5</sub>S [M+H<sup>+</sup>], 432.0837; found, 432.0829, calc for C<sub>17</sub>H<sub>16</sub>F<sub>3</sub>N<sub>3</sub>O<sub>5</sub>SNa [M+Na<sup>+</sup>], 454.0656; found, 454.0646.

*Morpholine-4-carboxamide* (**30a**) 1.0 g (16.70 mmol) urea were dissolved in 20 ml morpholine and refluxed for 40 h, until release of ammonia stopped. The amine was removed under reduced pressure and the resulting oily residue recrystallized from hexane:chloroform (approx. 1:2 (V/V)). Pale yellow crystals were collected and dried (1.64 g 76 %). <sup>1</sup>H-NMR

(500 MHz, CDCl<sub>3</sub>)  $\delta$  4.53 (bs, 2H, NH<sub>2</sub>), 3.69 (m, 4H, CH<sub>2</sub>-O-CH<sub>2</sub>), 3.38 (m, 4H, CH<sub>2</sub>-N-CH<sub>2</sub>) MS  $m/z$  (EI) 130 (M).

*2-(Morpholin-4-yl)-8-nitro-6-(trifluoromethyl)-4H-1,3-benzoxazin-4-one (30b)* Synthesis of 2-chloro-3-nitro-5-(trifluoromethyl)benzoylchloride according to general procedure A from 250 mg (0.93 mmol) 2-chloro-3-nitro-5-(trifluoromethyl)benzoic acid. 151 mg (1.16 mmol) morpholine-4-carboxamide (**30a**) and 158  $\mu$ l (0.93 mmol) DIPEA were dissolved in 30 ml toluene and heated to 70 °C. 2-chloro-3-nitro-5-(trifluoromethyl)benzoylchloride was dissolved in 4 ml toluene and added dropwise. Upon complete addition, the mixture was refluxed for 2.5 h. After cooling, the solvent was removed under reduced pressure and the crude product purified by flash chromatography (eluent TBME). The title compound appears as a pale-yellow solid (111 mg 35 %, HPLC purity 99.3 %,  $t_R$  = 11.1 min). <sup>1</sup>H-NMR (400 MHz, CDCl<sub>3</sub>)  $\delta$  8.71 (d, 1H, Ar-H, <sup>4</sup> $J$  = 2.3 Hz), 8.59 (d, 1H, Ar-H, <sup>4</sup> $J$  = 2.3 Hz), 3.93 (m, 4H, CH<sub>2</sub>-N-CH<sub>2</sub>), 3.83 (m, 4H, CH<sub>2</sub>-O-CH<sub>2</sub>) <sup>13</sup>C-NMR (100 MHz, CDCl<sub>3</sub>)  $\delta$  162.9, 155.4, 148.5, 136.3, 131.1 (q, <sup>3</sup> $J_{C,F}$  = 3.4 Hz), 127.8 (q, <sup>2</sup> $J_{C,F}$  = 35.9 Hz), 127.1 (q, <sup>3</sup> $J_{C,F}$  = 3.4 Hz), 122.1 (q, <sup>1</sup> $J_{C,F}$  = 273.1 Hz), 120.3, 66.2, 66.1, 45.4, 45.0 HRMS  $m/z$  calc for C<sub>13</sub>H<sub>11</sub>F<sub>3</sub>N<sub>3</sub>O<sub>5</sub> [M+H<sup>+</sup>], 346.0650; found, 346.0649, calc for C<sub>13</sub>H<sub>10</sub>F<sub>3</sub>N<sub>3</sub>O<sub>5</sub>Na [M+Na<sup>+</sup>], 368.0466; found, 368.0467.

*1,2,3,4-Tetrahydroisoquinoline-2-carboxamide (31a)* Tetrahydroisoquinoline (1.000 g, 7.51 mmol, 2 eq.) and urea (0.225 g, 3.76 mmol, 1 eq.) are heated in a flask for 42 h at 120 °C (clear brown colouration). The crude product is worked up by recrystallisation from chloroform/hexane (1:1). The title compound appears as a brownish solid (479 mg 72 %). <sup>1</sup>H-NMR (400 MHz, DMSO-*d*<sub>6</sub>)  $\delta$  7.13 (m, Ar-H, 4H), 6.00 (bs, NH<sub>2</sub>, 2H), 4.45 (s, N-CH<sub>2</sub>, 2H), 3.50 (t, N-CH<sub>2</sub>, <sup>3</sup> $J$  = 5.9 Hz, 2H), 2.74 (t, CH<sub>2</sub>, <sup>3</sup> $J$  = 5.9 Hz, 2H) MS  $m/z$  (APCI) 177.1 [M+H<sup>+</sup>].

*8-Nitro-2-(1,2,3,4-tetrahydroisoquinolin-2-yl)-6-(trifluoromethyl)-4H-1,3-benzoxazin-4-one (31b)* 2-Chloro-3-nitro-5-(trifluoromethyl)benzoic acid chloride is prepared from 2-chloro-3-



nitro-5-(trifluoromethyl)benzoic acid (0.337 g, 1.25 mmol, 1.25 eq.) by general procedure A. 2-Chloro-3-nitro-5-(trifluoromethyl)benzoic acid chloride is dissolved in toluene (5 ml) and slowly added to a solution of 1,2,3,4-tetrahydroisoquinoline-2-carboxamide (**31a**) (0.200 g, 1.13 mmol, 1.0 eq.) and DIPEA (0.438 ml, 3.39 mmol, 3 eq.) in toluene at 70 °C. After 1 h reflux, the reaction is cooled overnight and the solvent was removed under vacuum. Purification is carried out by flash chromatography with the solvent chloroform. Subsequently, the reaction product is recrystallised from EtAc/hexane (1:1). The title compound appears as a pale yellowish solid (227 mg 58 %, HPLC purity 98.1 %,  $t_R$  = 14.3 min).  $^1\text{H-NMR}$  (400 MHz,  $\text{CDCl}_3$ )  $\delta$  8.74 (s, Ar-H, 1H), 8.61 (s, Ar-H, 1H), 7.23 (m, Ar-H, 4H), 5.03 (d,  $\text{CH}_2$ ,  $^2J$  = 8.0 Hz, 2H), 4.13 (m,  $\text{CH}_2$ , 2H), 3.80 (s,  $\text{CH}_3$ , 3H), 3.06 (m,  $\text{CH}_2$ , 2H)  $^{13}\text{C-NMR}$  (100 MHz,  $\text{CDCl}_3$ )  $\delta$  163.1, 162.9, 155.6, 155.5, 148.6, 136.3, 133.8, 133.4, 131.3, 131.1 (q,  $^3J_{\text{C,F}}$  = 3.8 Hz), 130.9, 128.7, 128.4, 127.6, 127.5 (q,  $^2J_{\text{C,F}}$  = 36.2 Hz), 127.4, 127.1, 127.0 (q,  $^3J_{\text{C,F}}$  = 3.8 Hz), 126.9, 126.5, 126.4, 122.2 (q,  $^1J_{\text{C,F}}$  = 272.8 Hz), 120.3, 47.1, 46.4, 43.6, 42.8, 28.6, 28.0 HRMS  $m/z$  calc for  $\text{C}_{18}\text{H}_{13}\text{F}_3\text{N}_3\text{O}_4$  [ $\text{M}+\text{H}^+$ ], 392.0854; found, 392.0858.

*Nitro-2-(1,2,3,4-tetrahydroisoquinolin-2-yl)-6-(trifluoromethyl)-1,4-dihydrochinazolin-4-one* (**32a**) 2-Chloro-3-nitro-5-(trifluoromethyl)benzoic acid chloride is prepared from 2-chloro-3-nitro-5-(trifluoromethyl)benzoic acid (0.098 g, 0.36 mmol, 1.1 eq.) by general procedure A. **32a** is synthesised by general procedure C, using 1,2,3,4-tetrahydroisoquinoline-2-guanidine hydroiodide (0.100 g, 0.33 mmol, 1.0 eq.). For a complete reaction, diazabicycloundecene (DBU) (0.039 g, 0.27 mmol, 0.82 eq.) is added as auxiliary base and the reaction is boiled for 3 h in toluene under reflux. The crude product is purified by flash chromatography (chloroform/MeOH 99:1). The title compound appears as a yellow solid (10 mg 8 %, HPLC purity 100.0 %,  $t_R$  = 15.3 min).  $^1\text{H-NMR}$  (400 MHz,  $\text{CDCl}_3$ )  $\delta$  8.55 (s, Ar-H, 1H), 8.29 (s, Ar-H, 1H), 7.26 (m, Ar-H, 4H), 4.99 (bs, N- $\text{CH}_2$ , 2H), 4.07 (t, N- $\text{CH}_2$ ,  $^3J$  = 5.7 Hz, 2H), 3.08 (t,  $\text{CH}_2$ ,  $^3J$  = 5.7 Hz,

2H)  $^{13}\text{C}$ -NMR (100 MHz,  $\text{CDCl}_3$ )  $\delta$  163.4, 151.3, 134.2, 131.7 (q,  $^3J_{\text{C,F}} = 3.1$  Hz), 128.7, 128.4, 127.6, 127.0, 126.6 (q,  $^3J_{\text{C,F}} = 3.8$  Hz), 126.4, 123.4, 122.9 (q,  $^1J_{\text{C,F}} = 271.6$  Hz), 122.8, 118.6, 46.6, 42.9, 28.5 HRMS  $m/z$  calc for  $\text{C}_{18}\text{H}_{14}\text{F}_3\text{N}_4\text{O}_3$  [ $\text{M}+\text{H}^+$ ], 391.1013; found, 391.1002, calc for  $\text{C}_{18}\text{H}_{13}\text{F}_3\text{N}_4\text{O}_3\text{Na}$  [ $\text{M}+\text{Na}^+$ ], 413.0833; found, 413.0821.

*4-(Cyclohexylmethyl)piperazine-1-carboxamide* (**33a**) Cyclohexylmethylpiperazine (0.500 g, 2.73, 2 eq.) and urea (0.082 g, 1.37 mmol, 1 eq.) are added to a flask and heated to 120 °C for 42 h (clear brown colouration). The crude product was purified up by flash chromatography with the eluent chloroform/MeOH/ammonia 36 % (95:5:1). The title compound appears as a brownish solid (308 mg 100 %).  $^1\text{H}$ -NMR (400 MHz,  $\text{CDCl}_3$ )  $\delta$  4.55 (m,  $\text{NH}_2$ , 2H), 3.37 (m,  $\text{CH}_2\text{-N-CH}_2$ , 4H), 2.36 (m,  $\text{CH}_2\text{-N-CH}_2$ , 4H), 2.11 (d,  $\text{N-CH}_2\text{-CH}$ ,  $^3J = 7.0$  Hz, 2H), 1.70 (m, cyclohexyl, 5H), 1.47 (m,  $\text{N-CH}_2\text{-CH}$ , 1H), 1.18 (m, cyclohexyl, 3H), 0.86 (m, cyclohexyl, 2H)

*2-[4-(Cyclohexylmethyl)piperazin-1-yl]-8-nitro-6-(trifluoromethyl)-4H-1,3-benzoxazin-4-one* (**33b**) 2-Chloro-3-nitro-5-(trifluoromethyl)benzoic acid chloride is prepared from 2-chloro-3-nitro-5-(trifluoromethyl)benzoic acid (0.266 g, 0.98 mmol, 1.0 eq.) by general procedure A. The carboxylic acid chloride is dissolved in toluene (5 ml) and slowly added to a solution of 4-(cyclohexylmethyl)piperazine-1-carboxamide (**33a**) (0.200 g, 0.89 mmol, 0.9 eq.) and DIPEA (0.499 ml, 2.94 mmol, 3 eq.) in toluene at 70 °C. After refluxing for 1 h, the reaction cooled overnight. The purification was carried out column chromatographically with the solvent medium chloroform/MeOH (98:2). The title compound appears as a brownish solid (162 mg 41 %, HPLC purity 95.8 %,  $t_{\text{R}} = 11.3$  min).  $^1\text{H}$ -NMR (400 MHz,  $\text{CDCl}_3$ )  $\delta$  8.58 (d, Ar-H,  $^4J = 2.3$ , 1H), 8.45 (d, Ar-H,  $^4J = 2.2$ , 1H), 3.81 (m,  $\text{CH}_2\text{-N-CH}_2$ , 4H), 2.41 (m,  $\text{CH}_2\text{-N-CH}_2$ , 4H), 2.06 (m,  $\text{N-CH}_2\text{-CH}$ , 2H), 1.60 (m, cyclohexyl, 5H), 1.38 (m,  $\text{N-CH}_2\text{-CH}$ , 1H) 1.08 (m, cyclohexyl, 3H), 0.75 (m, cyclohexyl, 2H)  $^{13}\text{C}$ -NMR (125 MHz,  $\text{CDCl}_3$ )  $\delta$  163.0, 155.2, 148.6, 136.2, 131.0 (q,  $^3J_{\text{C,F}} = 3.8$  Hz), 127.5 (q,  $^2J_{\text{C,F}} = 35.3$  Hz), 127.0 (q,  $^3J_{\text{C,F}} = 3.8$  Hz), 122.1 (q,  $^1J_{\text{C,F}} = 273.3$  Hz), 120.3,

65.1, 53.0, 52.5, 45.2, 44.7, 34.9, 31.7, 26.6, 26.0 HRMS  $m/z$  calc for  $C_{20}H_{23}F_3N_4O_4$   $[M+H]^+$ ,  
441.1745; found, 441.1740

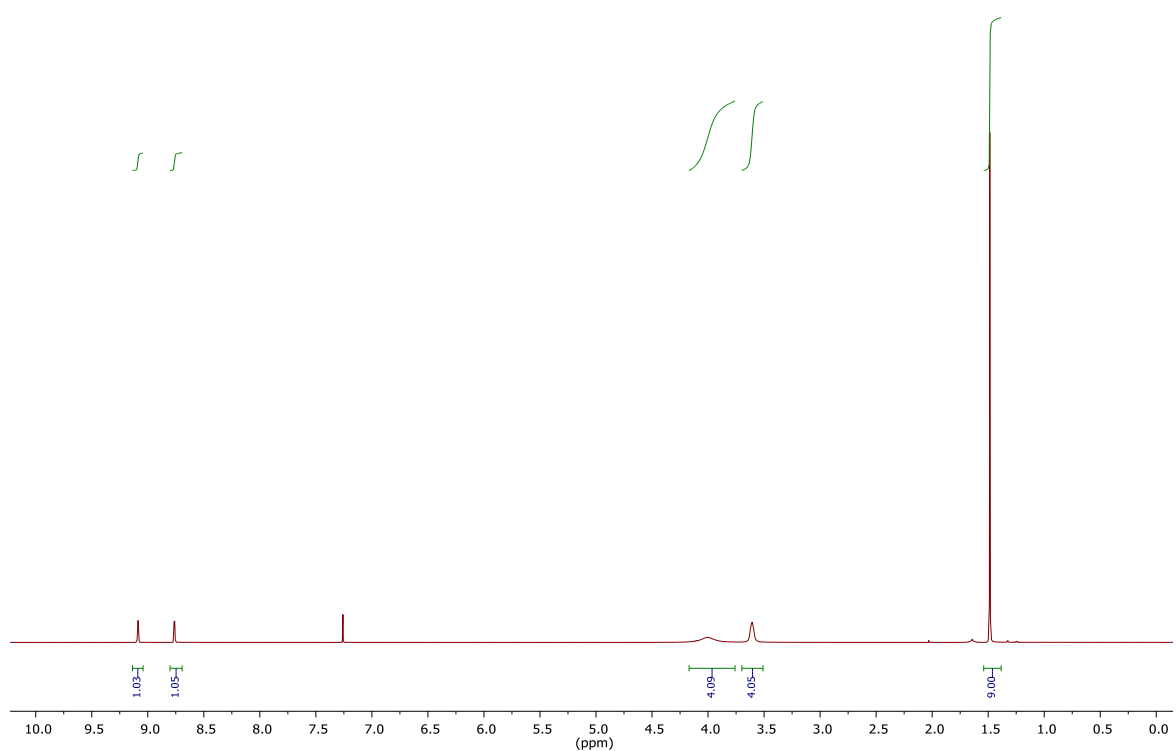

Figure S1A  $^1\text{H-NMR}$  (400 MHz) of **1c** in  $\text{CDCl}_3$ .

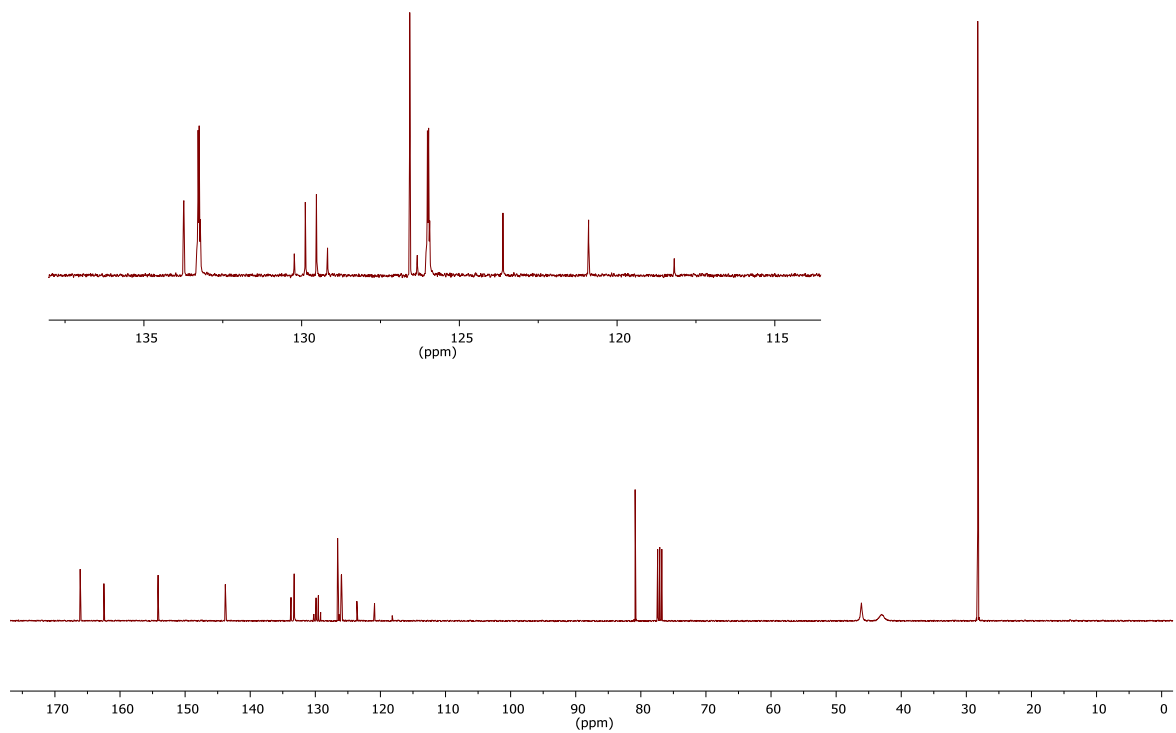

Figure S1B  $^{13}\text{C-NMR}$  (100 MHz) of **1c** in  $\text{CDCl}_3$ .

Sample Information

Sample Name :  
 Tray# : 1  
 Vial# : 12  
 Injection Volume : 5  
 Data File : AR210.lcd  
 Method File : MSP5-95\_30min\_1.0.lcm  
 Batch File : Batch170521\_2.lcb  
 Report Format File : Reportformat1.lsr  
 Date Acquired : 17.05.2021 18:56:13  
 Date Processed : 17.05.2021 19:26:15

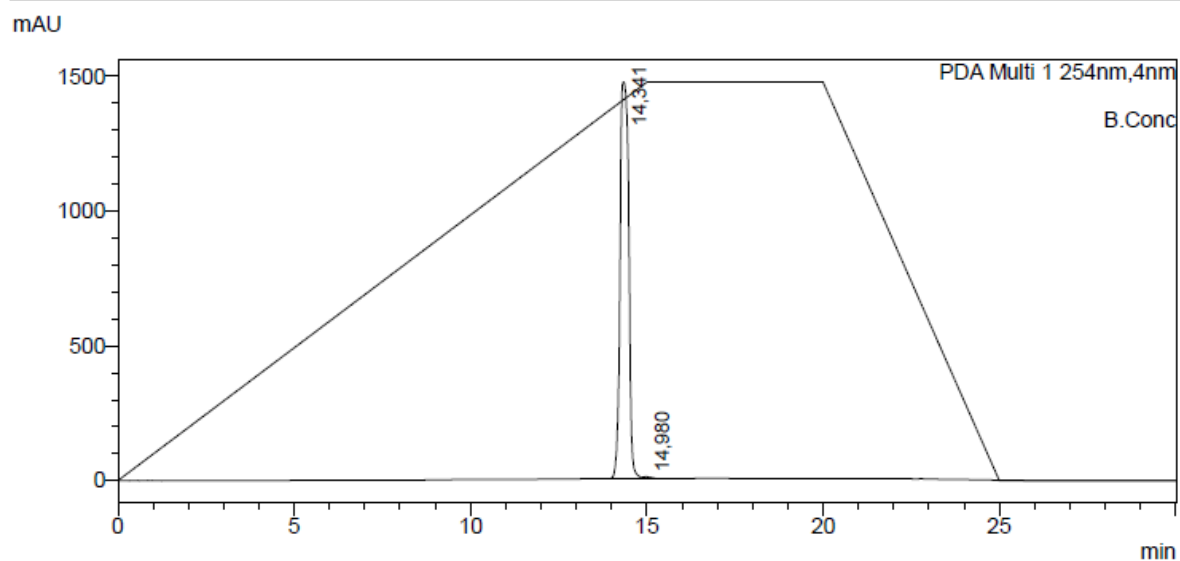

PDA Ch1 254nm

| Peak# | Ret. Time | Area     | Height  | Area%   |
|-------|-----------|----------|---------|---------|
| 1     | 14,341    | 25137137 | 1470453 | 99,861  |
| 2     | 14,980    | 34897    | 3878    | 0,139   |
| Total |           | 25172034 | 1474330 | 100,000 |

Figure S1C HPLC chromatogram of **1c**.

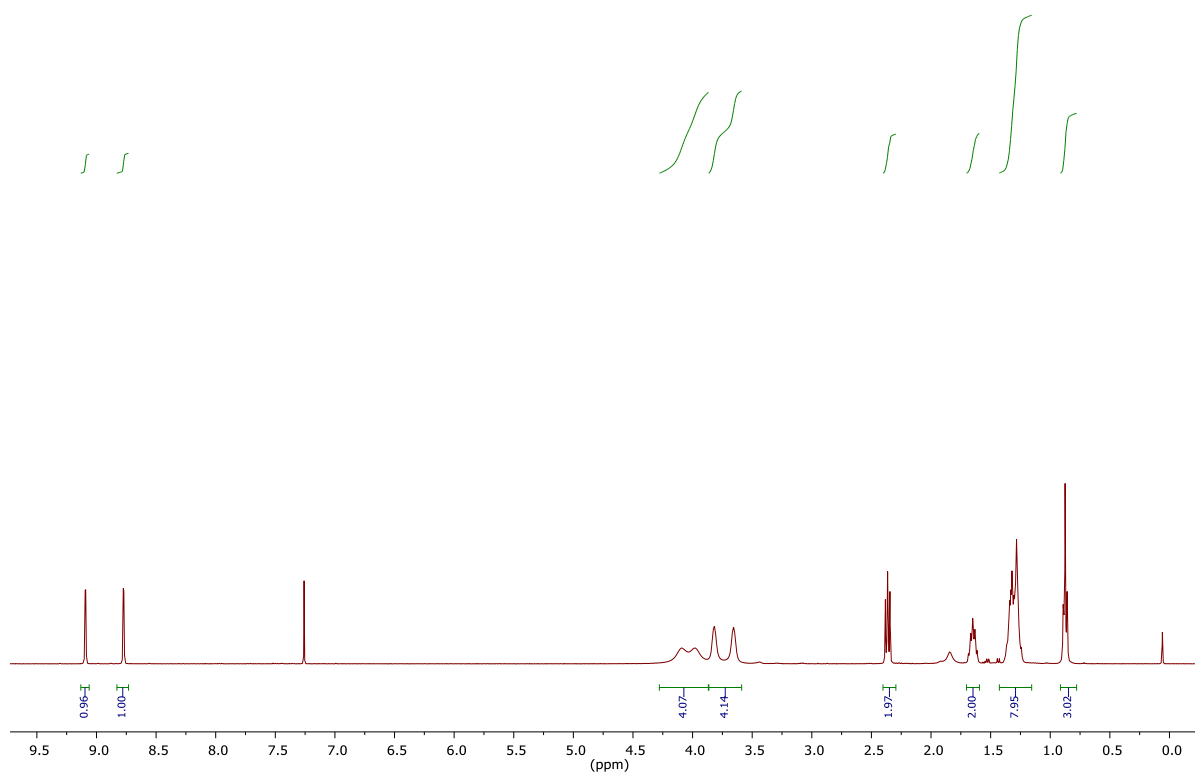

Figure S2A  $^1\text{H-NMR}$  (400 MHz) of **1e** in  $\text{CDCl}_3$ .

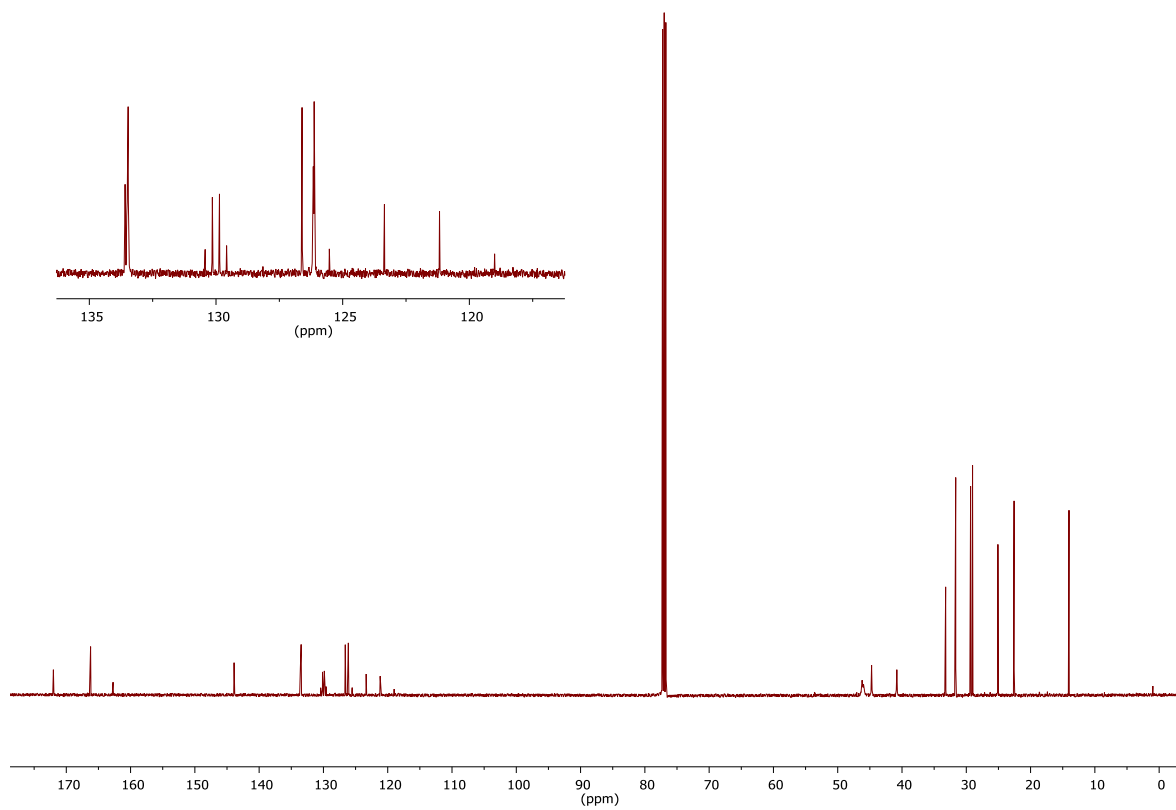

Figure S2B  $^{13}\text{C-NMR}$  (100 MHz,  $\text{CDCl}_3$ ) of **1e** in  $\text{CDCl}_3$ .

Sample Information

Sample Name :  
 Tray# : 1  
 Vial# : 7  
 Injection Volume : 5  
 Data File : AR213.lcd  
 Method File : MSP5-95\_30min\_1.0.lcm  
 Batch File : Batch170521\_2.lcb  
 Report Format File : Reportformat1.lsr  
 Date Acquired : 17.05.2021 16:23:32  
 Date Processed : 17.05.2021 16:53:34

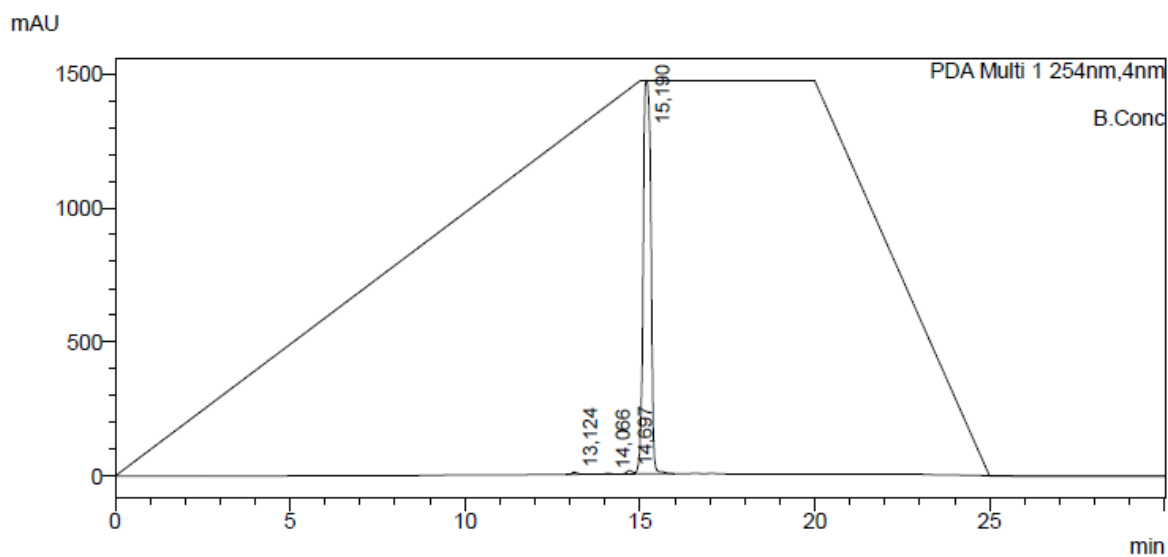

PDA Ch1 254nm

| Peak# | Ret. Time | Area     | Height  | Area%   |
|-------|-----------|----------|---------|---------|
| 1     | 13,124    | 84765    | 7719    | 0,376   |
| 2     | 14,066    | 37343    | 2946    | 0,166   |
| 3     | 14,697    | 138160   | 12527   | 0,613   |
| 4     | 15,190    | 22291013 | 1464792 | 98,846  |
| Total |           | 22551281 | 1487985 | 100,000 |

Figure S2C HPLC chromatogram of **1e**.

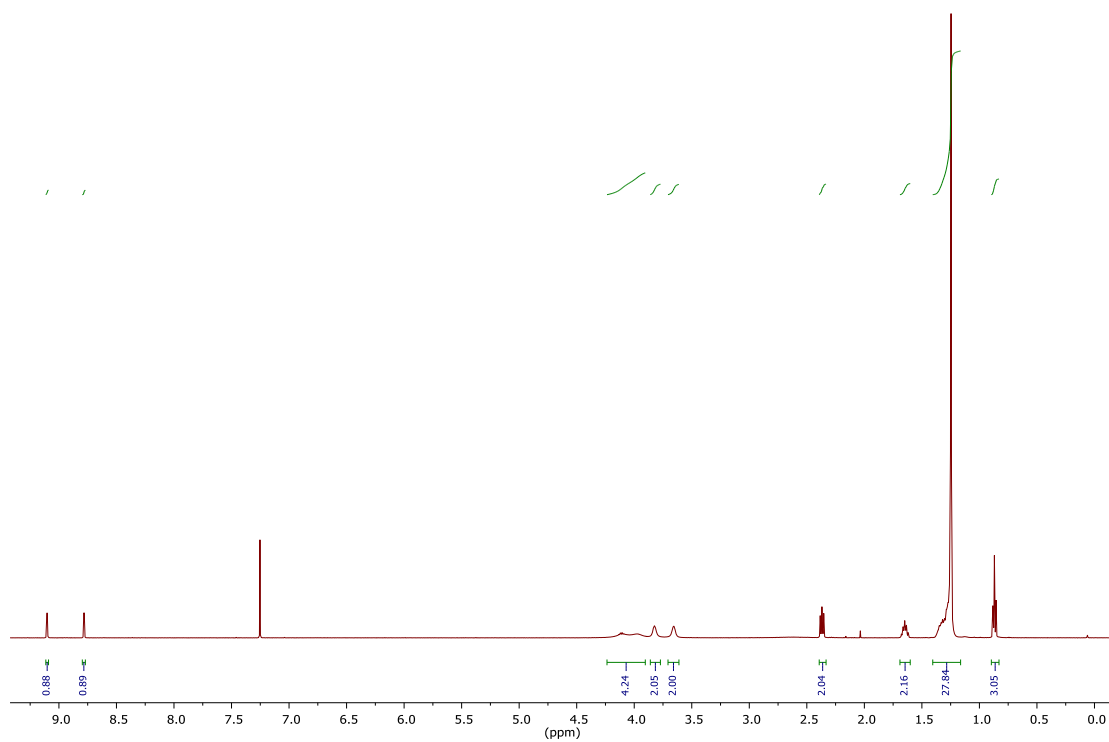

Figure S3A  $^1\text{H-NMR}$  (500 MHz) of **2a** in  $\text{CDCl}_3$ .

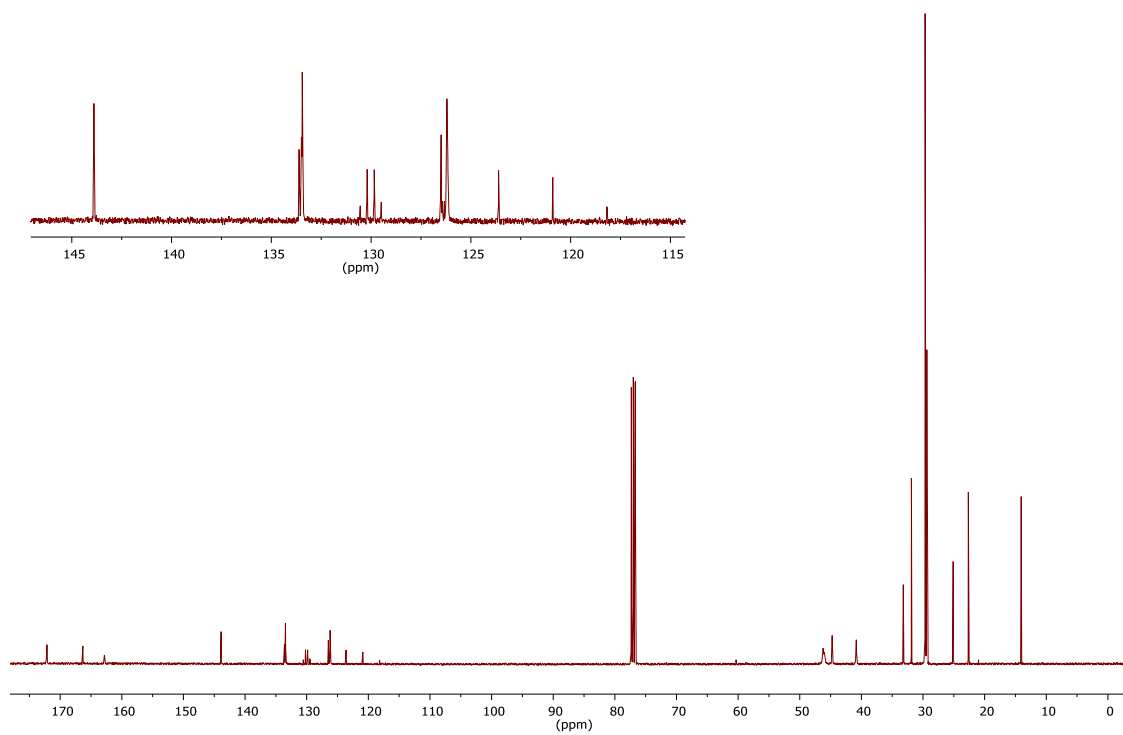

Figure S3B  $^{13}\text{C-NMR}$  (100 MHz) of **2a** in  $\text{CDCl}_3$ .



Sample Information

Sample Name :  
 Tray# : 1  
 Vial# : 9  
 Injection Volume : 5  
 Data File : AR214.lcd  
 Method File : MSP5-95\_30min\_1.0.lcm  
 Batch File : Batch170521\_2.lcb  
 Report Format File : Reportformat1.lsr  
 Date Acquired : 17.05.2021 17:24:35  
 Date Processed : 17.05.2021 17:54:38

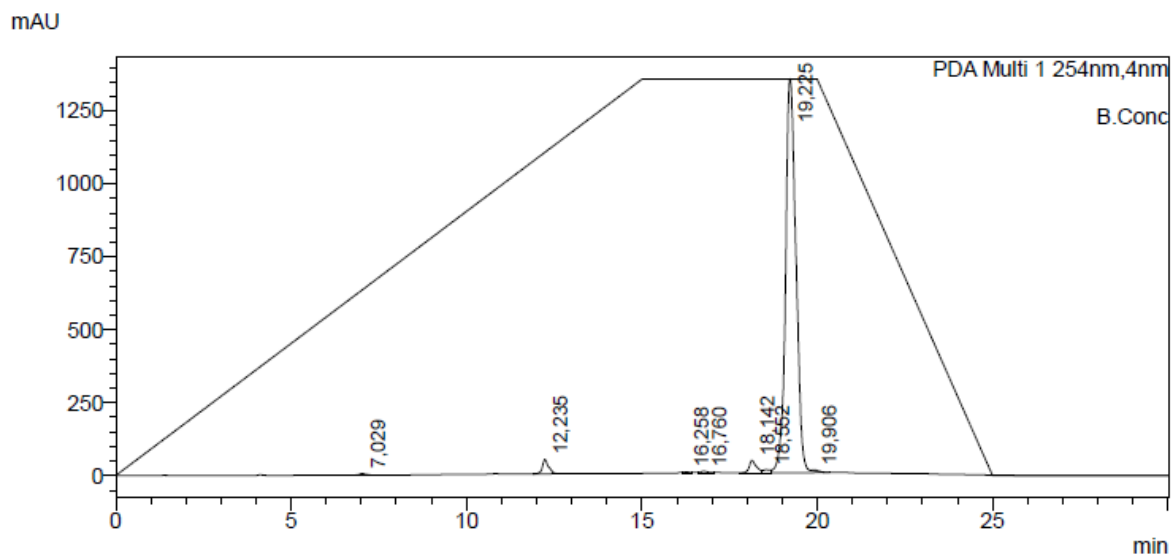

PDA Ch1 254nm

| Peak# | Ret. Time | Area     | Height  | Area%   |
|-------|-----------|----------|---------|---------|
| 1     | 7,029     | 61048    | 5607    | 0,207   |
| 2     | 12,235    | 610495   | 49008   | 2,075   |
| 3     | 16,258    | 45379    | 3848    | 0,154   |
| 4     | 16,760    | 81057    | 5442    | 0,276   |
| 5     | 18,142    | 602920   | 42867   | 2,049   |
| 6     | 18,552    | 139963   | 10605   | 0,476   |
| 7     | 19,225    | 27850638 | 1348642 | 94,661  |
| 8     | 19,906    | 29829    | 3075    | 0,101   |
| Total |           | 29421329 | 1469094 | 100,000 |

Figure S3C HPLC chromatogram of **2a**.

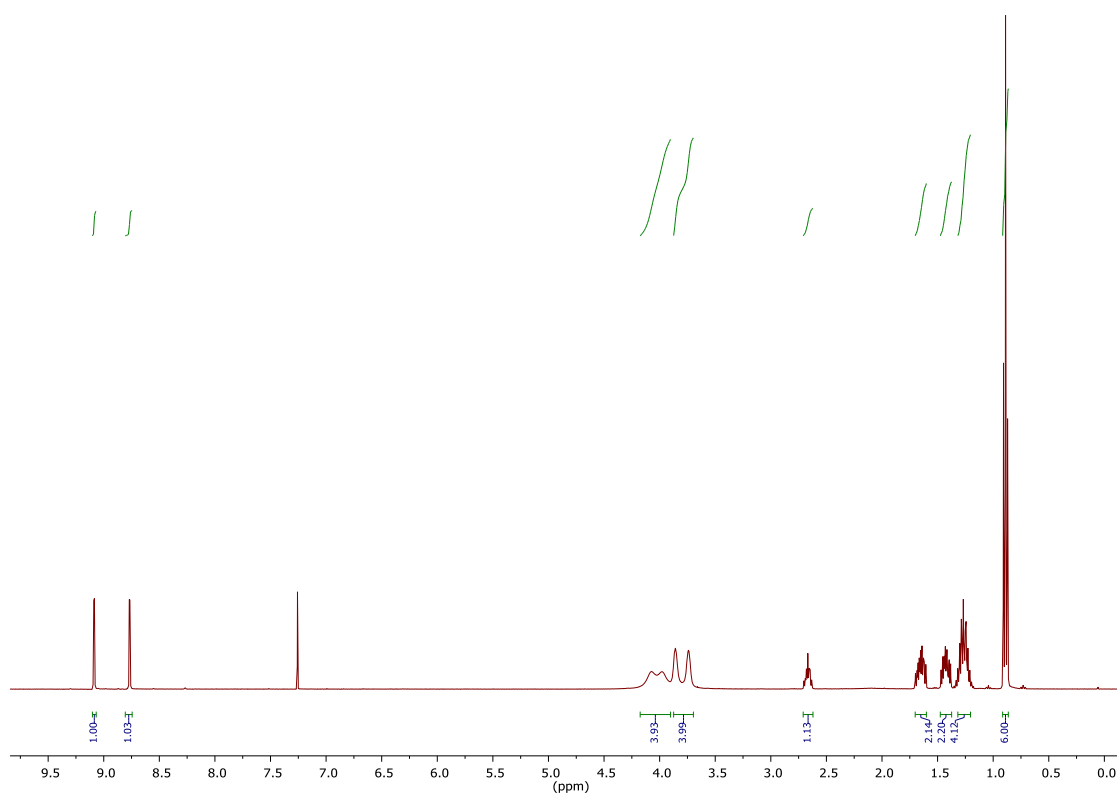

Figure S4A  $^1\text{H-NMR}$  (400 MHz) of **3c** in  $\text{CDCl}_3$ .

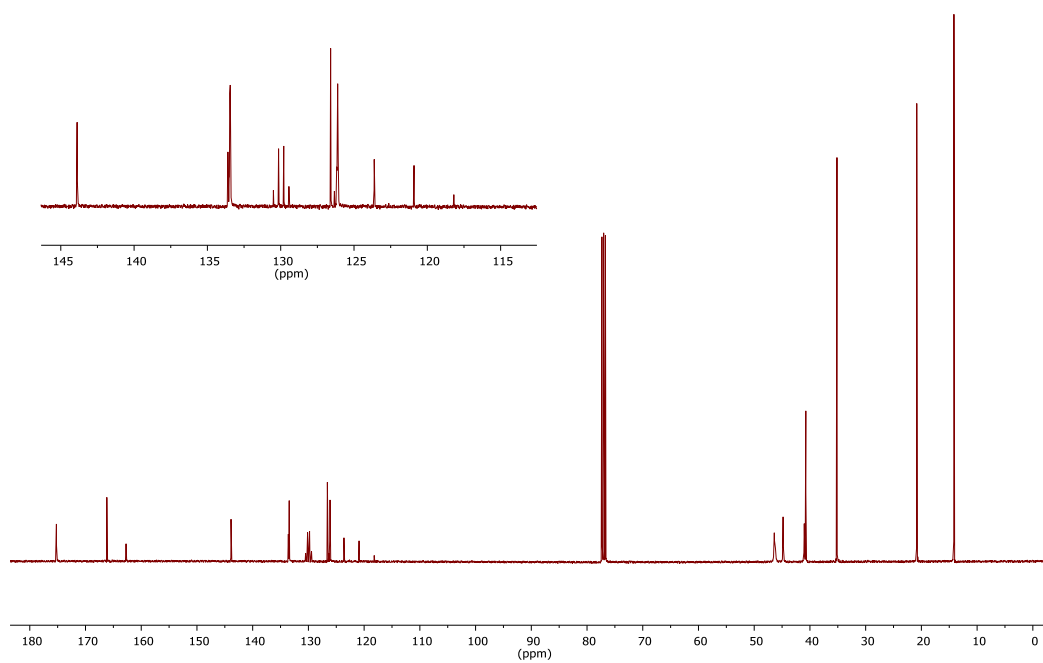

Figure S4B  $^{13}\text{C-NMR}$  (100 MHz) of **3c** in  $\text{CDCl}_3$ .

Sample Information

Sample Name :  
 Tray# : 1  
 Vial# : 10  
 Injection Volume : 5  
 Data File : AR154.lcd  
 Method File : MSP5-95\_30min\_1.0.lcm  
 Batch File : Batch170521\_2.lcb  
 Report Format File : Reportformat1.lsr  
 Date Acquired : 17.05.2021 17:55:07  
 Date Processed : 17.05.2021 18:25:10

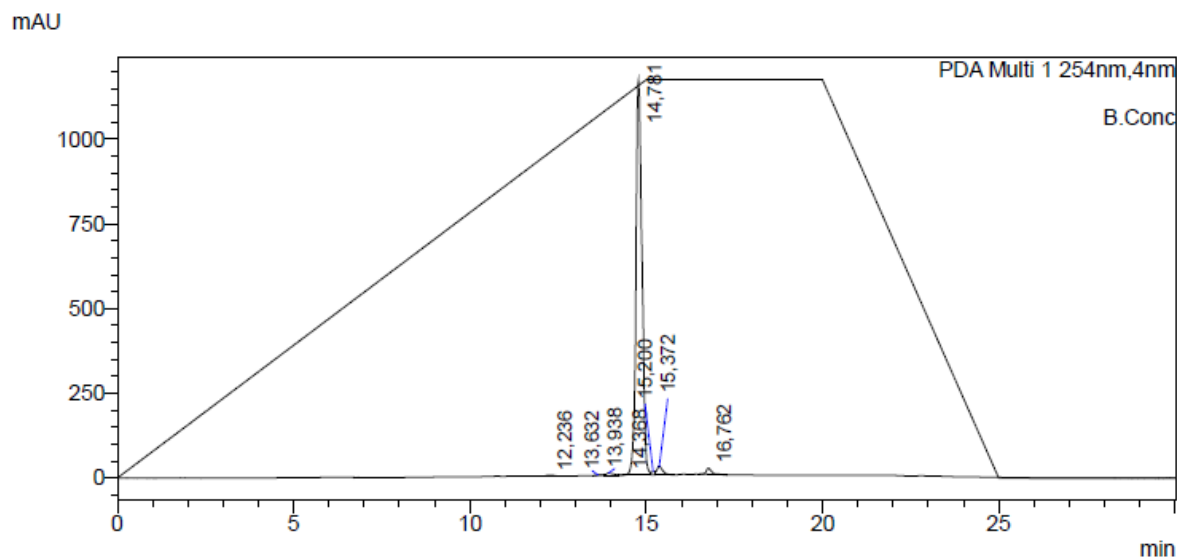

PDA Ch1 254nm

| Peak# | Ret. Time | Area     | Height  | Area%   |
|-------|-----------|----------|---------|---------|
| 1     | 12,236    | 34631    | 2418    | 0,238   |
| 2     | 13,632    | 15776    | 1423    | 0,109   |
| 3     | 13,938    | 89297    | 6815    | 0,614   |
| 4     | 14,368    | 20797    | 2273    | 0,143   |
| 5     | 14,781    | 13833400 | 1166841 | 95,190  |
| 6     | 15,200    | 64034    | 9523    | 0,441   |
| 7     | 15,372    | 281308   | 25621   | 1,936   |
| 8     | 16,762    | 193110   | 18173   | 1,329   |
| Total |           | 14532354 | 1233086 | 100,000 |

Figure S4C HPLC chromatogram of **3c**.

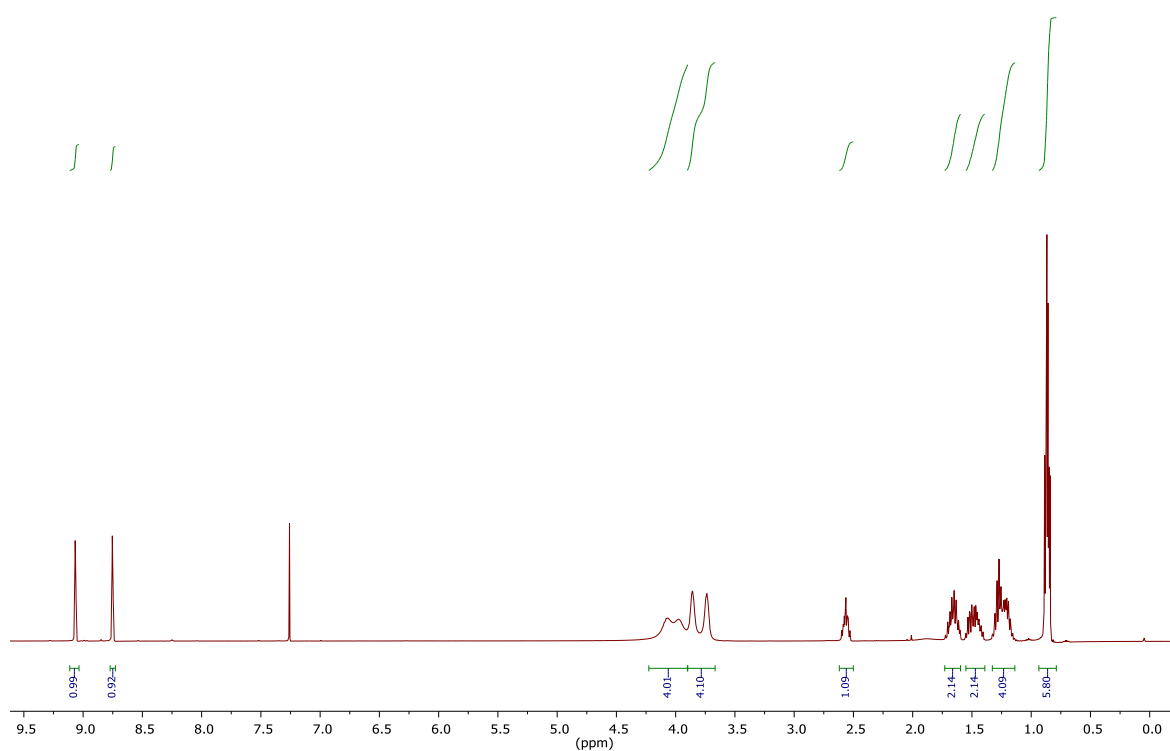

Figure S5A  $^1\text{H-NMR}$  (400 MHz) of **4c** in  $\text{CDCl}_3$ .

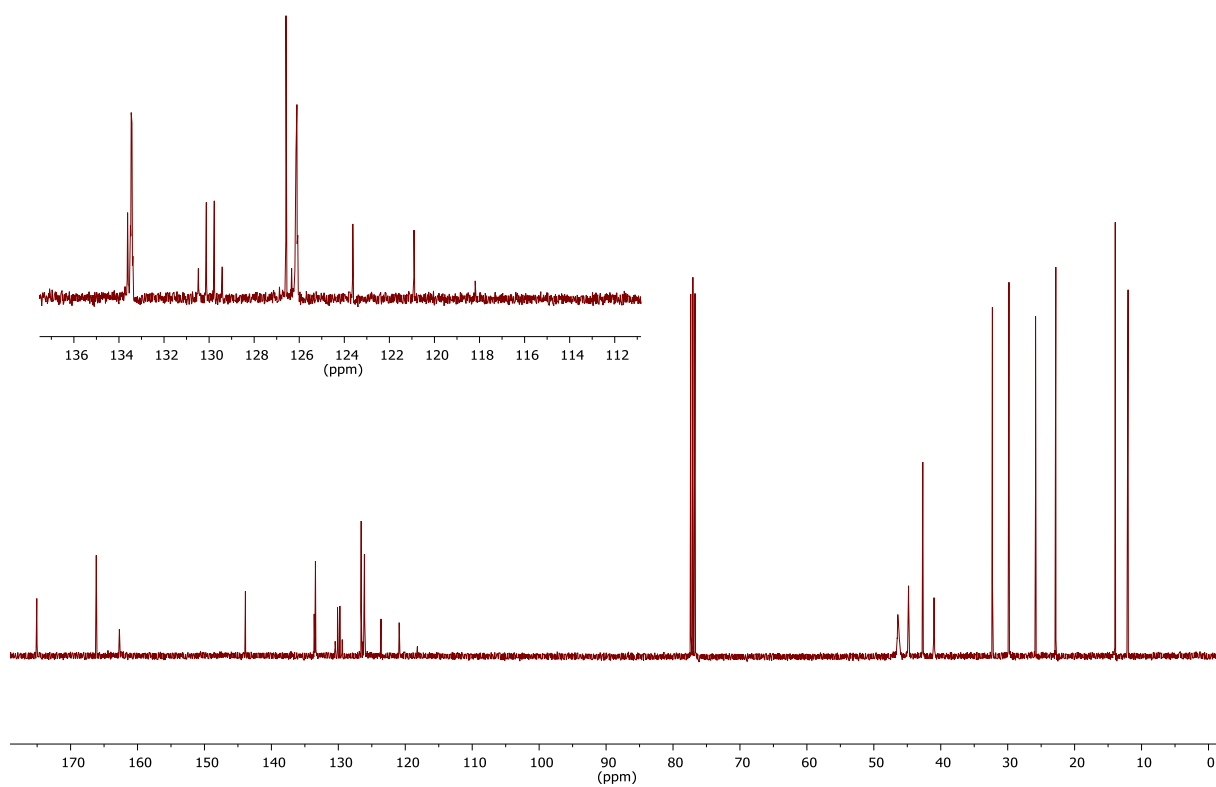

Figure S5B  $^{13}\text{C-NMR}$  (100 MHz) of **4c** in  $\text{CDCl}_3$ .

Sample Information

Sample Name :  
 Tray# : 1  
 Vial# : 21  
 Injection Volume : 5  
 Data File : AR158.lcd  
 Method File : MSP5-95\_30min\_1.0.lcm  
 Batch File : Batch170521\_2.lcb  
 Report Format File : Reportformat1.lsr  
 Date Acquired : 17.05.2021 23:30:55  
 Date Processed : 18.05.2021 00:00:57

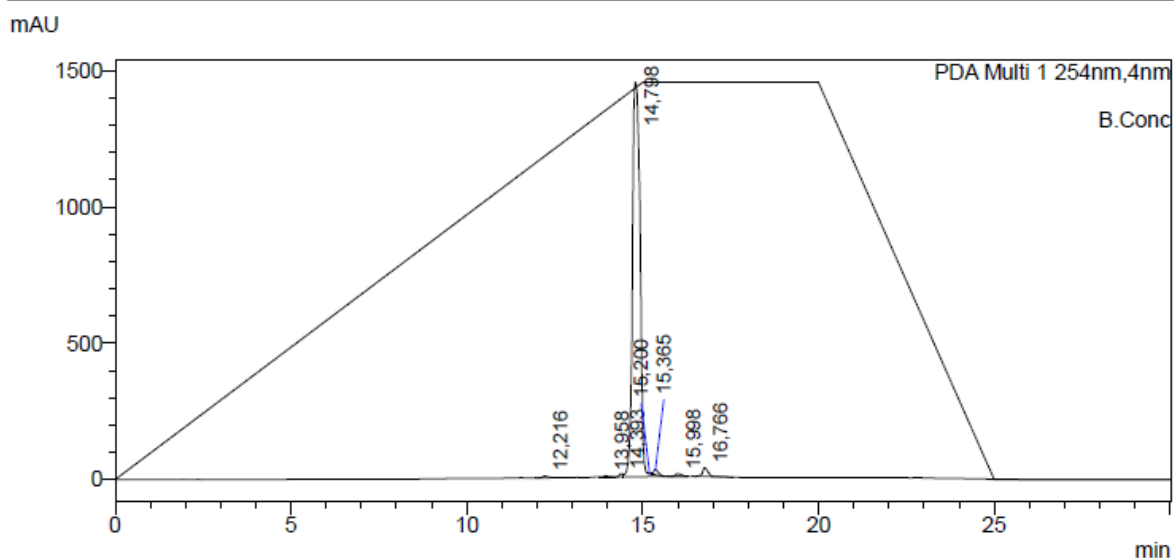

PDA Ch1 254nm

| Peak# | Ret. Time | Area     | Height  | Area%   |
|-------|-----------|----------|---------|---------|
| 1     | 12,216    | 85894    | 7013    | 0,379   |
| 2     | 13,958    | 60433    | 4854    | 0,267   |
| 3     | 14,393    | 96290    | 11703   | 0,425   |
| 4     | 14,798    | 21754324 | 1446670 | 95,943  |
| 5     | 15,200    | 5220     | 1305    | 0,023   |
| 6     | 15,365    | 176274   | 19463   | 0,777   |
| 7     | 15,998    | 121540   | 10375   | 0,536   |
| 8     | 16,766    | 374279   | 32909   | 1,651   |
| Total |           | 22674254 | 1534293 | 100,000 |

Figure S5C HPLC chromatogram of **4c**.

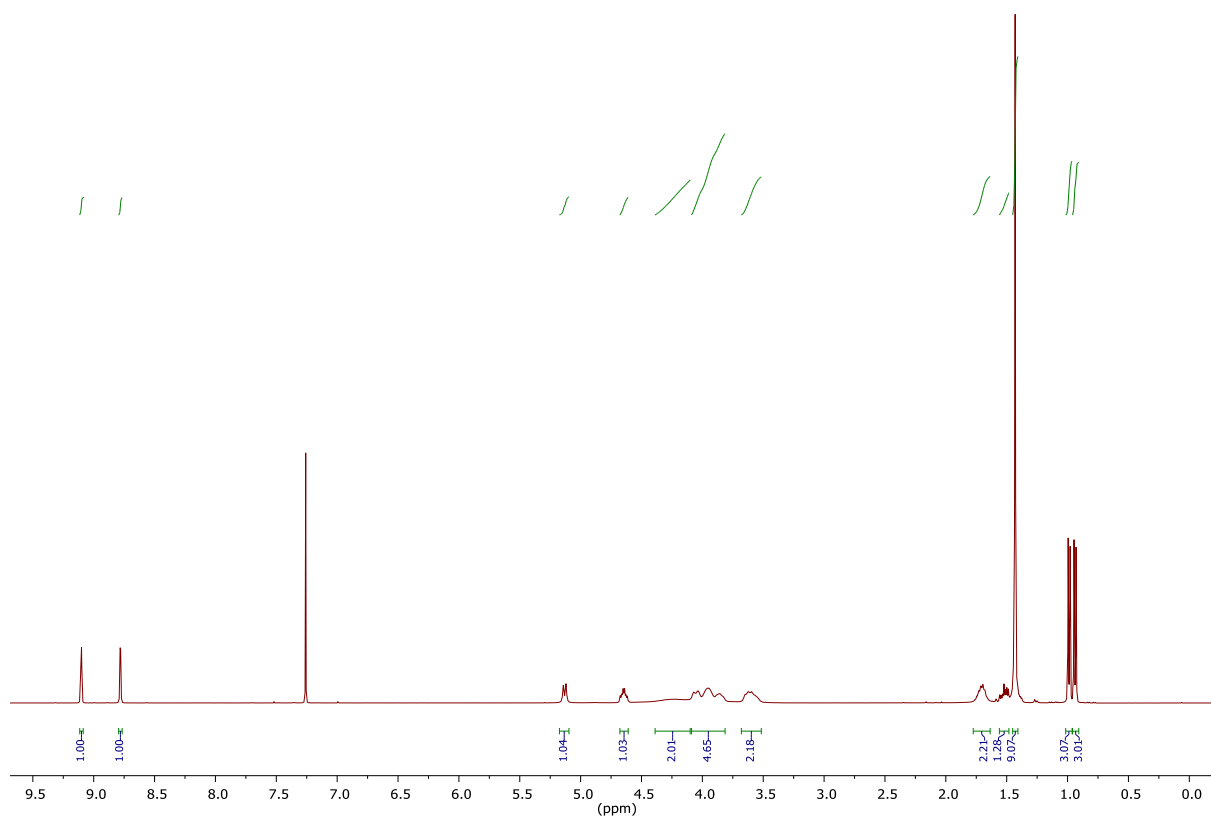

Figure S6A  $^1\text{H-NMR}$  (400 MHz) of **5c** in  $\text{CDCl}_3$ .

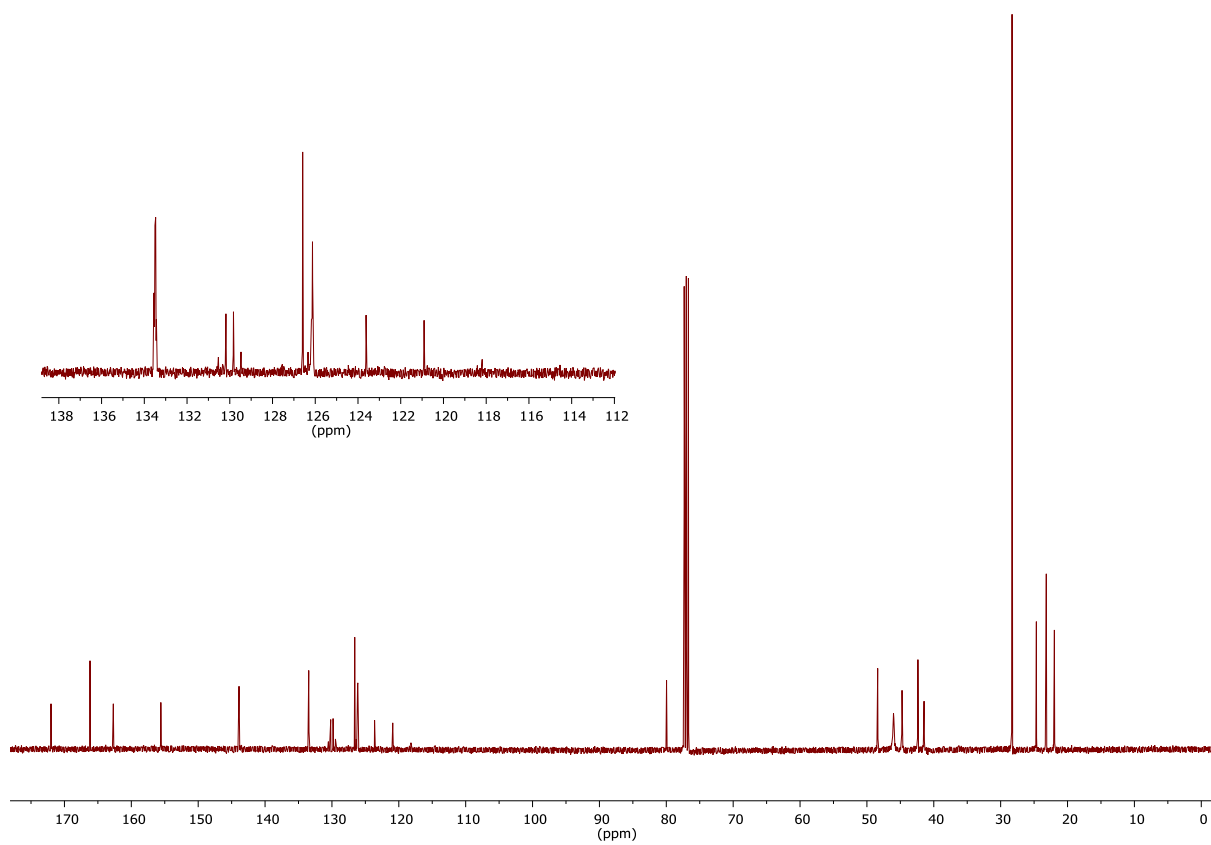

Figure S6B  $^{13}\text{C-NMR}$  (100 MHz) of **5c** in  $\text{CDCl}_3$ .

Sample Information

Sample Name :  
 Tray# : 1  
 Vial# : 24  
 Injection Volume : 5  
 Data File : AR160.lcd  
 Method File : MSP5-95\_30min\_1.0.lcm  
 Batch File : Batch170521\_2.lcb  
 Report Format File : Reportformat1.lsr  
 Date Acquired : 18.05.2021 01:02:29  
 Date Processed : 18.05.2021 01:32:31

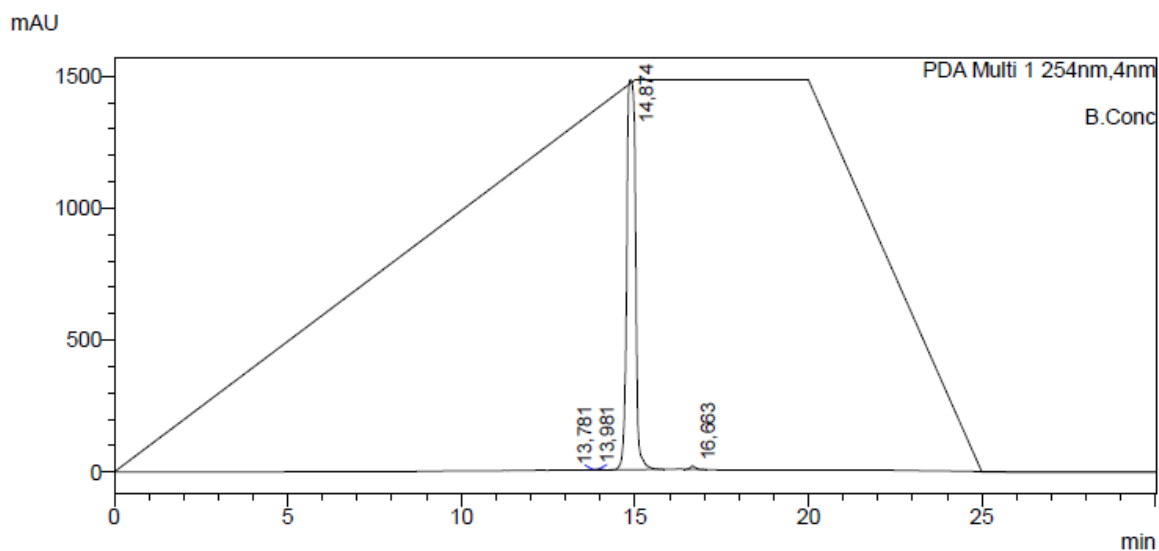

PDA Ch1 254nm

| Peak# | Ret. Time | Area     | Height  | Area%   |
|-------|-----------|----------|---------|---------|
| 1     | 13,781    | 36919    | 2031    | 0,141   |
| 2     | 13,981    | 43633    | 4145    | 0,167   |
| 3     | 14,874    | 25935138 | 1477303 | 99,212  |
| 4     | 16,663    | 125320   | 12864   | 0,479   |
| Total |           | 26141011 | 1496343 | 100,000 |

Figure S6C HPLC chromatogram of 5c.

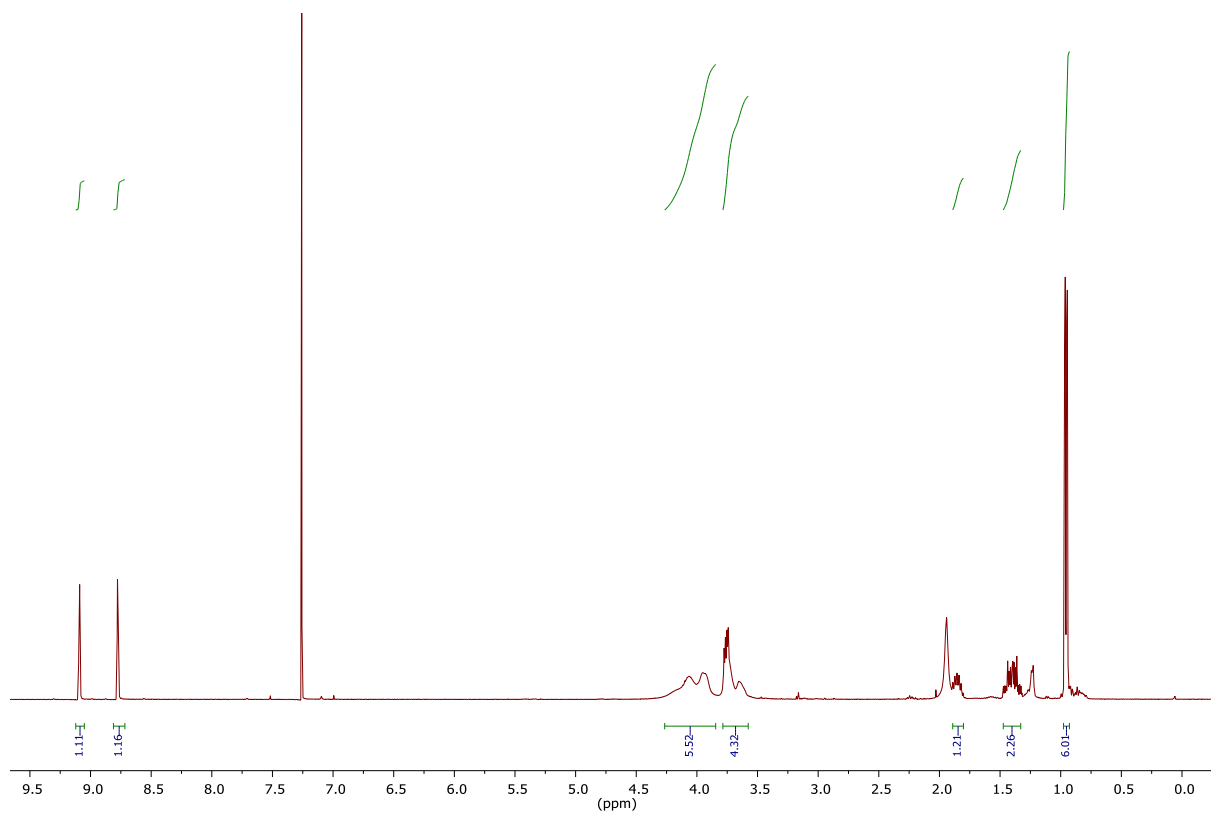

Figure S7A  $^1\text{H-NMR}$  (400 MHz) of **5d** in  $\text{CDCl}_3$ .

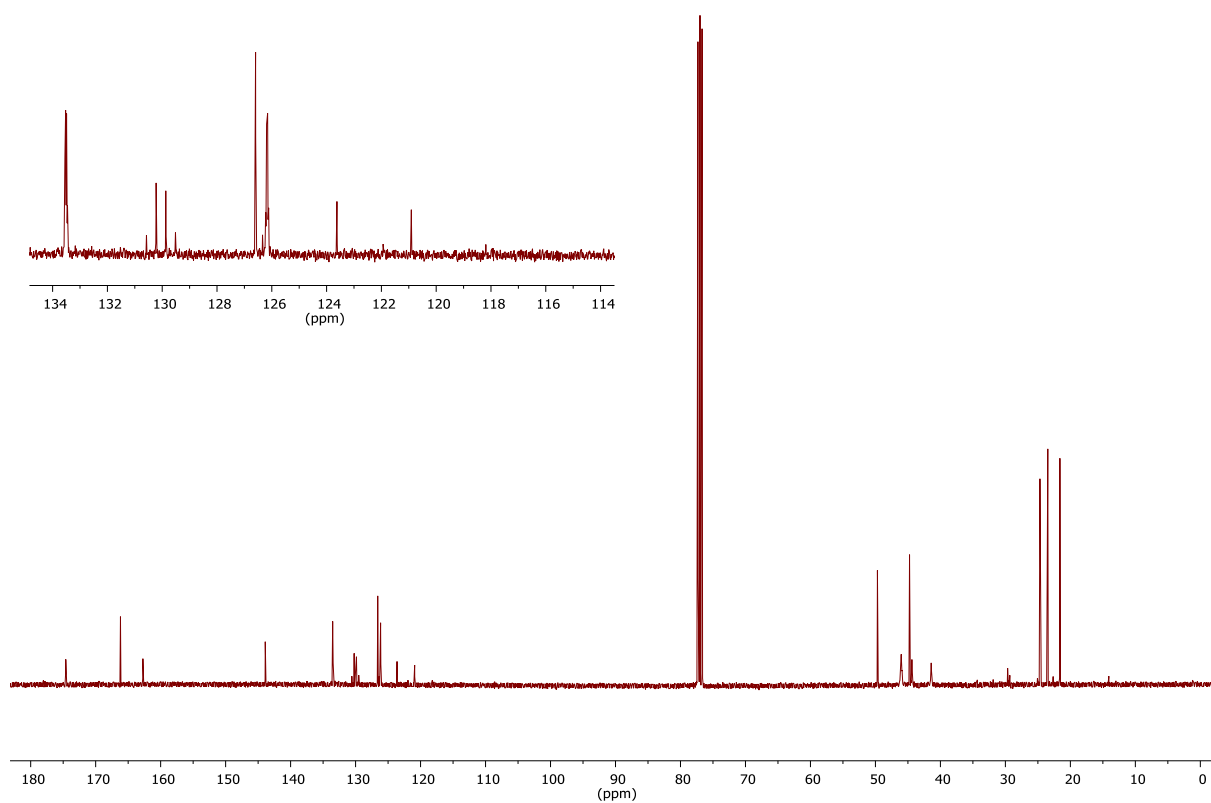

Figure S7B  $^{13}\text{C-NMR}$  (100 MHz) of **5d** in  $\text{CDCl}_3$ .



Sample Information

Sample Name :  
 Tray# : 0  
 Vial# : 2  
 Injection Volume : 20  
 Data File : AR 162.lcd  
 Method File : MSP5-95\_30min\_1.0.lcm  
 Batch File : Batch040621\_2.lcb  
 Report Format File : Reportformat1.lsr  
 Date Acquired : 04.06.2021 09:41:13  
 Date Processed : 04.06.2021 10:11:15

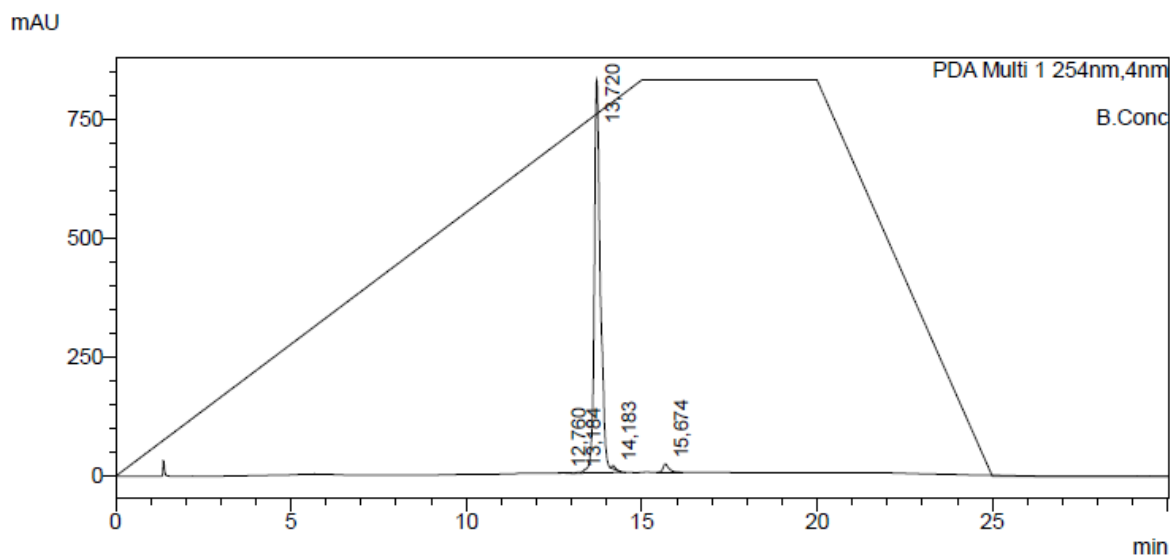

PDA Ch1 254nm

| Peak# | Ret. Time | Area     | Height | Area%   |
|-------|-----------|----------|--------|---------|
| 1     | 12,760    | 10534    | 1338   | 0,101   |
| 2     | 13,184    | 14190    | 1370   | 0,137   |
| 3     | 13,720    | 10111887 | 824970 | 97,351  |
| 4     | 14,183    | 42583    | 6579   | 0,410   |
| 5     | 15,674    | 207835   | 17635  | 2,001   |
| Total |           | 10387029 | 851892 | 100,000 |

Figure S7C HPLC chromatogram of **5d**.

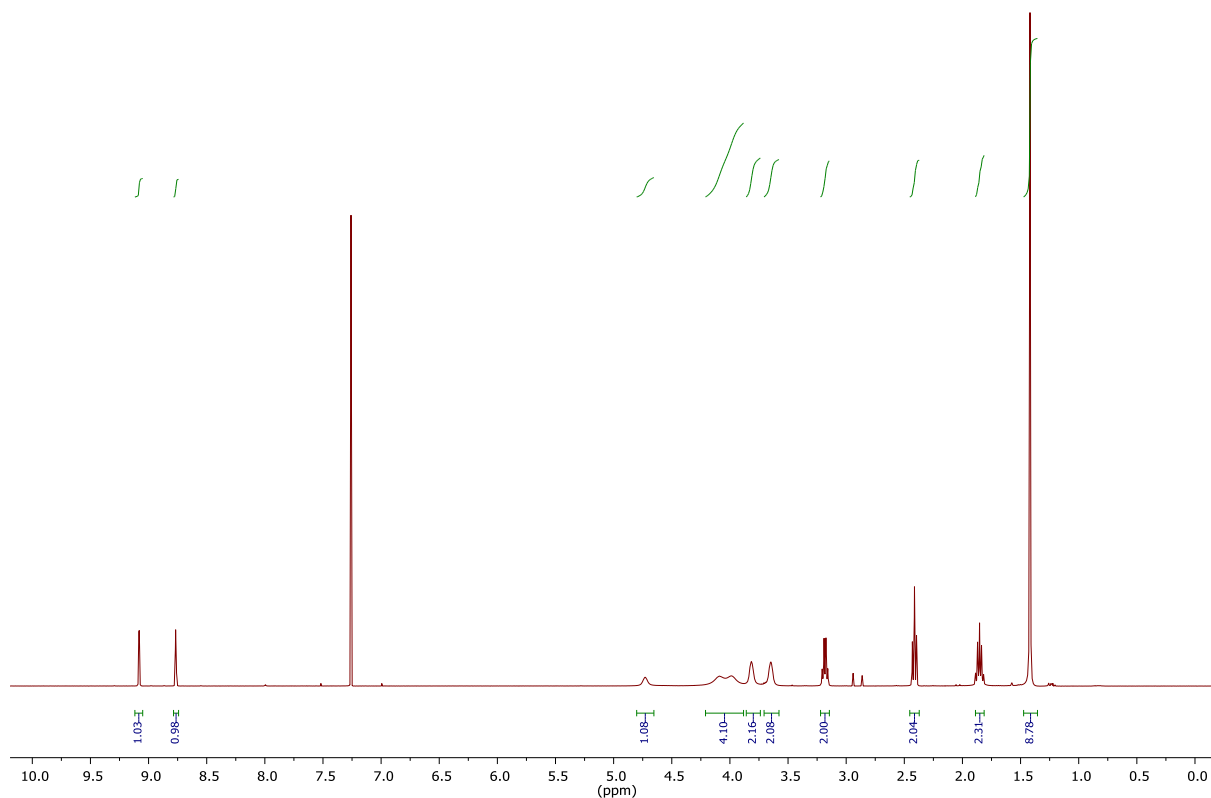

Figure S8A  $^1\text{H-NMR}$  (400 MHz) of **6d** in  $\text{CDCl}_3$ .

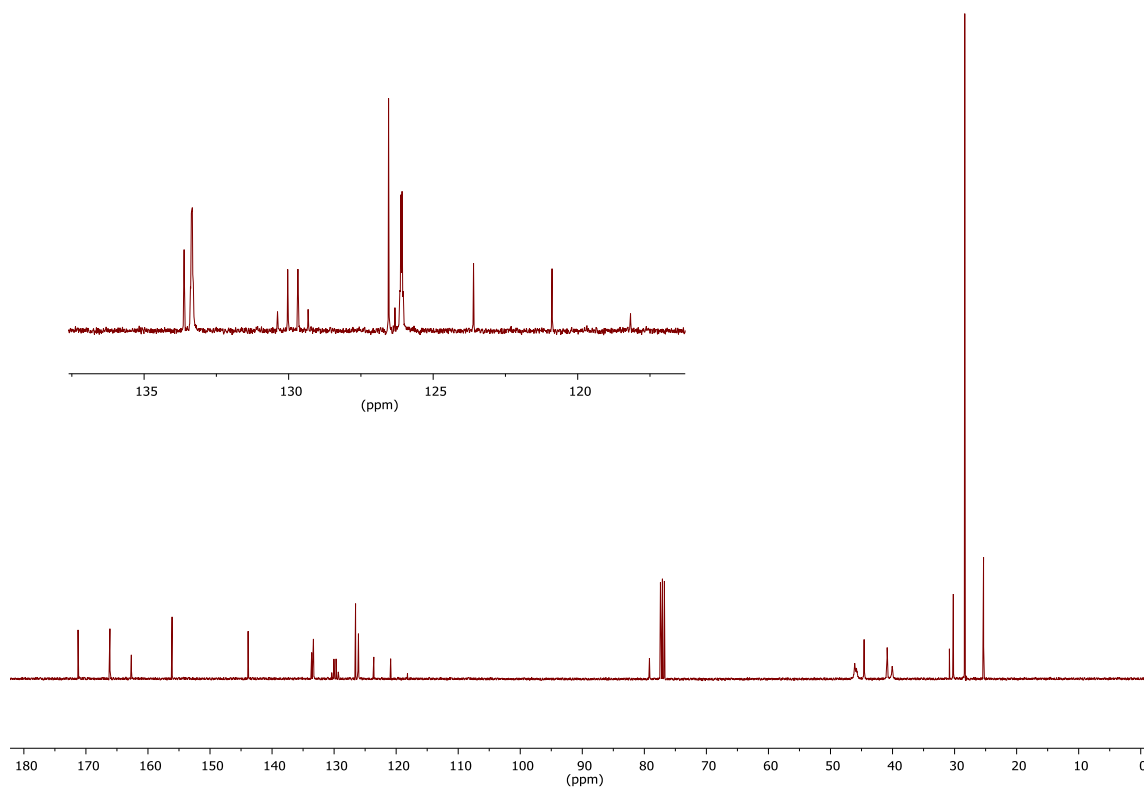

Figure S8B  $^{13}\text{C-NMR}$  (100 MHz) of **6d** in  $\text{CDCl}_3$ .

Sample Information

Sample Name :  
 Tray# : 1  
 Vial# : 16  
 Injection Volume : 5  
 Data File : AR164.lcd  
 Method File : MSP5-95\_30min\_1.0.lcm  
 Batch File : Batch170521\_2.lcb  
 Report Format File : Reportformat1.lsr  
 Date Acquired : 17.05.2021 20:58:20  
 Date Processed : 17.05.2021 21:28:22

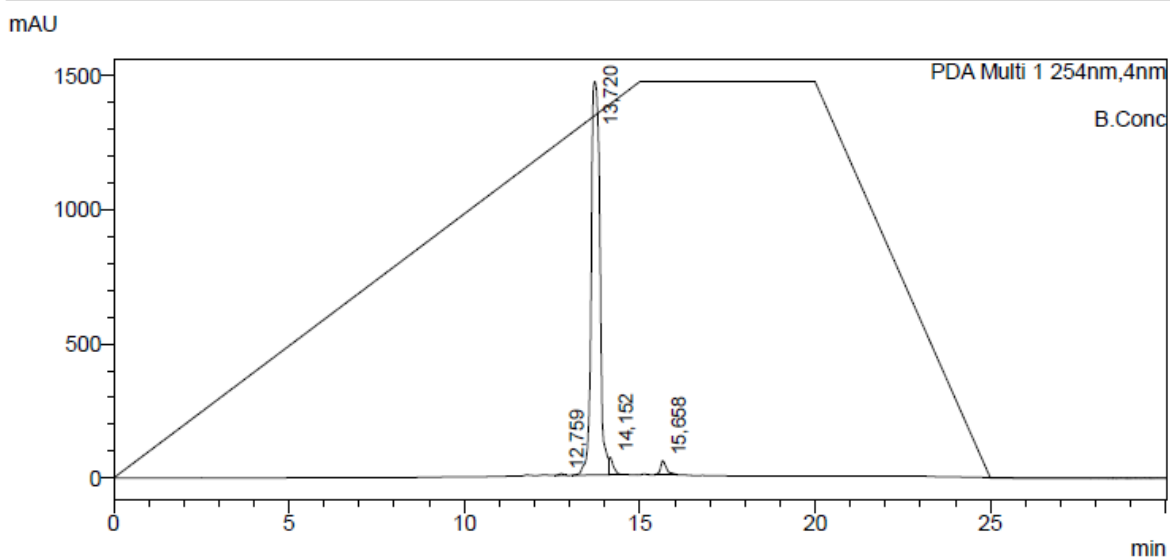

PDA Ch1 254nm

| Peak# | Ret. Time | Area     | Height  | Area%   |
|-------|-----------|----------|---------|---------|
| 1     | 12,759    | 38977    | 4984    | 0,148   |
| 2     | 13,720    | 25128998 | 1464975 | 95,420  |
| 3     | 14,152    | 562009   | 64280   | 2,134   |
| 4     | 15,658    | 605033   | 51639   | 2,297   |
| Total |           | 26335017 | 1585878 | 100,000 |

Figure S8C HPLC chromatogram of **6d**.

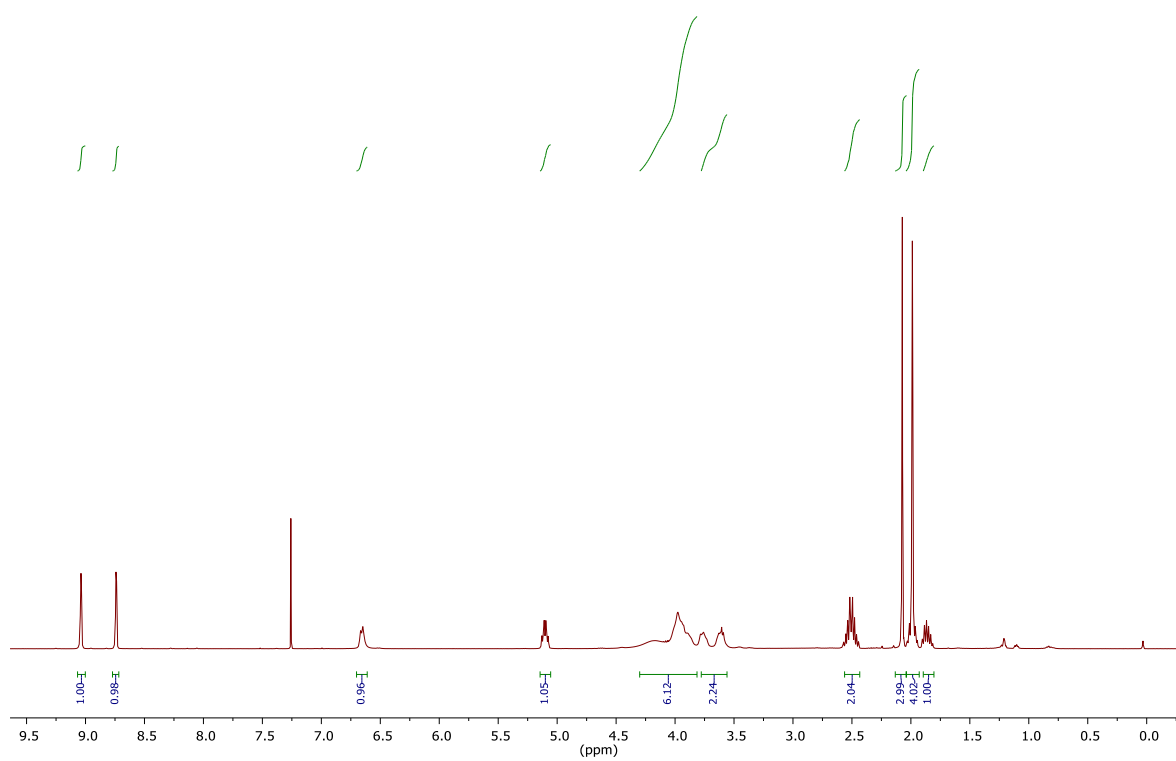

Figure S9A  $^1\text{H-NMR}$  (400 MHz) of **7c** in  $\text{CDCl}_3$ .

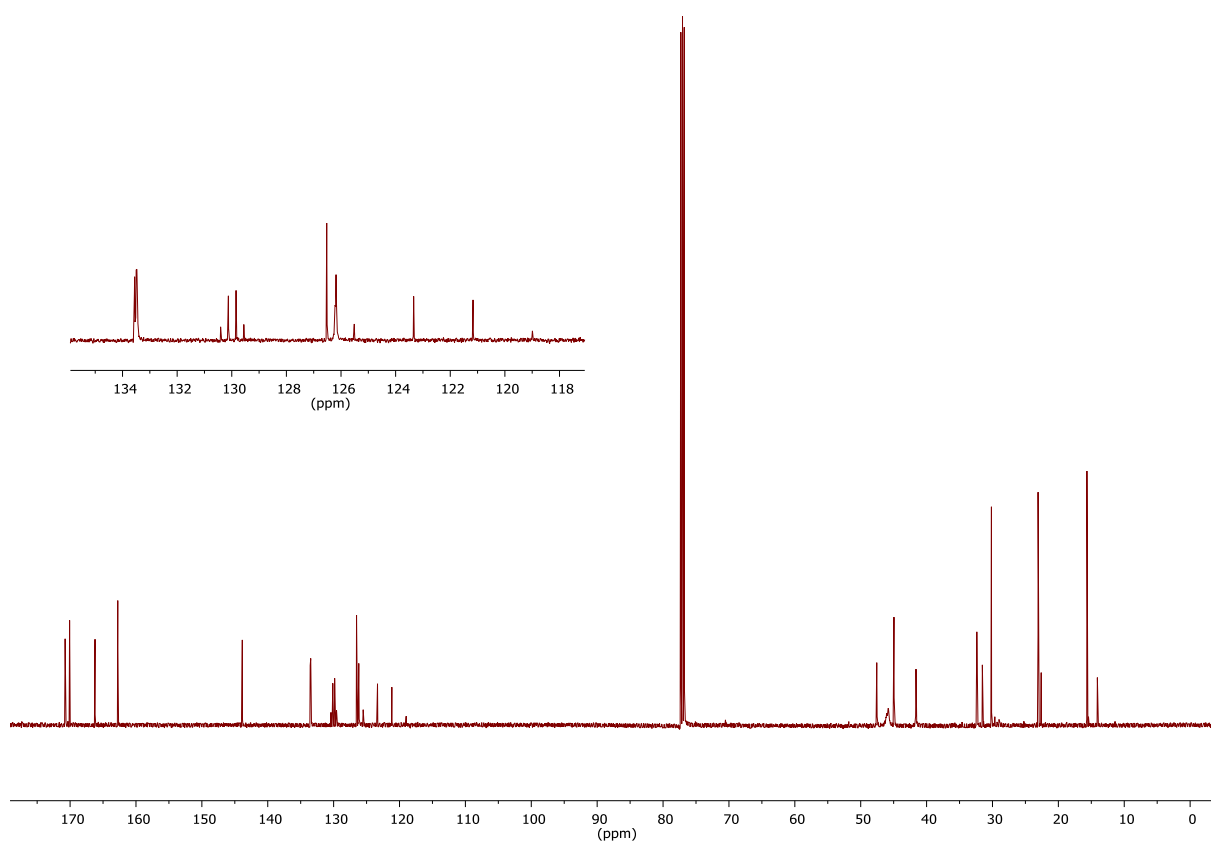

Figure S9B  $^{13}\text{C-NMR}$  (100 MHz) of **7c** in  $\text{CDCl}_3$ .

Sample Information

Sample Name :  
 Tray# : 0  
 Vial# : 3  
 Injection Volume : 20  
 Data File : AR 153\_040621.lcd  
 Method File : MSP5-95\_30min\_1.0.lcm  
 Batch File : Batch040621\_2.lcb  
 Report Format File : Reportformat1.lsr  
 Date Acquired : 04.06.2021 08:09:39  
 Date Processed : 04.06.2021 08:39:42

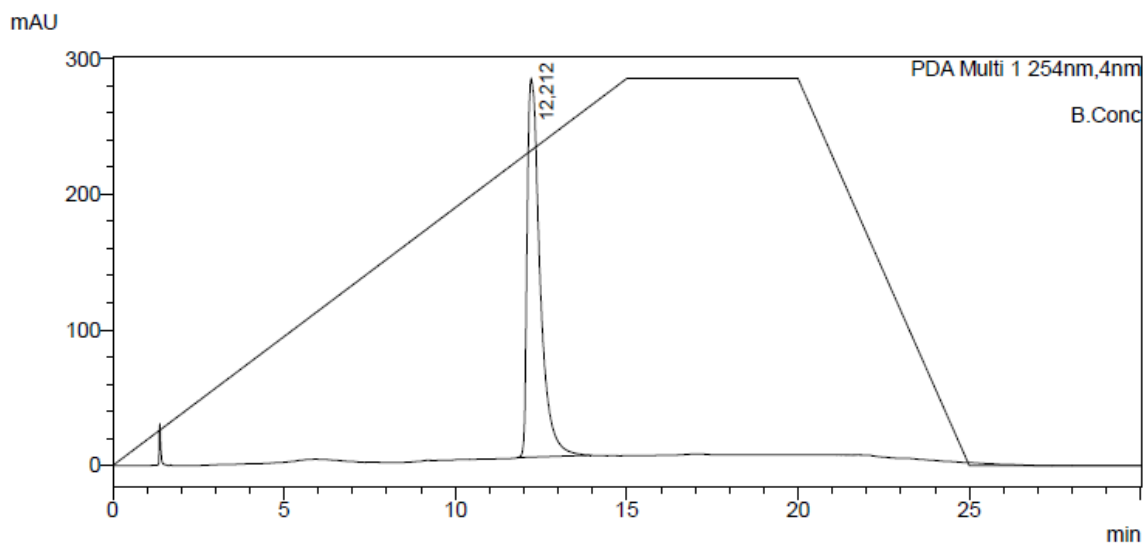

PDA Ch1 254nm

| Peak# | Ret. Time | Area    | Height | Area%   |
|-------|-----------|---------|--------|---------|
| 1     | 12,212    | 7298063 | 279211 | 100,000 |
| Total |           | 7298063 | 279211 | 100,000 |

Figure S9C HPLC chromatogram of **7c**.

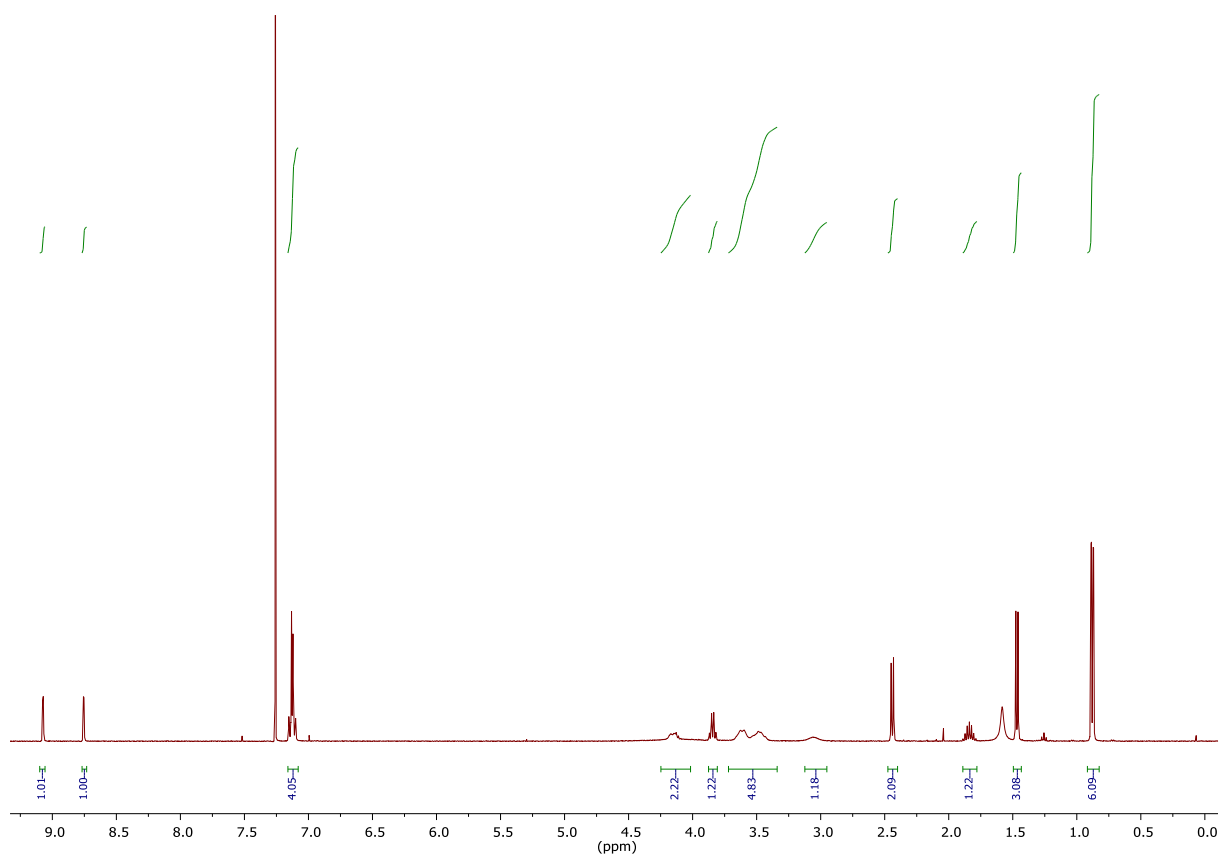

Figure S10A  $^1\text{H-NMR}$  (400 MHz) of **8c** in  $\text{CDCl}_3$ .

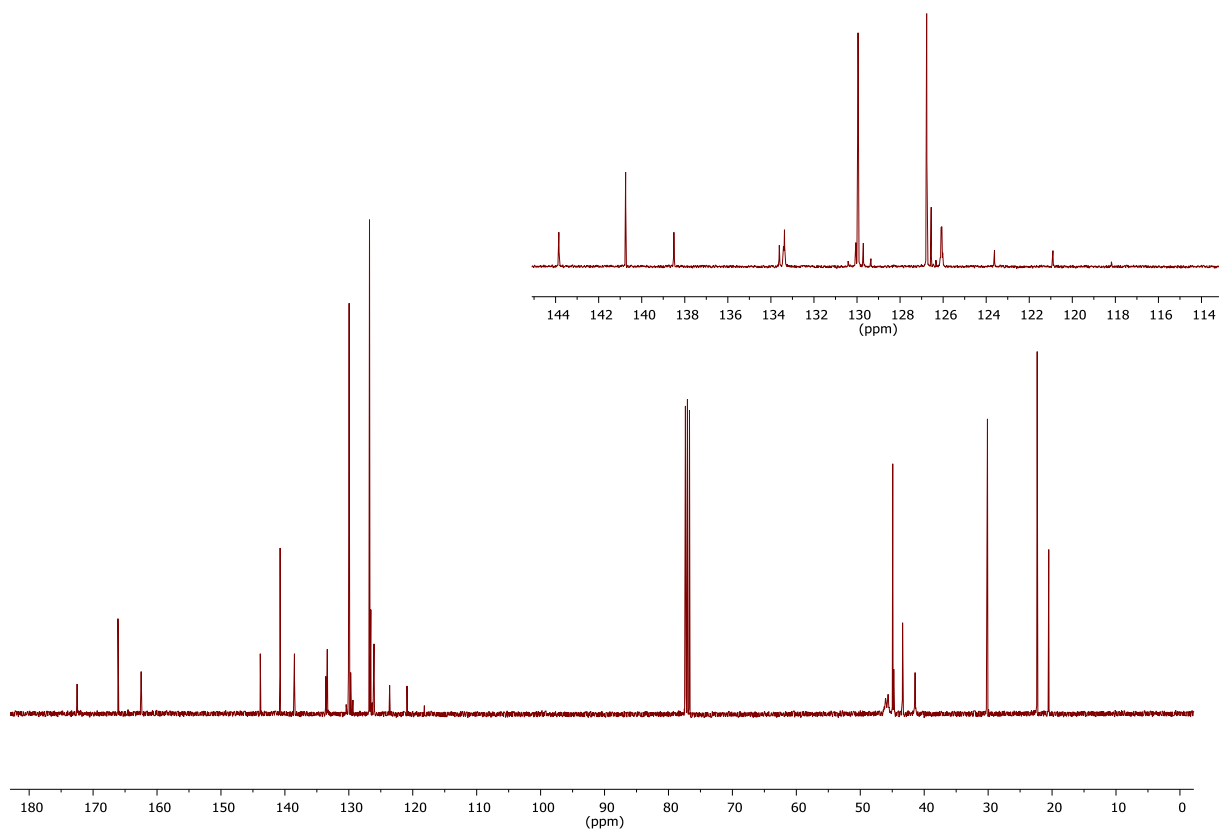

Figure S10B  $^{13}\text{C-NMR}$  (100 MHz) of **8c** in  $\text{CDCl}_3$ .

Sample Information

Sample Name :  
 Tray# : 1  
 Vial# : 25  
 Injection Volume : 5  
 Data File : AR168.lcd  
 Method File : MSP5-95\_30min\_1.0.lcm  
 Batch File : Batch170521\_2.lcb  
 Report Format File : Reportformat1.lsr  
 Date Acquired : 18.05.2021 01:33:00  
 Date Processed : 18.05.2021 02:03:03

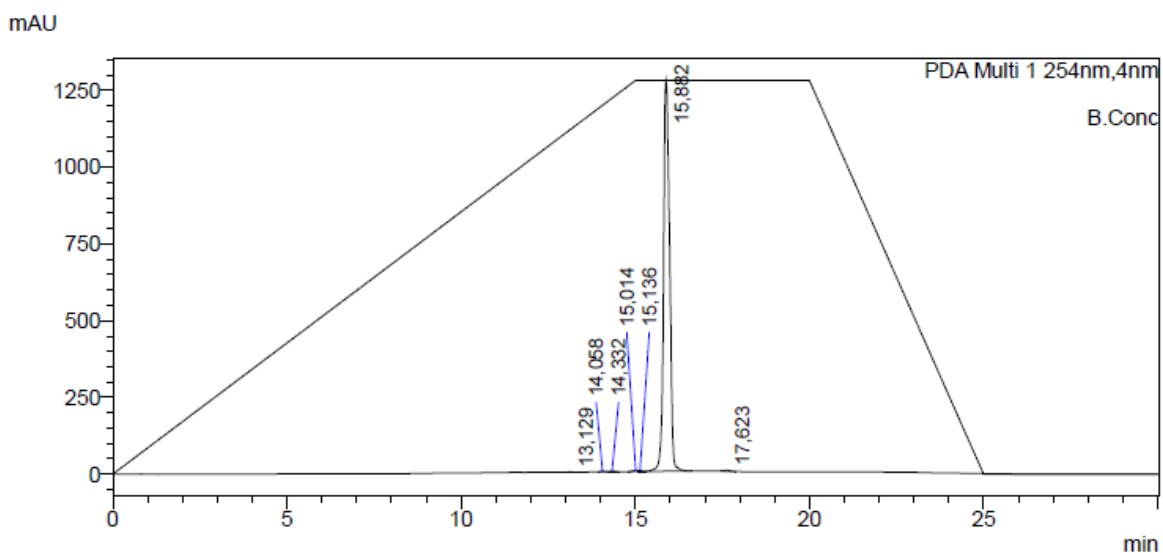

PDA Ch1 254nm

| Peak# | Ret. Time | Area     | Height  | Area%   |
|-------|-----------|----------|---------|---------|
| 1     | 13,129    | 18827    | 1659    | 0,121   |
| 2     | 14,058    | 24230    | 2337    | 0,156   |
| 3     | 14,332    | 24993    | 2384    | 0,161   |
| 4     | 15,014    | 37622    | 4012    | 0,243   |
| 5     | 15,136    | 27282    | 3355    | 0,176   |
| 6     | 15,882    | 15338115 | 1272360 | 98,922  |
| 7     | 17,623    | 34198    | 3576    | 0,221   |
| Total |           | 15505267 | 1289683 | 100,000 |

Figure S10C HPLC chromatogram of **8c**.

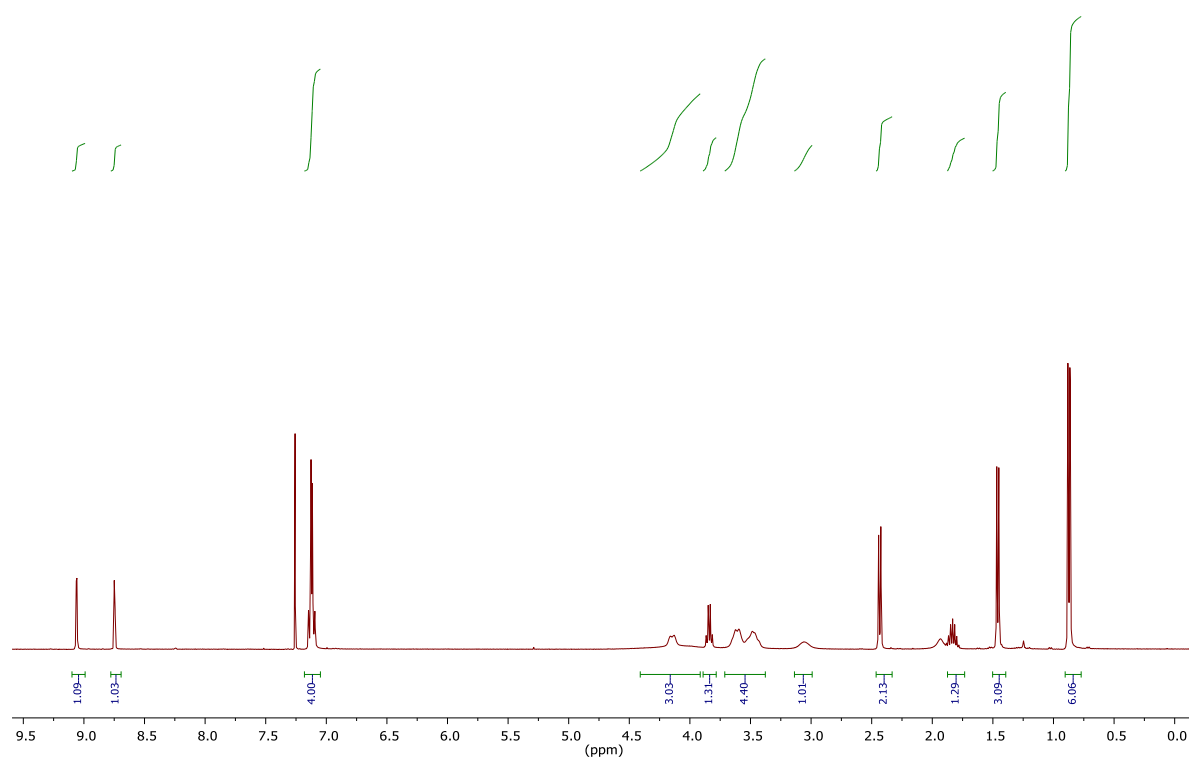

Figure S11A  $^1\text{H-NMR}$  (400 MHz) of **9a** in  $\text{CDCl}_3$ .

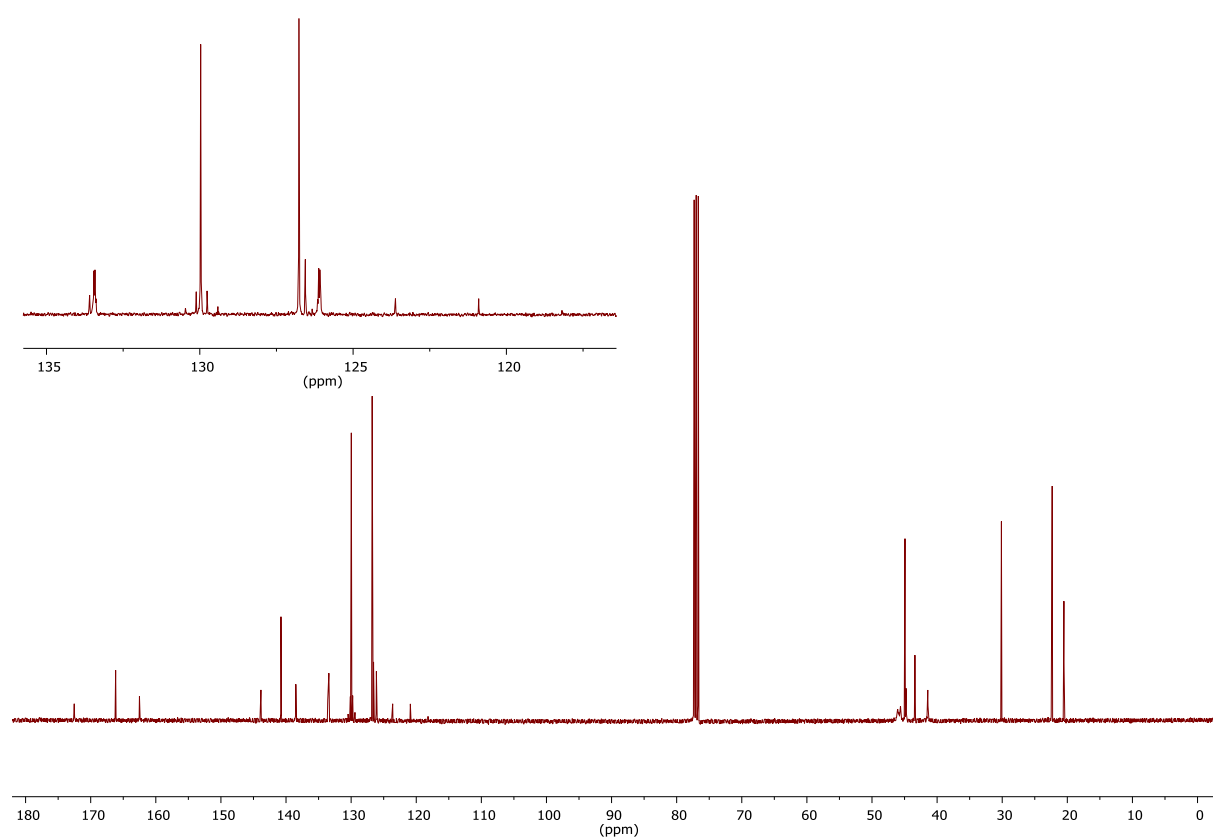

Figure S11B  $^{13}\text{C-NMR}$  (100 MHz) of **9a** in  $\text{CDCl}_3$ .



Sample Information

Sample Name :  
 Tray# : 1  
 Vial# : 26  
 Injection Volume : 5  
 Data File : AR212.lcd  
 Method File : MSP5-95\_30min\_1.0.lcm  
 Batch File : Batch170521\_2.lcb  
 Report Format File : Reportformat1.lsr  
 Date Acquired : 18.05.2021 02:03:33  
 Date Processed : 18.05.2021 02:33:36

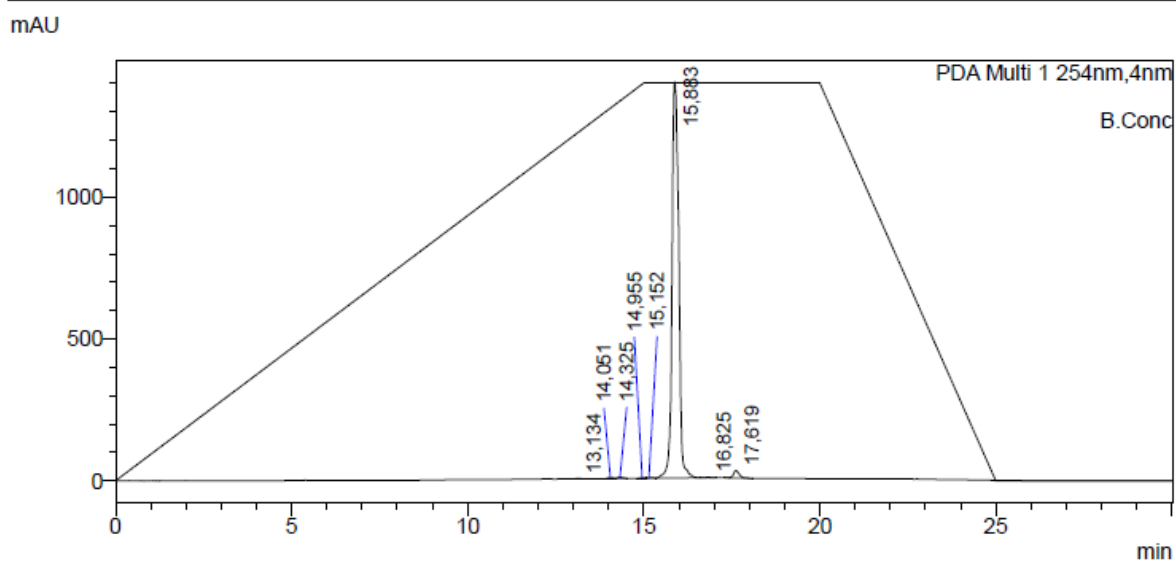

PDA Ch1 254nm

| Peak# | Ret. Time | Area     | Height  | Area%   |
|-------|-----------|----------|---------|---------|
| 1     | 13,134    | 27386    | 2550    | 0,144   |
| 2     | 14,051    | 45016    | 4063    | 0,236   |
| 3     | 14,325    | 53819    | 5441    | 0,282   |
| 4     | 14,955    | 21414    | 2035    | 0,112   |
| 5     | 15,152    | 30845    | 2878    | 0,162   |
| 6     | 15,883    | 18562379 | 1391444 | 97,402  |
| 7     | 16,825    | 21439    | 1538    | 0,112   |
| 8     | 17,619    | 295253   | 26573   | 1,549   |
| Total |           | 19057552 | 1436521 | 100,000 |

Figure S11C HPLC chromatogram of **9a**.

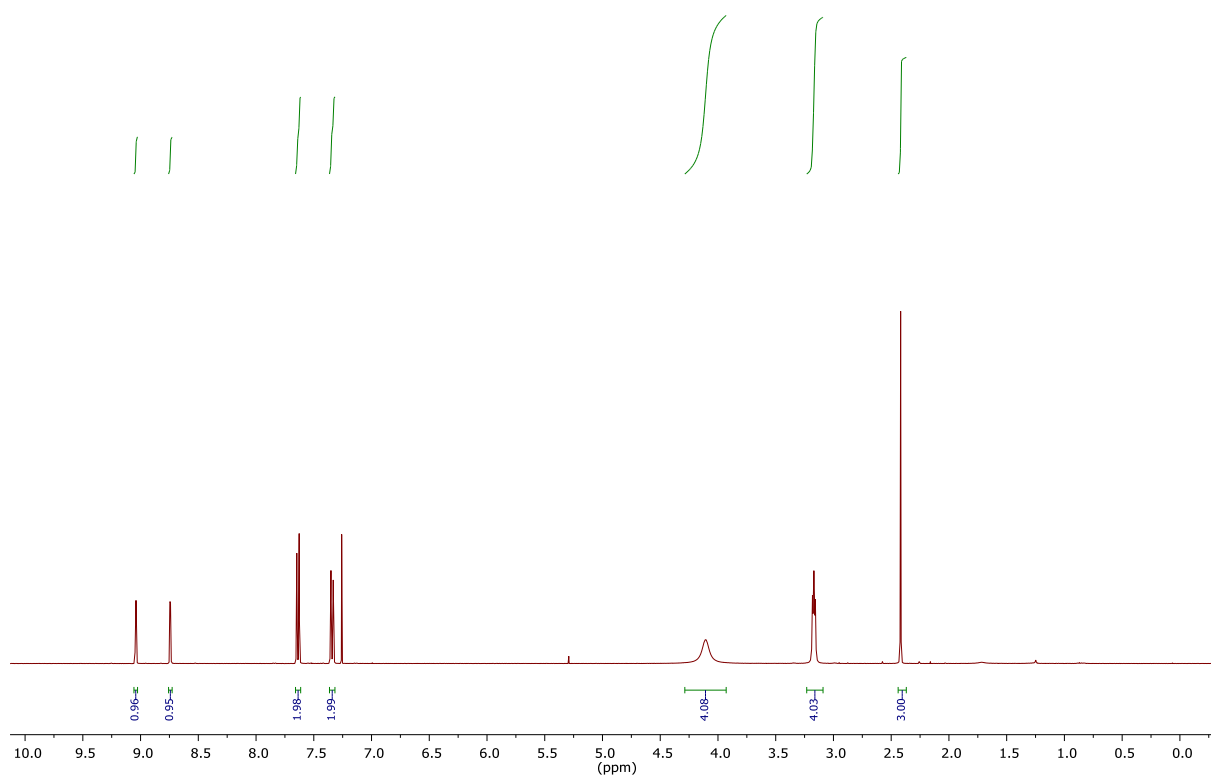

Figure S12A  $^1\text{H-NMR}$  (400 MHz) of **10c** in  $\text{CDCl}_3$ .

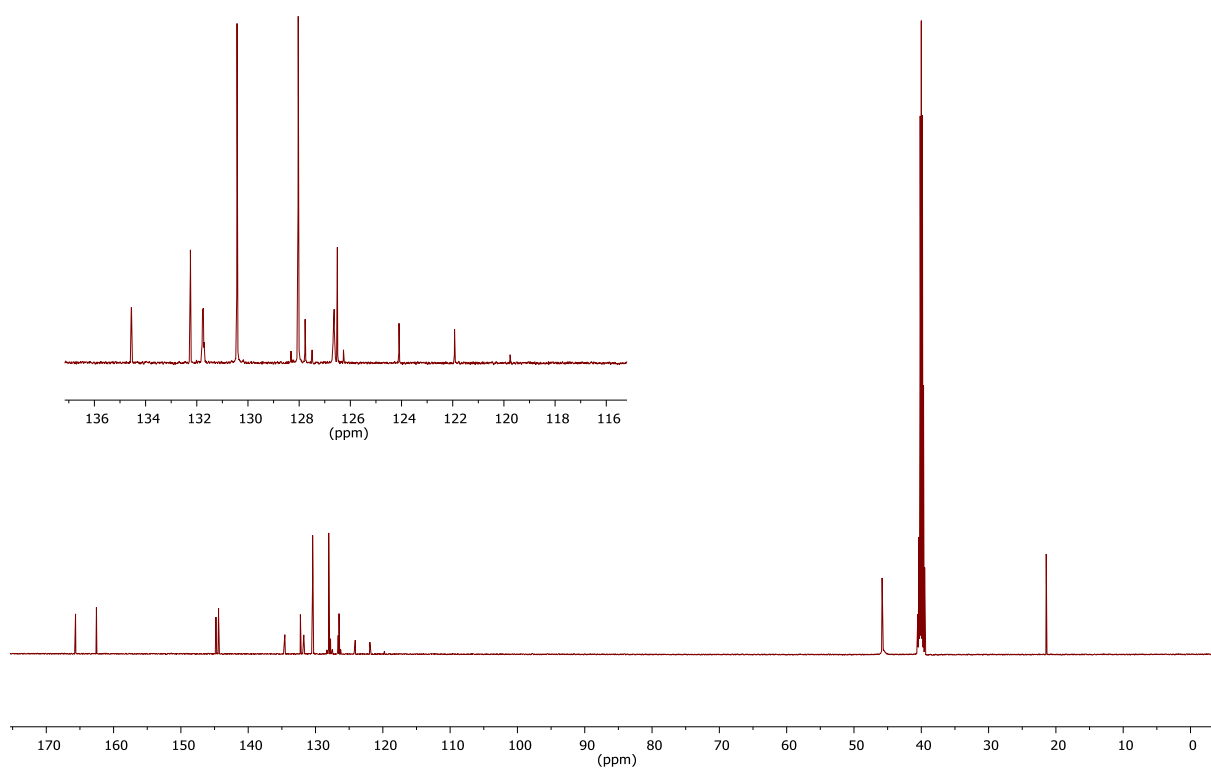

Figure S13B  $^{13}\text{C-NMR}$  (100 MHz) of **10c** in  $\text{DMSO-d}_6$ .

Sample Information

Sample Name :  
 Tray# : 0  
 Vial# : 8  
 Injection Volume : 10  
 Data File : AR172\_200521.lcd  
 Method File : MSP5-95\_30min\_1.0.lcm  
 Batch File : Batch190521\_1.lcb  
 Report Format File : Reportformat1.lsr  
 Date Acquired : 20.05.2021 23:01:05  
 Date Processed : 20.05.2021 23:31:07

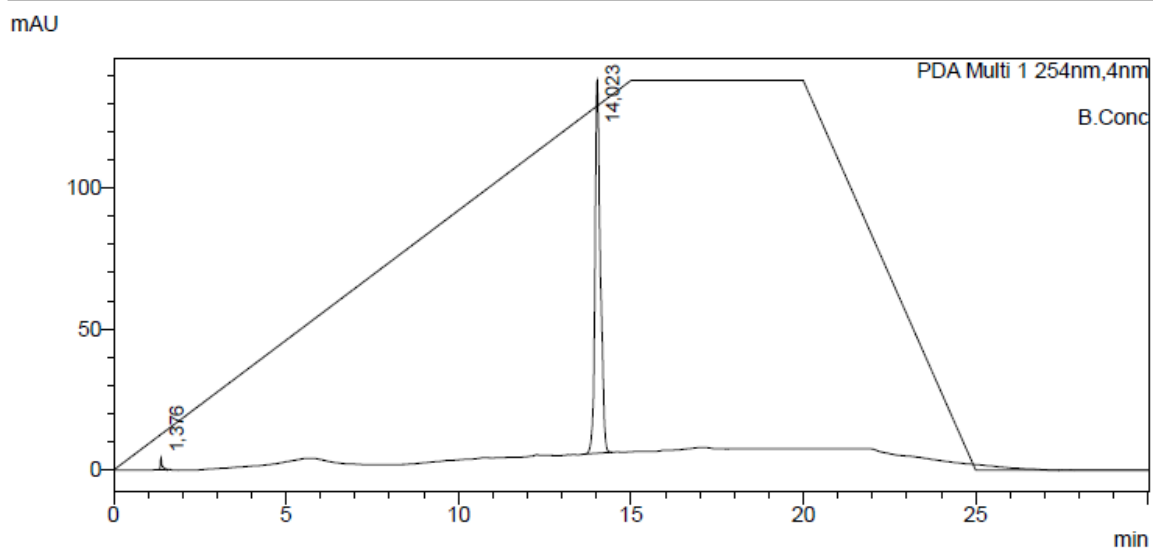

PDA Ch1 254nm

| Peak# | Ret. Time | Area    | Height | Area%   |
|-------|-----------|---------|--------|---------|
| 1     | 1,376     | 16338   | 4169   | 1,120   |
| 2     | 14,023    | 1442010 | 132279 | 98,880  |
| Total |           | 1458347 | 136448 | 100,000 |

Figure S12C HPLC chromatogram of **10c**.

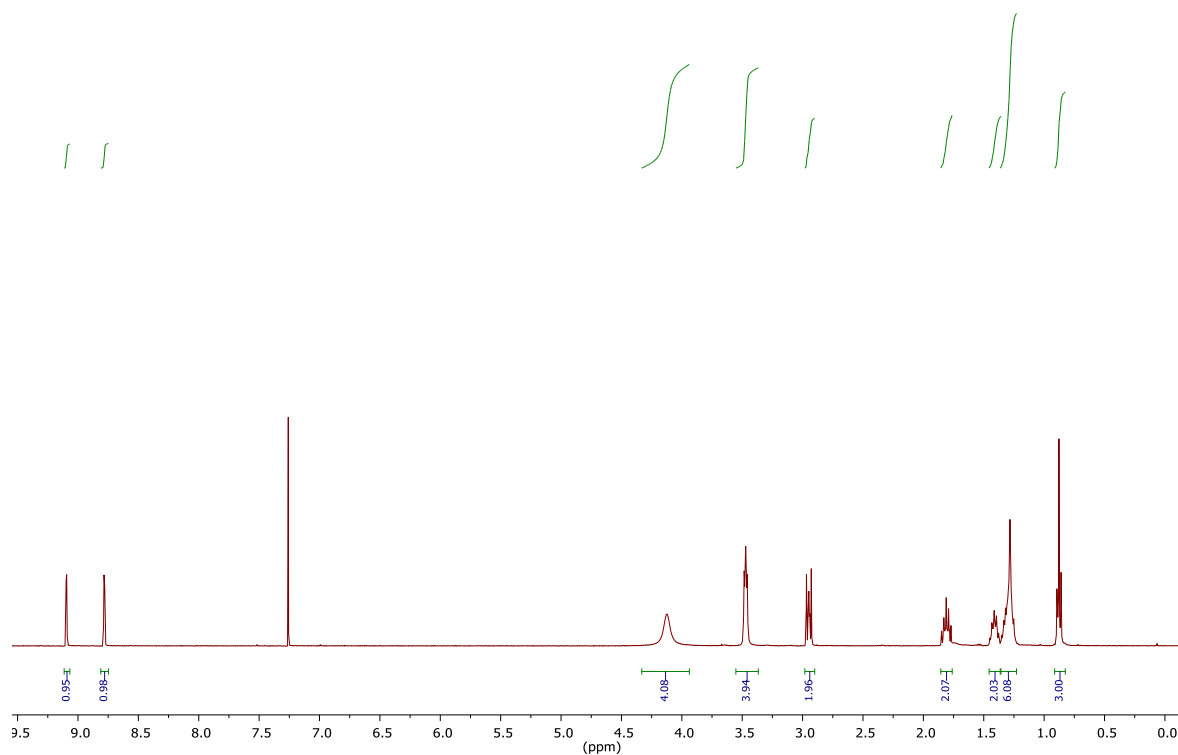

Figure S13A  $^1\text{H-NMR}$  (400 MHz) of **11c** in  $\text{CDCl}_3$ .

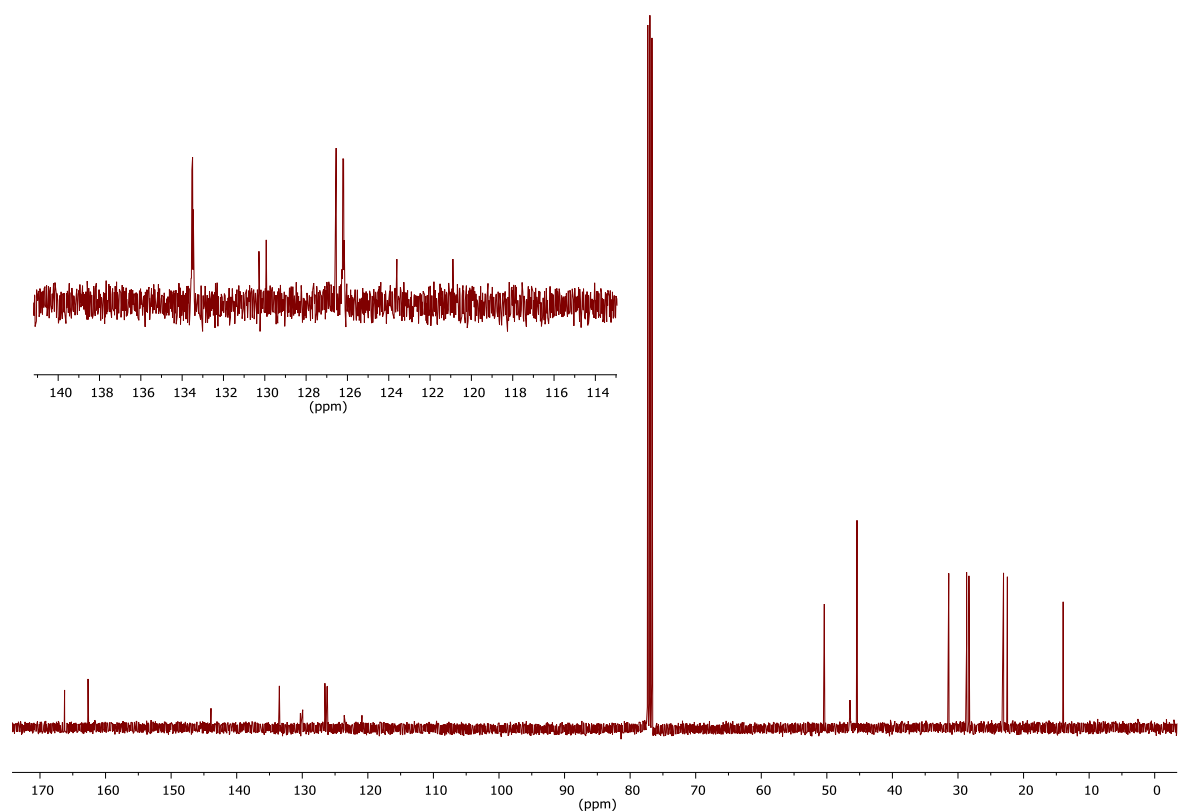

Figure S13B  $^{13}\text{C-NMR}$  (100 MHz) of **11c** in  $\text{CDCl}_3$ .

Sample Information

Sample Name :  
 Tray# : 1  
 Vial# : 13  
 Injection Volume : 5  
 Data File : AR175.lcd  
 Method File : MSP5-95\_30min\_1.0.lcm  
 Batch File : Batch170521\_2.lcb  
 Report Format File : Reportformat1.lsr  
 Date Acquired : 17.05.2021 19:26:45  
 Date Processed : 17.05.2021 19:56:47

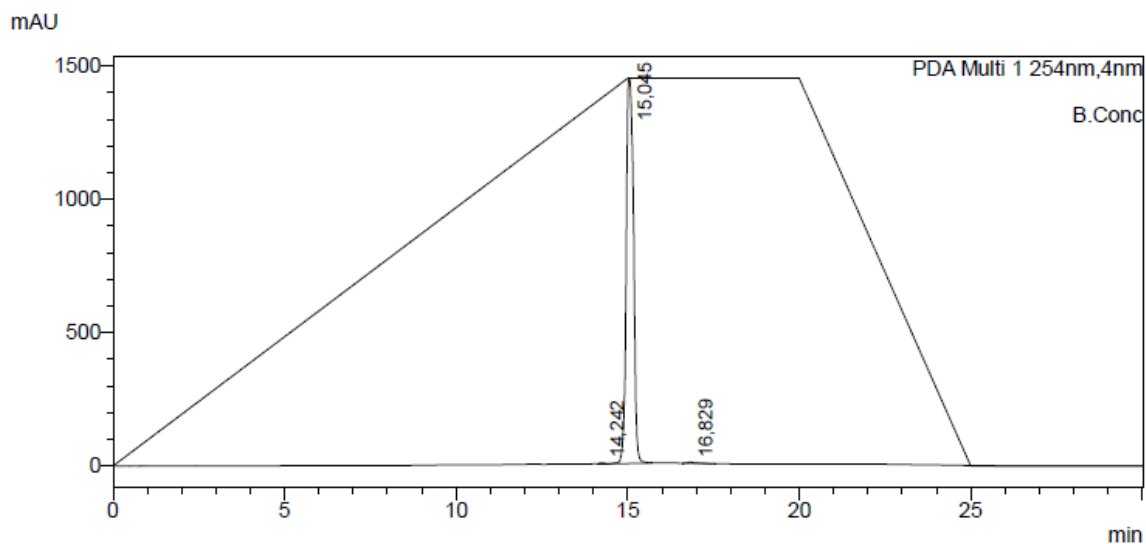

PDA Ch1 254nm

| Peak# | Ret. Time | Area     | Height  | Area%   |
|-------|-----------|----------|---------|---------|
| 1     | 14,242    | 39777    | 4002    | 0,186   |
| 2     | 15,045    | 21242103 | 1444526 | 99,493  |
| 3     | 16,829    | 68525    | 4440    | 0,321   |
| Total |           | 21350405 | 1452968 | 100,000 |

Figure S13C HPLC chromatogram of **11c**.

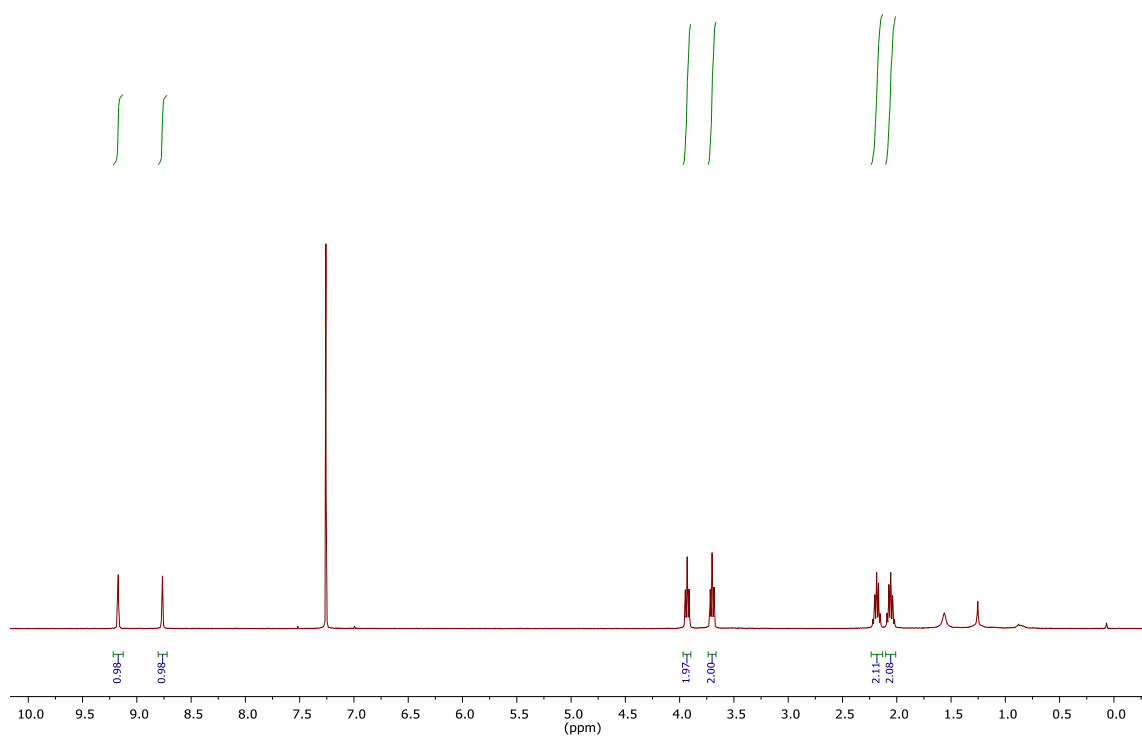

Figure S14A  $^1\text{H-NMR}$  (400 MHz) of **12b** in  $\text{CDCl}_3$ .

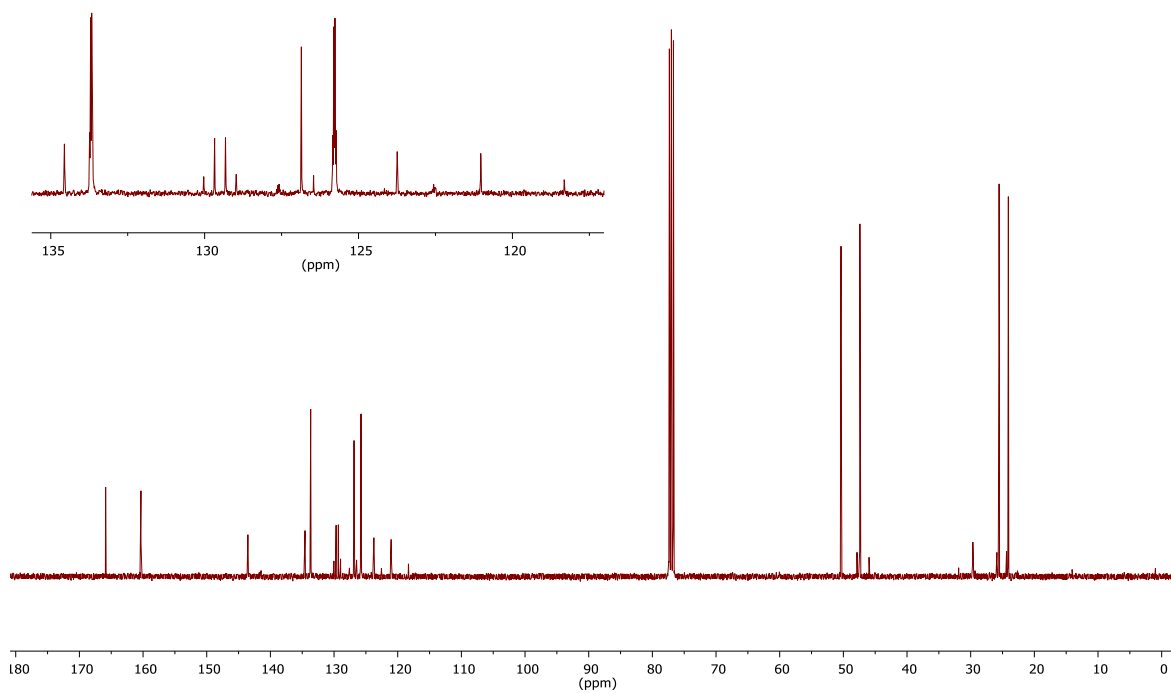

Figure S14B  $^{13}\text{C-NMR}$  (100 MHz) of **12b** in  $\text{CDCl}_3$ .

Sample Information

Sample Name :  
 Tray# : 0  
 Vial# : 9  
 Injection Volume : 20  
 Data File : IF265\_250521.lcd  
 Method File : MSP5-95\_30min\_1.0.lcm  
 Batch File : Batch250521\_1.lcb  
 Report Format File : Reportformat1.lsr  
 Date Acquired : 25.05.2021 17:41:22  
 Date Processed : 25.05.2021 18:11:24

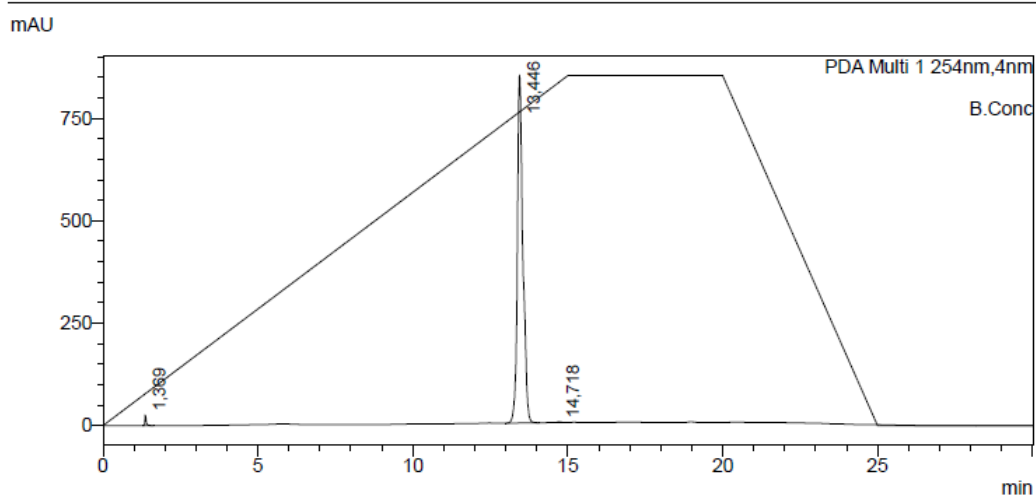

PDA Ch1 254nm

| Peak# | Ret. Time | Area     | Height | Area%   |
|-------|-----------|----------|--------|---------|
| 1     | 1,369     | 80183    | 24783  | 0,754   |
| 2     | 13,446    | 10535814 | 847120 | 99,129  |
| 3     | 14,718    | 12443    | 1375   | 0,117   |
| Total |           | 10628440 | 873277 | 100,000 |

Figure S14C HPLC chromatogram of **12b**.

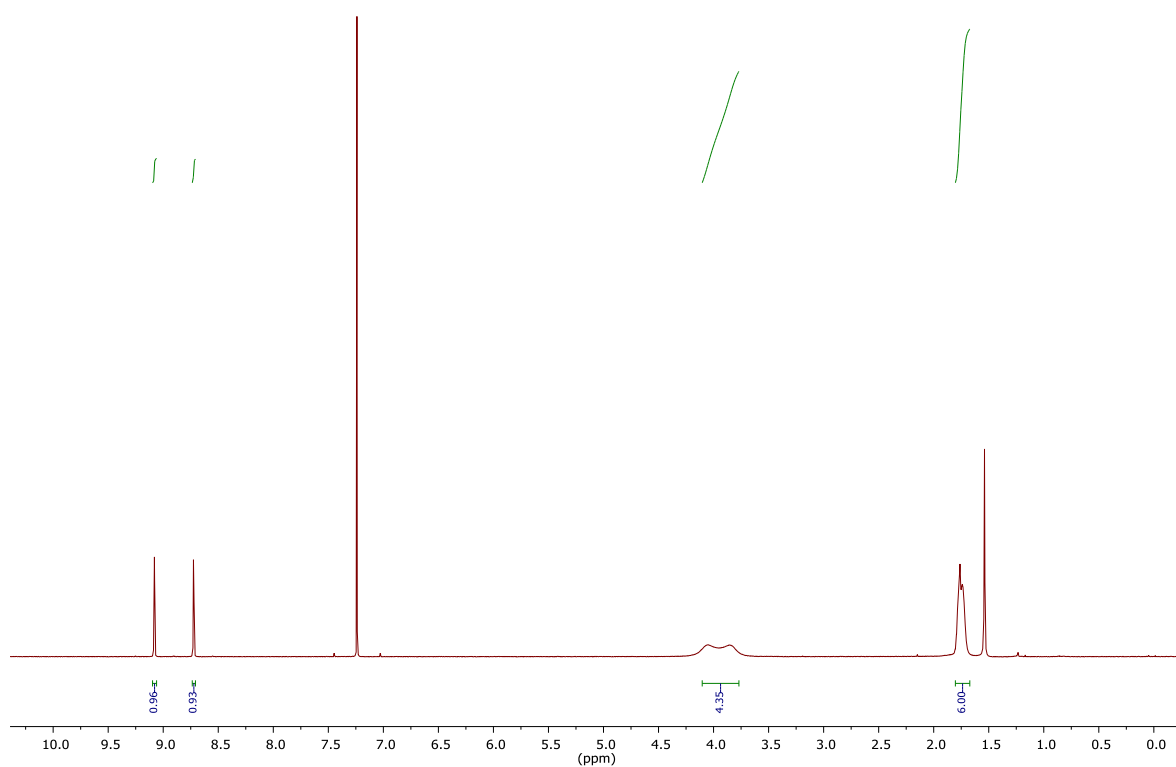

Figure S15A  $^1\text{H-NMR}$  (400 MHz) of **13b** in  $\text{CDCl}_3$ .

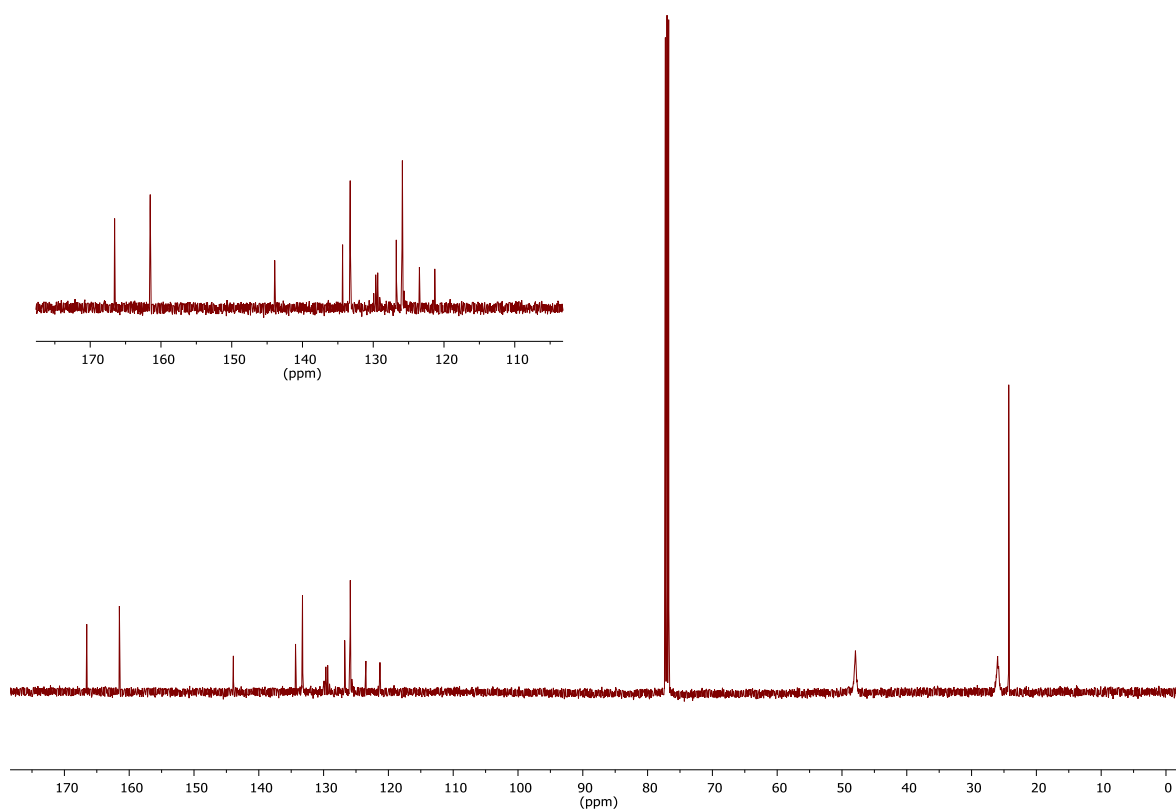

Figure S15B  $^{13}\text{C-NMR}$  (100 MHz) of **13b** in  $\text{CDCl}_3$ .



Sample Information

Sample Name :  
 Tray# : 0  
 Vial# : 2  
 Injection Volume : 5  
 Data File : AR187\_WDH.lcd  
 Method File : MSP5-95\_30min\_1.0.lcm  
 Batch File : Batch190521\_1.lcb  
 Report Format File : Reportformat1.lsr  
 Date Acquired : 20.05.2021 08:46:10  
 Date Processed : 20.05.2021 09:16:13

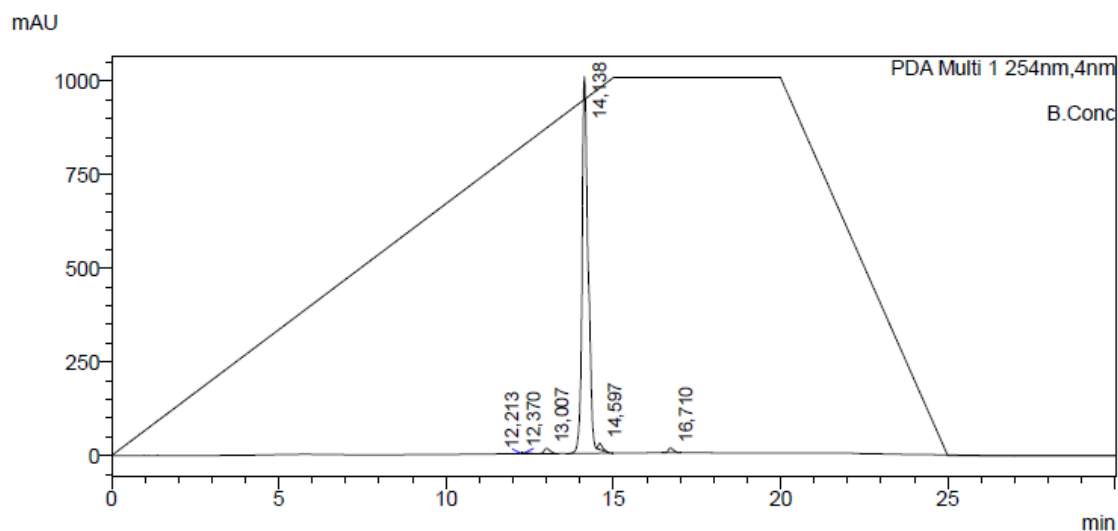

PDA Ch1 254nm

| Peak# | Ret. Time | Area     | Height  | Area%   |
|-------|-----------|----------|---------|---------|
| 1     | 12,213    | 19637    | 2290    | 0,147   |
| 2     | 12,370    | 45595    | 3613    | 0,341   |
| 3     | 13,007    | 169252   | 14284   | 1,265   |
| 4     | 14,138    | 12873608 | 1002787 | 96,201  |
| 5     | 14,597    | 139113   | 15998   | 1,040   |
| 6     | 16,710    | 134757   | 12511   | 1,007   |
| Total |           | 13381962 | 1051483 | 100,000 |

Figure S15C HPLC chromatogram of **13b**.

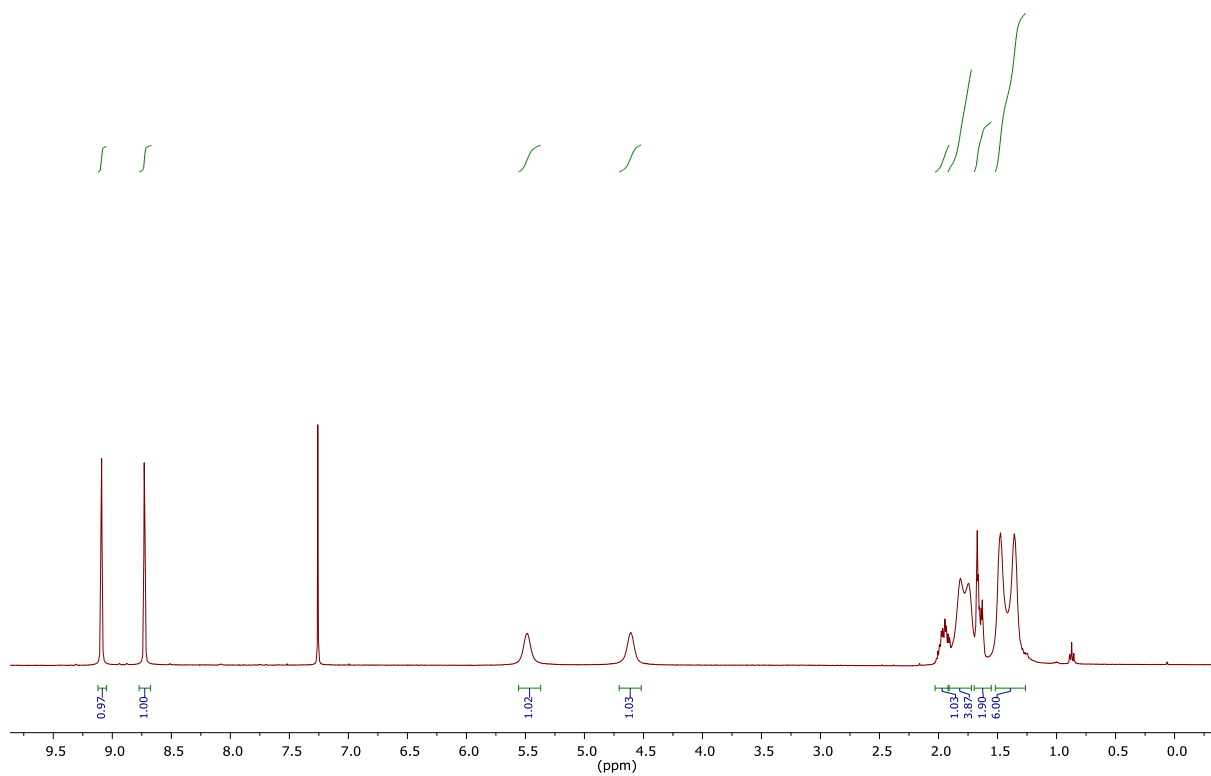

Figure S16A  $^1\text{H-NMR}$  (400 MHz) of **14a** in  $\text{CDCl}_3$ .

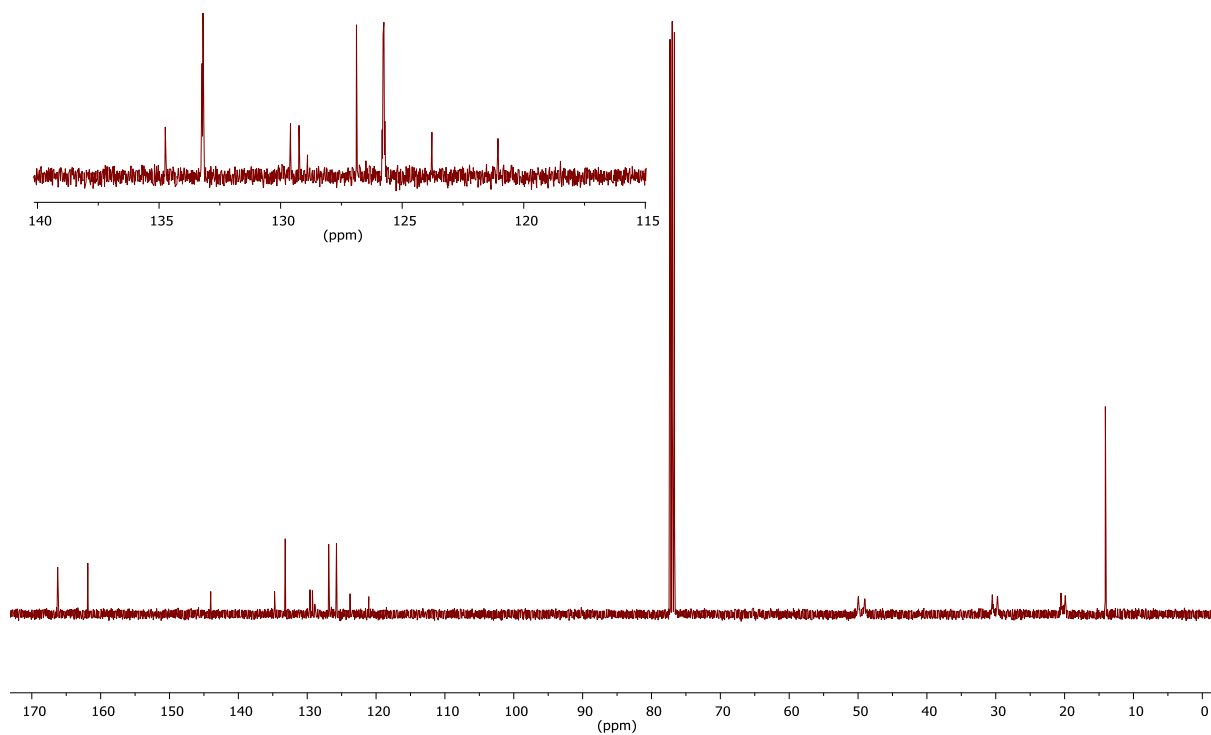

Figure S16B  $^{13}\text{C-NMR}$  (100 MHz) of **14a** in  $\text{CDCl}_3$ .

Sample Information

Sample Name :  
 Tray# : 1  
 Vial# : 23  
 Injection Volume : 5  
 Data File : AR120.lcd  
 Method File : MSP5-95\_30min\_1.0.lcm  
 Batch File : Batch170521\_2.lcb  
 Report Format File : Reportformat1.lsr  
 Date Acquired : 18.05.2021 00:31:57  
 Date Processed : 18.05.2021 01:02:00

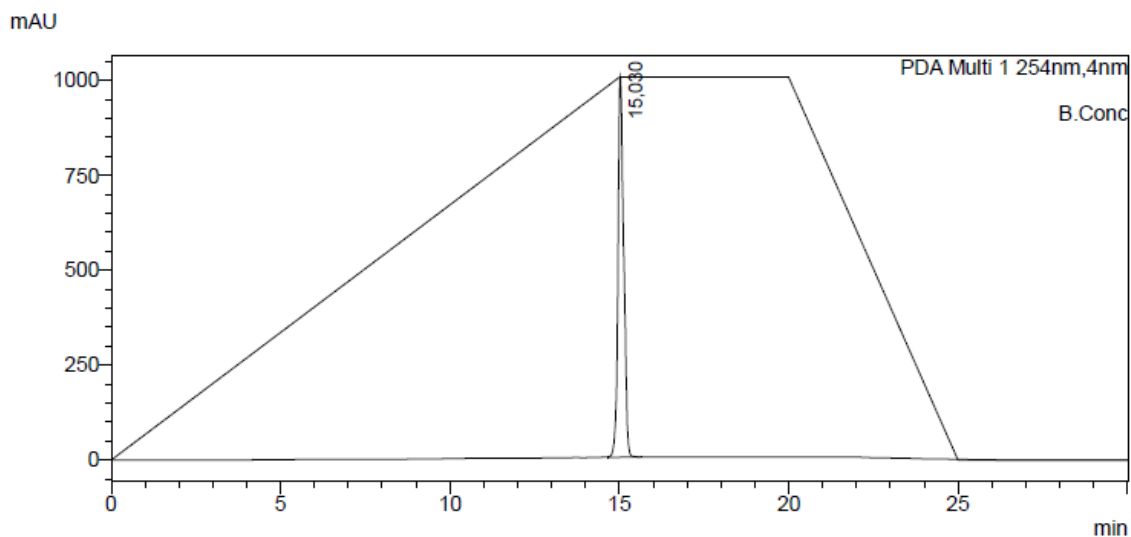

PDA Ch1 254nm

| Peak# | Ret. Time | Area     | Height  | Area%   |
|-------|-----------|----------|---------|---------|
| 1     | 15.030    | 11795376 | 1000470 | 100,000 |
| Total |           | 11795376 | 1000470 | 100,000 |

Figure S16C HPLC chromatogram of **14a**.

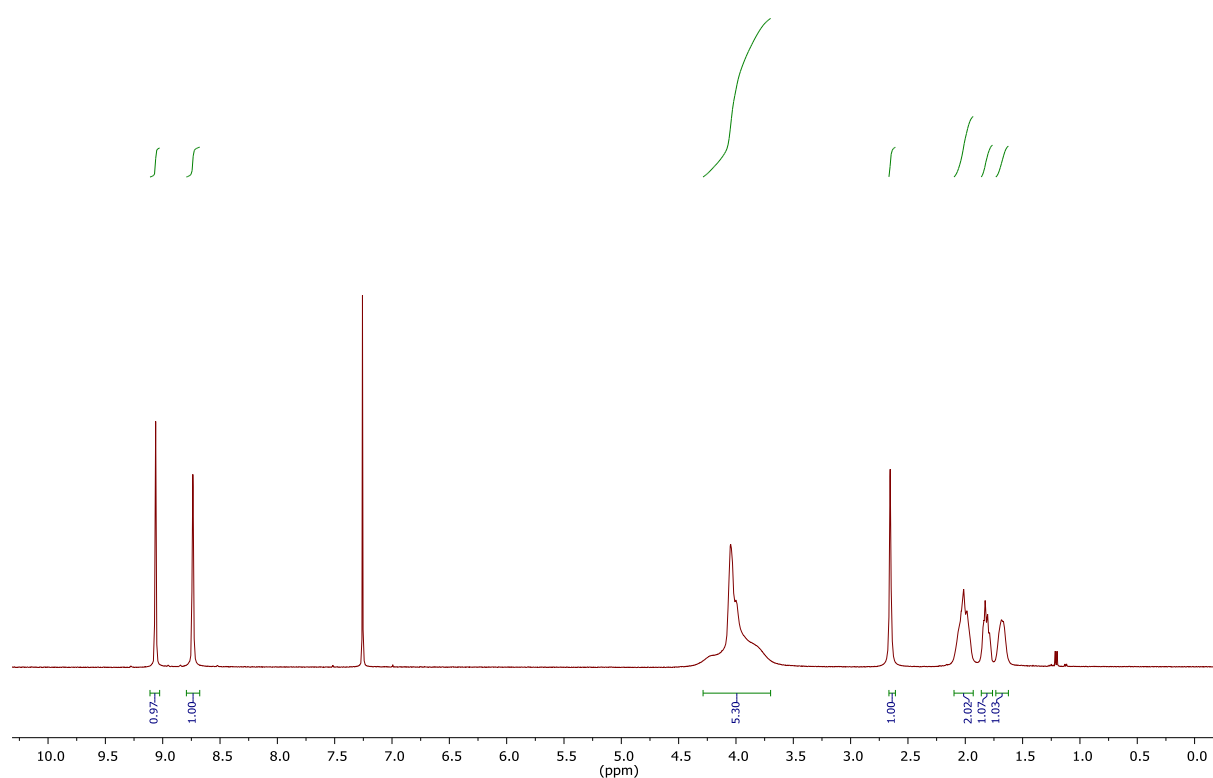

Figure S17A  $^1\text{H-NMR}$  (400 MHz) of **15b** in  $\text{CDCl}_3$ .

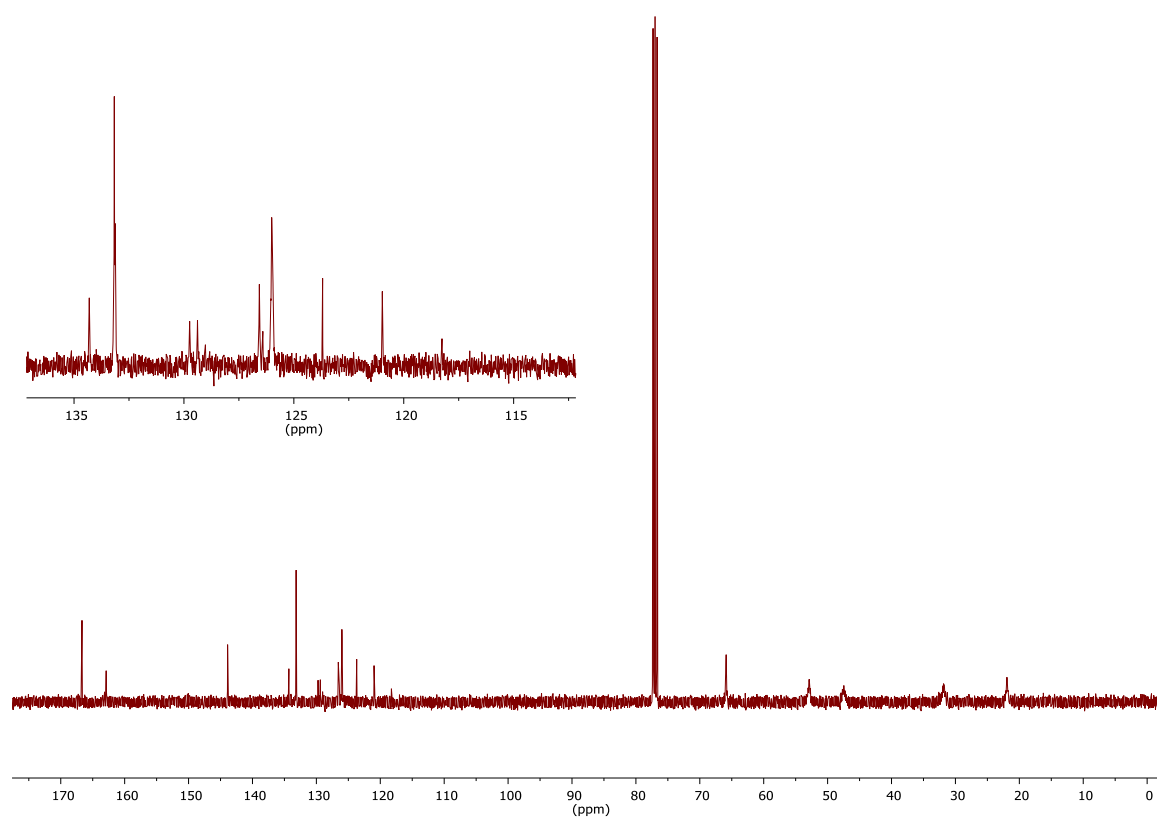

Figure S17B  $^{13}\text{C-NMR}$  (100 MHz) of **15b** in  $\text{CDCl}_3$ .

Sample Information

Sample Name :  
 Tray# : 1  
 Vial# : 6  
 Injection Volume : 5  
 Data File : AR110.lcd  
 Method File : MSP5-95\_30min\_1.0.lcm  
 Batch File : Batch170521\_2.lcb  
 Report Format File : Reportformat1.lsr  
 Date Acquired : 17.05.2021 15:53:00  
 Date Processed : 17.05.2021 16:23:02

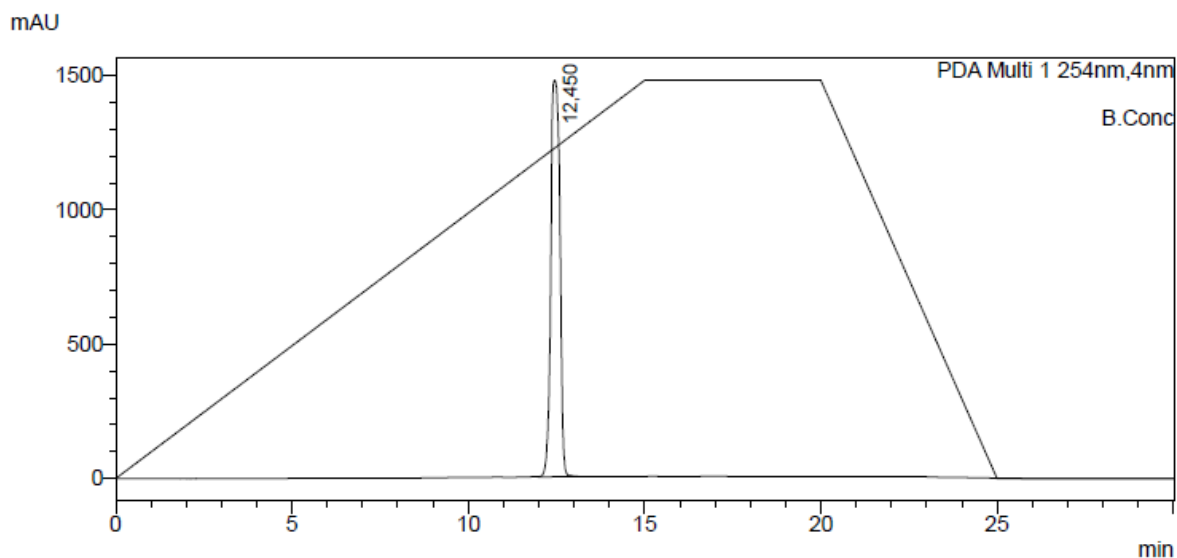

PDA Ch1 254nm

| Peak# | Ret. Time | Area     | Height  | Area%   |
|-------|-----------|----------|---------|---------|
| 1     | 12,450    | 26349511 | 1475139 | 100,000 |
| Total |           | 26349511 | 1475139 | 100,000 |

Figure S17C HPLC chromatogram of **15b**.

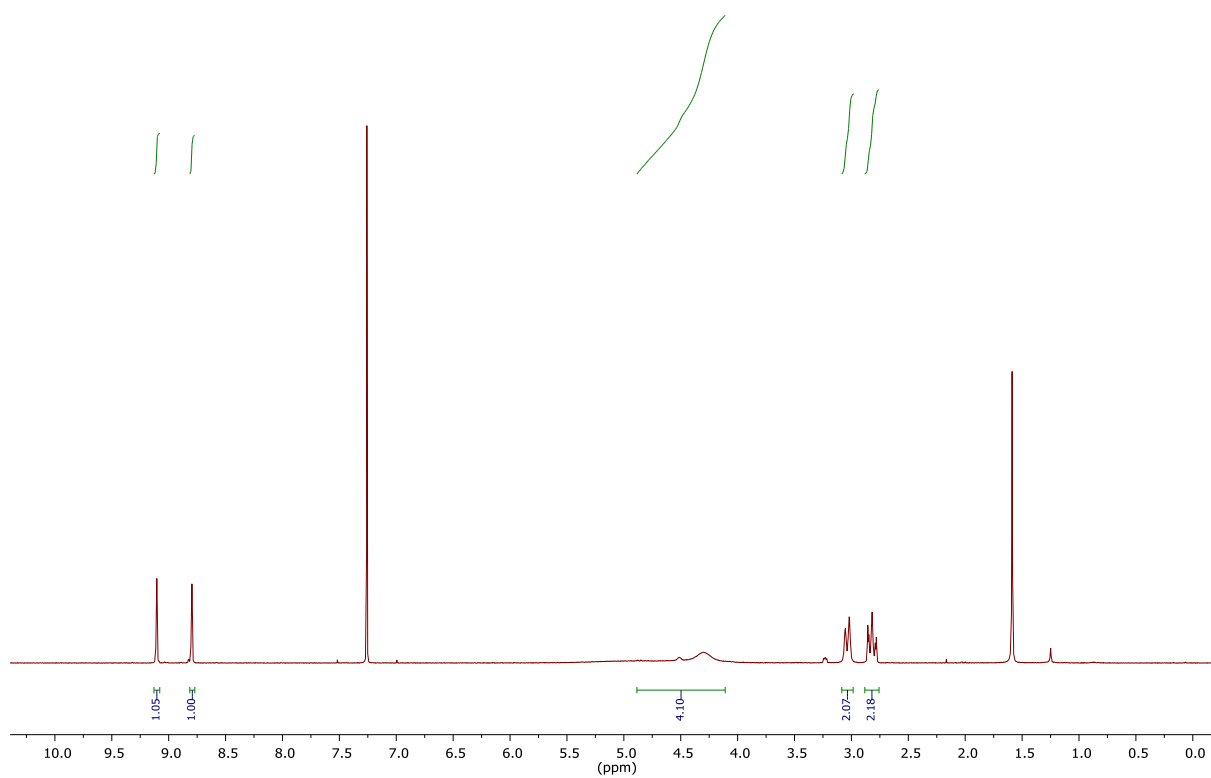

Figure S18A  $^1\text{H-NMR}$  (400 MHz) of **16c** in  $\text{CDCl}_3$ .

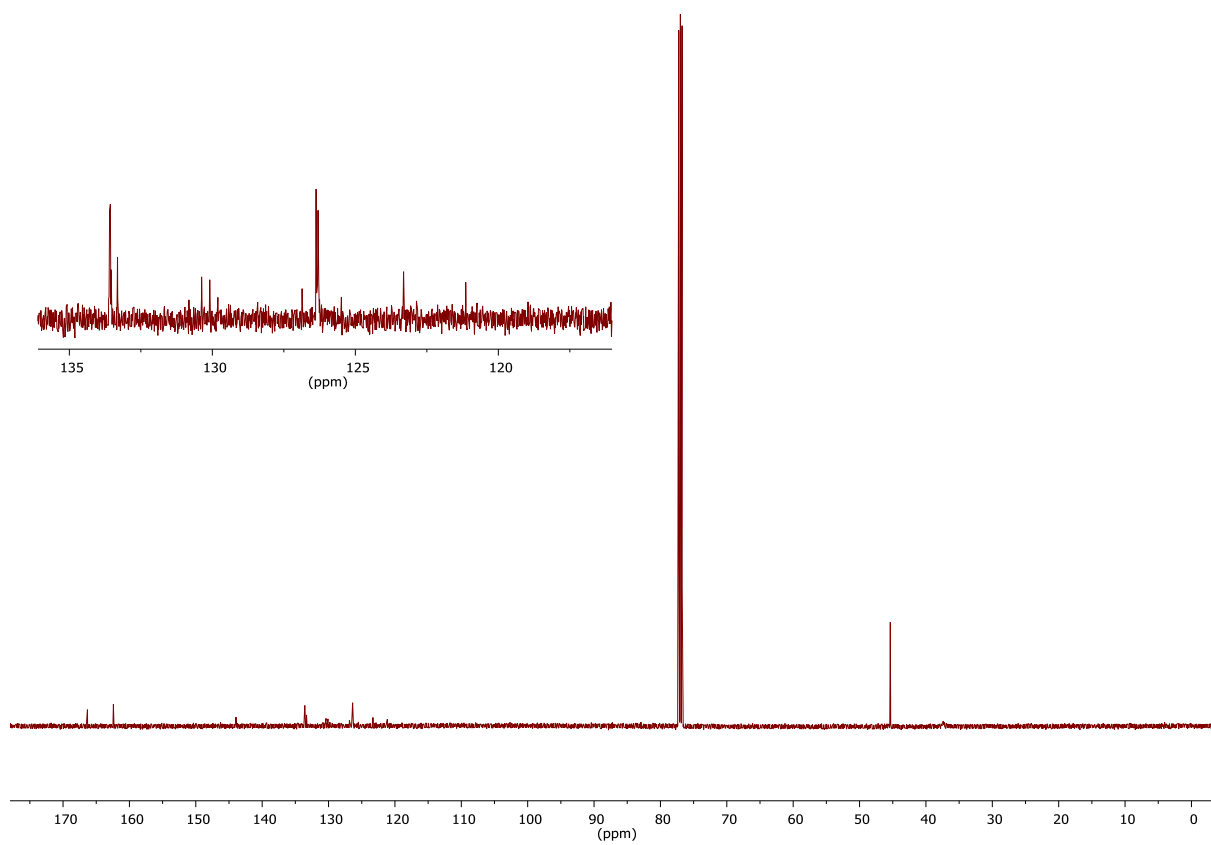

Figure S18B  $^{13}\text{C-NMR}$  (100 MHz) of **16c** in  $\text{CDCl}_3$ .

Sample Information

Sample Name :  
 Tray# : 1  
 Vial# : 28  
 Injection Volume : 5  
 Data File : AR185.lcd  
 Method File : MSP5-95\_30min\_1.0.lcm  
 Batch File : Batch170521\_2.lcb  
 Report Format File : Reportformat1.lsr  
 Date Acquired : 18.05.2021 03:04:37  
 Date Processed : 18.05.2021 03:34:39

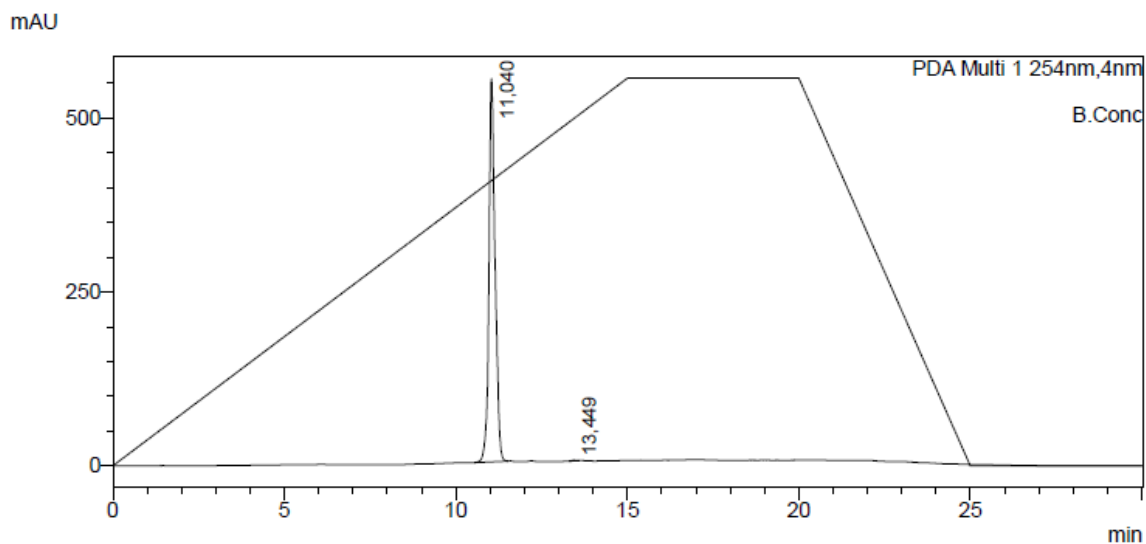

PDA Ch1 254nm

| Peak# | Ret. Time | Area    | Height | Area%   |
|-------|-----------|---------|--------|---------|
| 1     | 11,040    | 6887676 | 551521 | 99,875  |
| 2     | 13,449    | 8615    | 1106   | 0,125   |
| Total |           | 6896291 | 552627 | 100,000 |

Figure S18C HPLC chromatogram of **16c**.

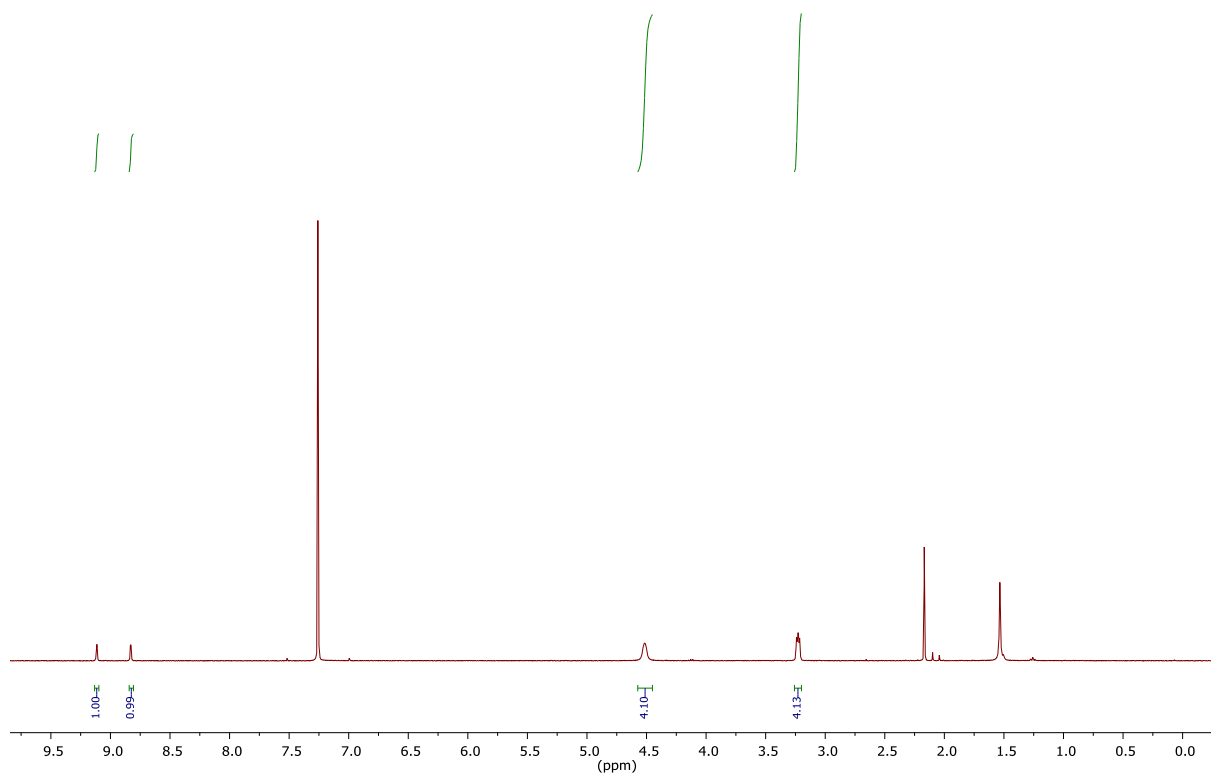

Figure S19A  $^1\text{H-NMR}$  (400 MHz) of **16d** in  $\text{CDCl}_3$ .

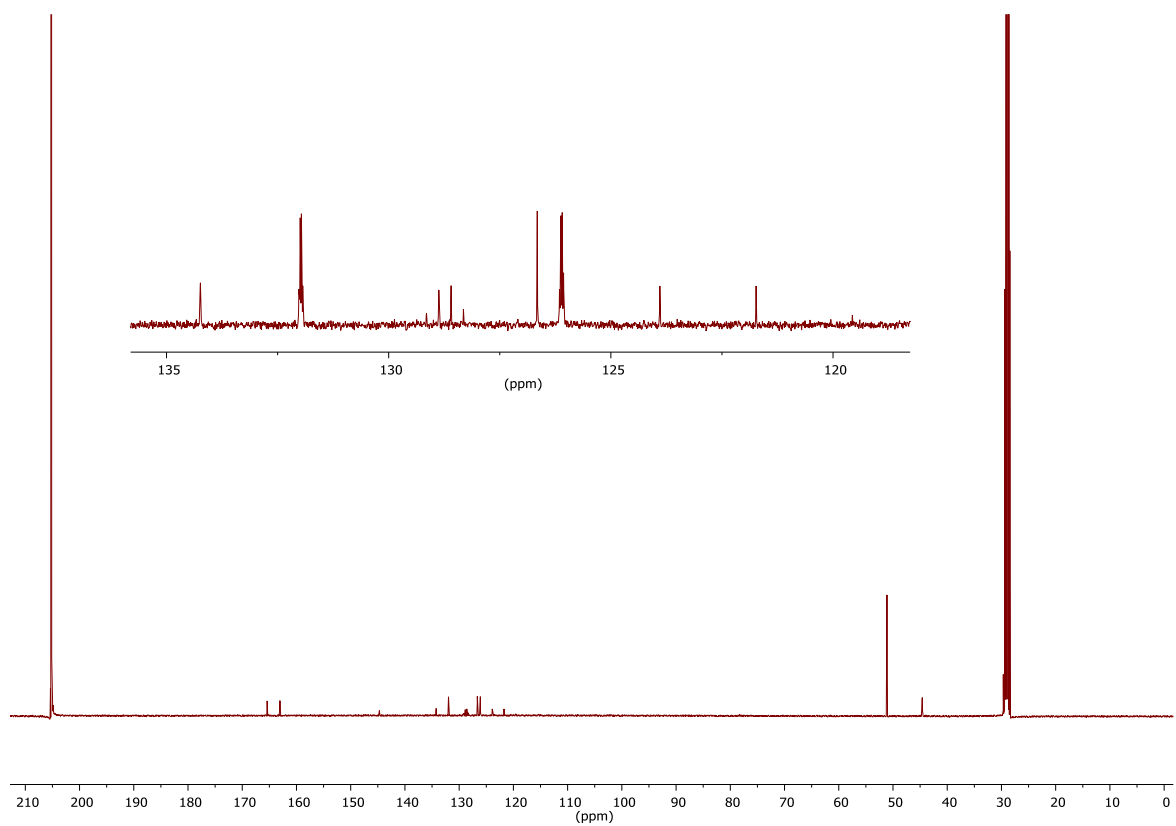

Figure S19B  $^{13}\text{C-NMR}$  (125 MHz) of **16d** in  $\text{Acetone } d_6$ .



Sample Information

Sample Name :  
 Tray# : 1  
 Vial# : 36  
 Injection Volume : 5  
 Data File : IF242.lcd  
 Method File : MSP5-95\_30min\_1.0.lcm  
 Batch File : Batch170521\_2.lcb  
 Report Format File : Reportformat1.lsr  
 Date Acquired : 18.05.2021 07:08:51  
 Date Processed : 18.05.2021 07:38:54

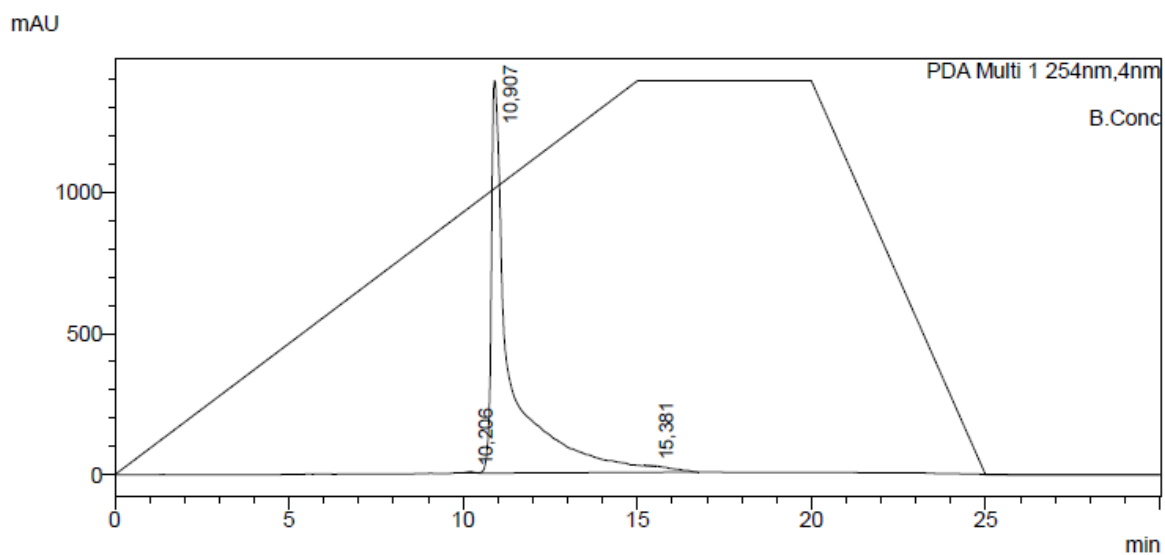

PDA Ch1 254nm

| Peak# | Ret. Time | Area     | Height  | Area%   |
|-------|-----------|----------|---------|---------|
| 1     | 10,206    | 96170    | 5599    | 0,179   |
| 2     | 10,907    | 53711942 | 1386031 | 99,801  |
| 3     | 15,381    | 10925    | 1276    | 0,020   |
| Total |           | 53819037 | 1392905 | 100,000 |

Figure S19C HPLC chromatogram of **16d**.

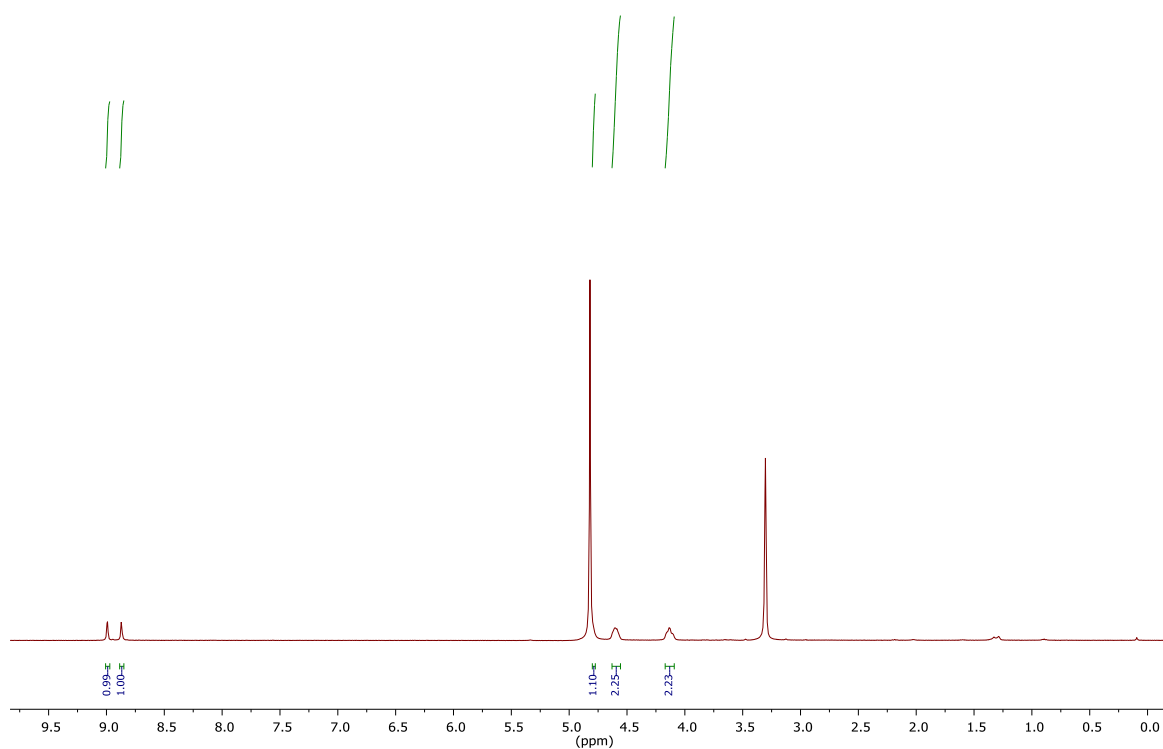

Figure S20A  $^1\text{H-NMR}$  (400 MHz) of **17b** in  $\text{CD}_3\text{OD}$ .

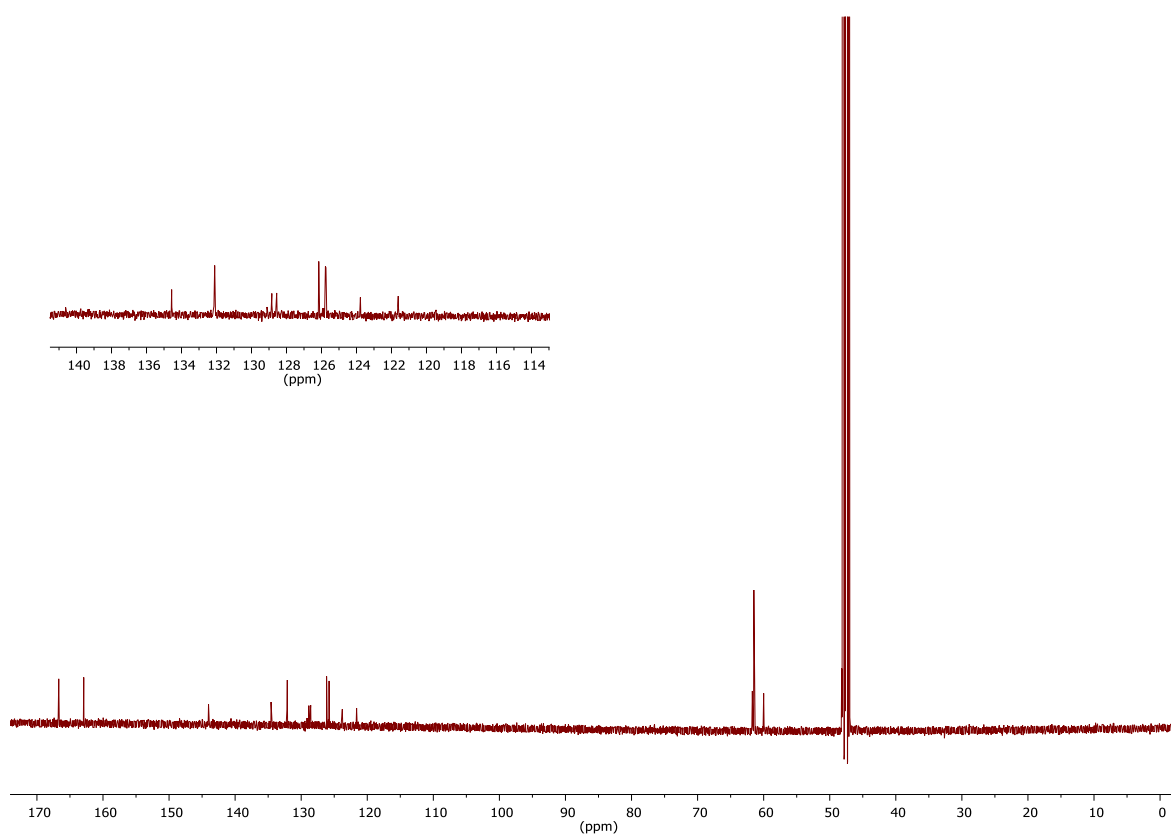

Figure S20B  $^{13}\text{C-NMR}$  (100 MHz) of **17b** in  $\text{CD}_3\text{OD}$ .

Sample Information

Sample Name :  
 Tray# : 1  
 Vial# : 20  
 Injection Volume : 5  
 Data File : AR100.lcd  
 Method File : MSP5-95\_30min\_1.0.lcm  
 Batch File : Batch170521\_2.lcb  
 Report Format File : Reportformat1.lsr  
 Date Acquired : 17.05.2021 23:00:23  
 Date Processed : 17.05.2021 23:30:26

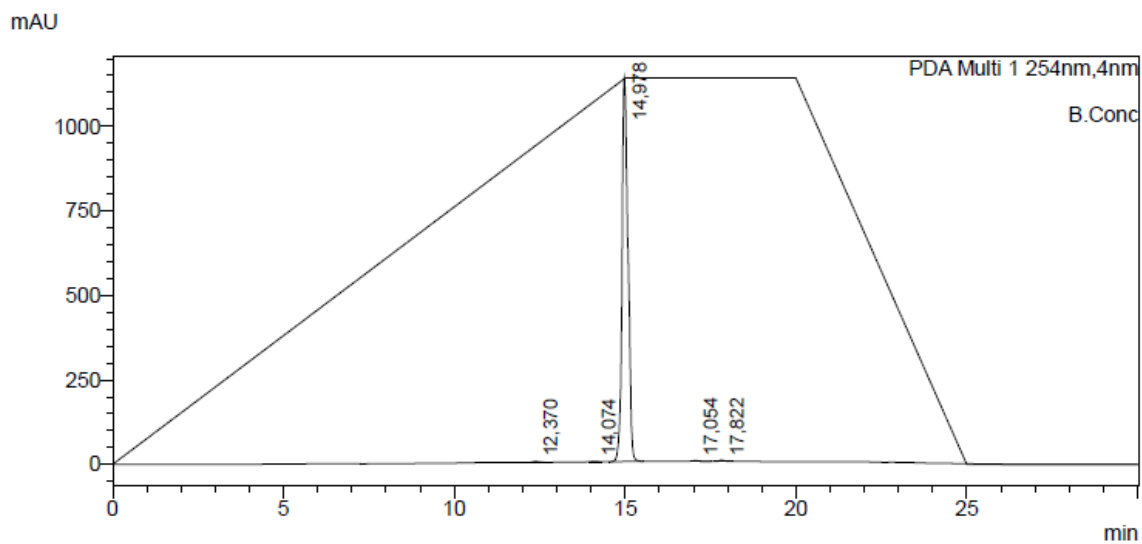

PDA Ch1 254nm

| Peak# | Ret. Time | Area     | Height  | Area%   |
|-------|-----------|----------|---------|---------|
| 1     | 12,370    | 28376    | 2417    | 0,205   |
| 2     | 14,074    | 17833    | 1784    | 0,129   |
| 3     | 14,978    | 13710356 | 1133975 | 99,230  |
| 4     | 17,054    | 17220    | 1632    | 0,125   |
| 5     | 17,822    | 43024    | 3773    | 0,311   |
| Total |           | 13816810 | 1143582 | 100,000 |

Figure S20C HPLC trace of **17b**.

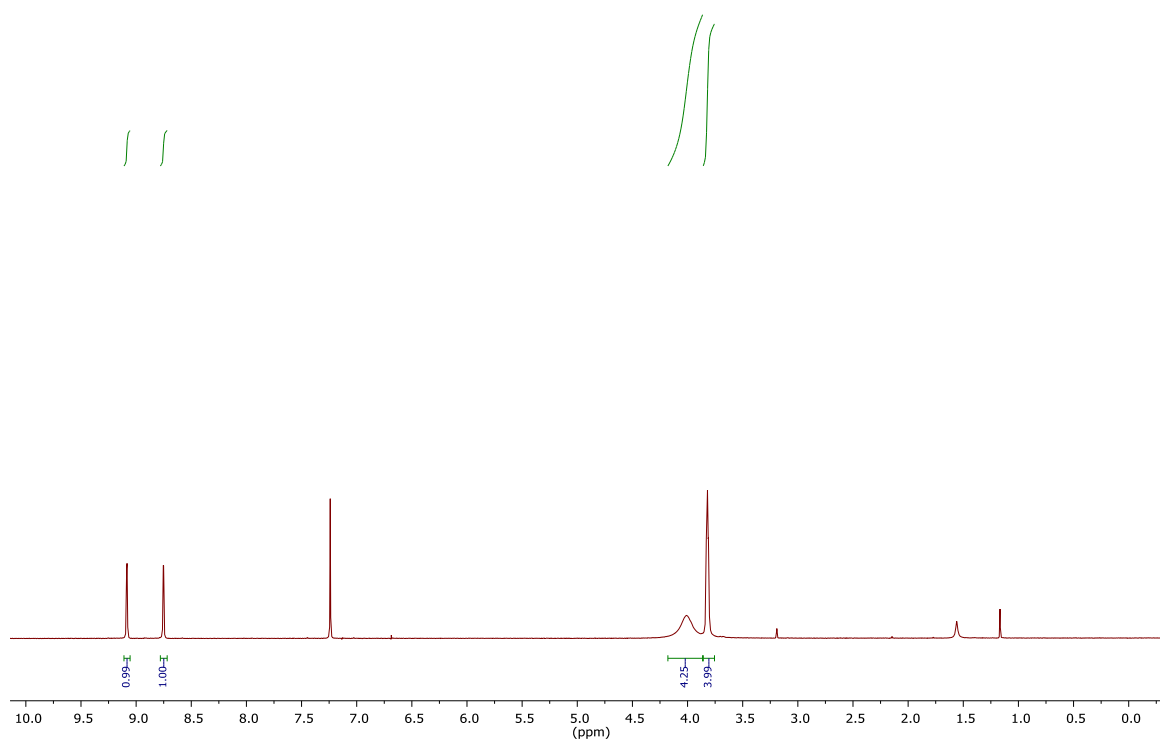

Figure S21A  $^1\text{H-NMR}$  (400 MHz) of **18b** in  $\text{CDCl}_3$ .

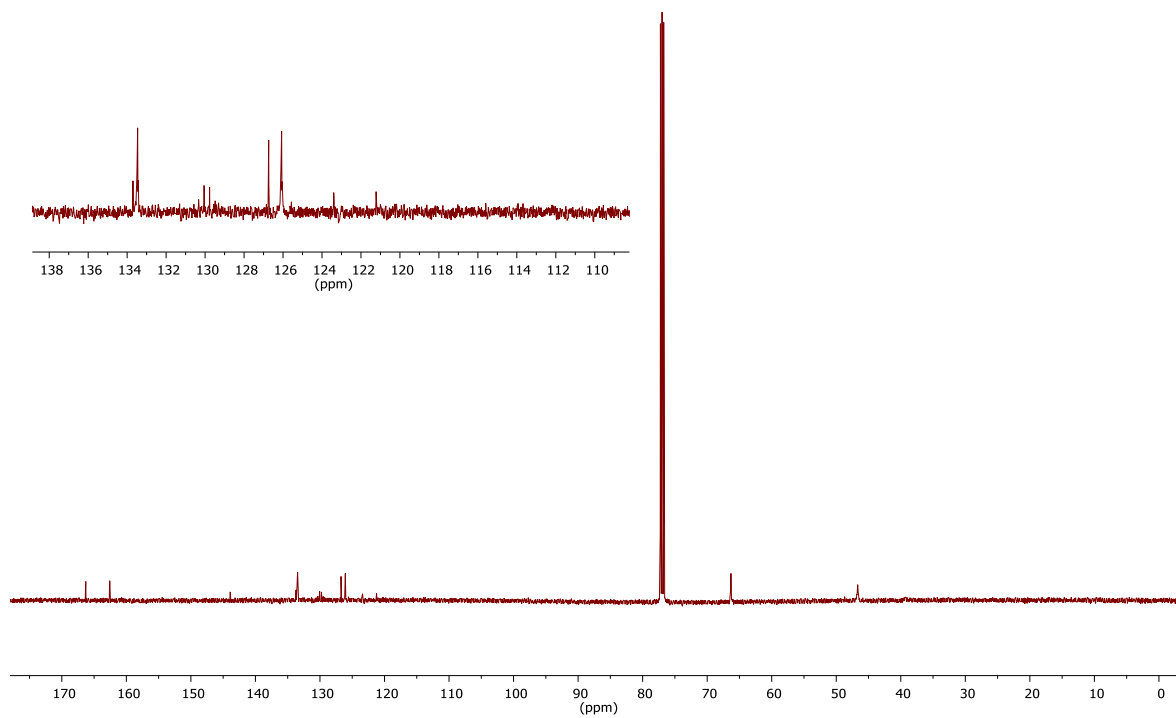

Figure S21B  $^{13}\text{C-NMR}$  (100 MHz) of **18b** in  $\text{CDCl}_3$ .

Sample Information

Sample Name :  
 Tray# : 1  
 Vial# : 35  
 Injection Volume : 10  
 Data File : IR58\_WDH.lcd  
 Method File : MSP5-95\_30min\_1.0.lcm  
 Batch File : Batch170521\_2.lcb  
 Report Format File : Reportformat1.lsr  
 Date Acquired : 18.05.2021 09:41:29  
 Date Processed : 18.05.2021 10:11:32

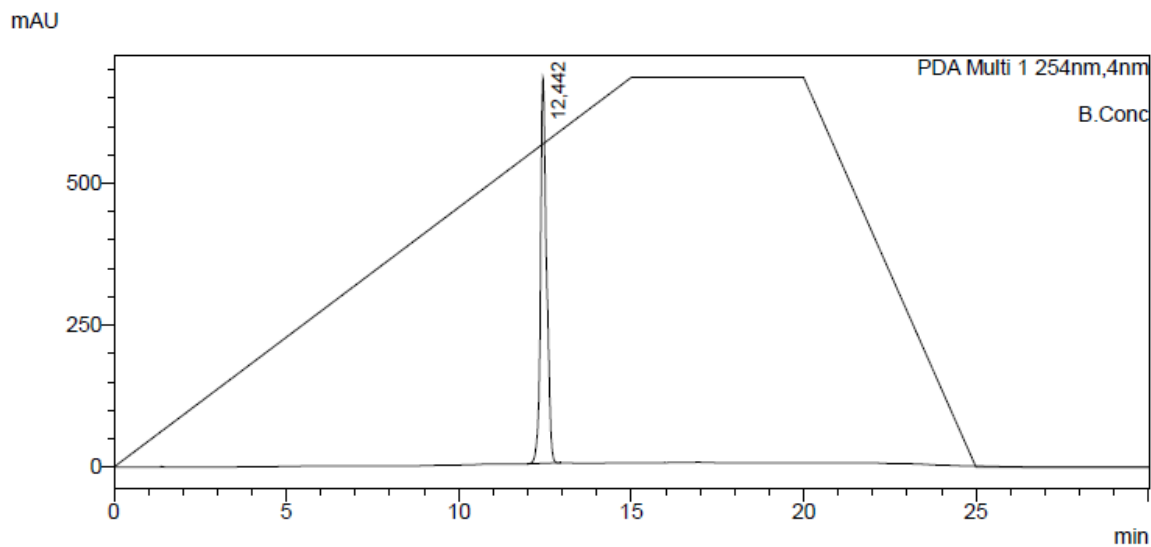

PDA Ch1 254nm

| Peak# | Ret. Time | Area    | Height | Area%   |
|-------|-----------|---------|--------|---------|
| 1     | 12,442    | 8255951 | 679591 | 100,000 |
| Total |           | 8255951 | 679591 | 100,000 |

Figure S21C HPLC chromatogram of **18b**.

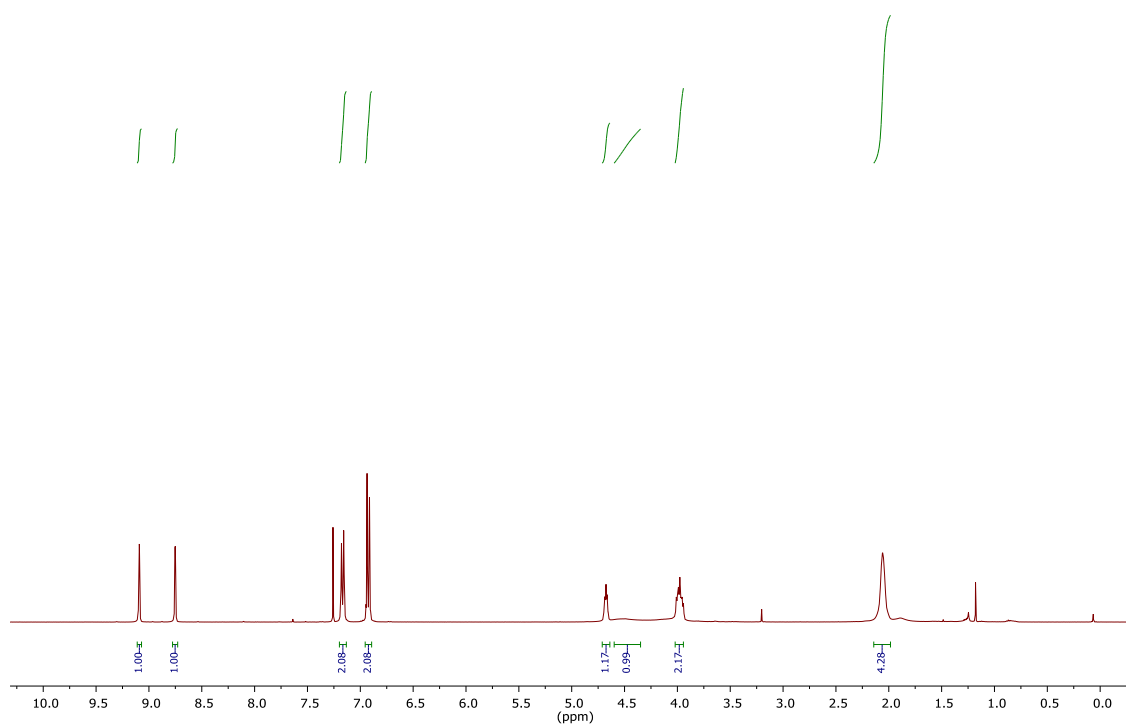

Figure S22A  $^1\text{H-NMR}$  (400 MHz) of **19b** in  $\text{CDCl}_3$ .

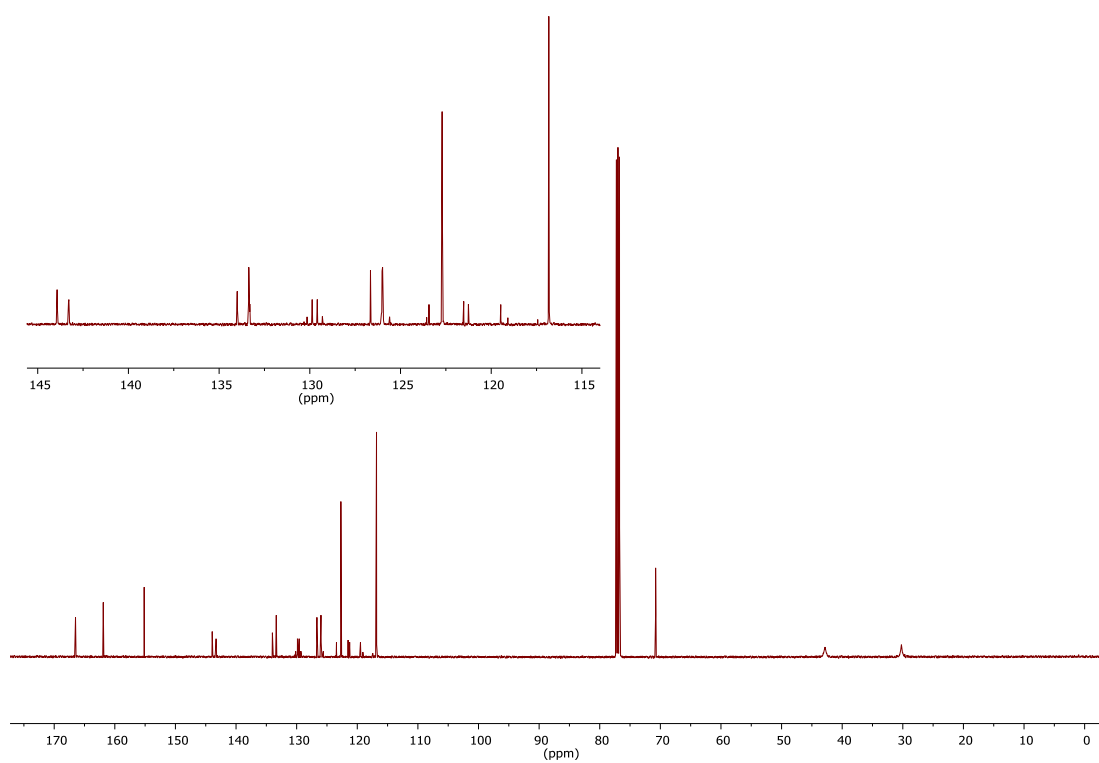

Figure S22B  $^{13}\text{C-NMR}$  (100 MHz) of **19b** in  $\text{CDCl}_3$ .

Sample Information

Sample Name :  
 Tray# : 1  
 Vial# : 32  
 Injection Volume : 5  
 Data File : AR106.lcd  
 Method File : MSP5-95\_30min\_1.0.lcm  
 Batch File : Batch170521\_2.lcb  
 Report Format File : Reportformat1.lsr  
 Date Acquired : 18.05.2021 05:06:48  
 Date Processed : 18.05.2021 05:36:49

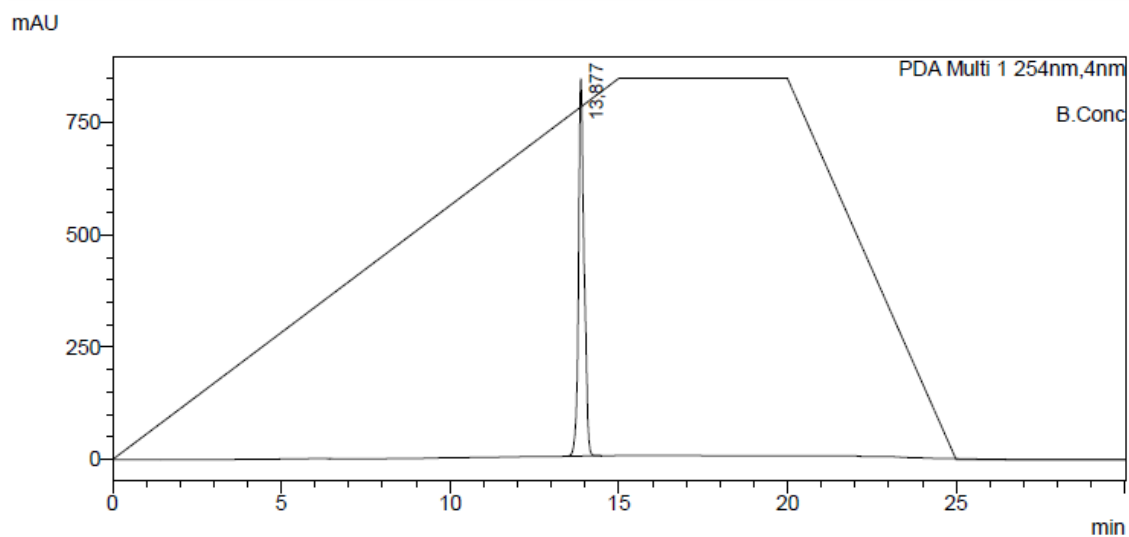

PDA Ch1 254nm

| Peak# | Ret. Time | Area    | Height | Area%   |
|-------|-----------|---------|--------|---------|
| 1     | 13,877    | 9735294 | 840298 | 100,000 |
| Total |           | 9735294 | 840298 | 100,000 |

Figure S22C HPLC chromatogram of **19b**.

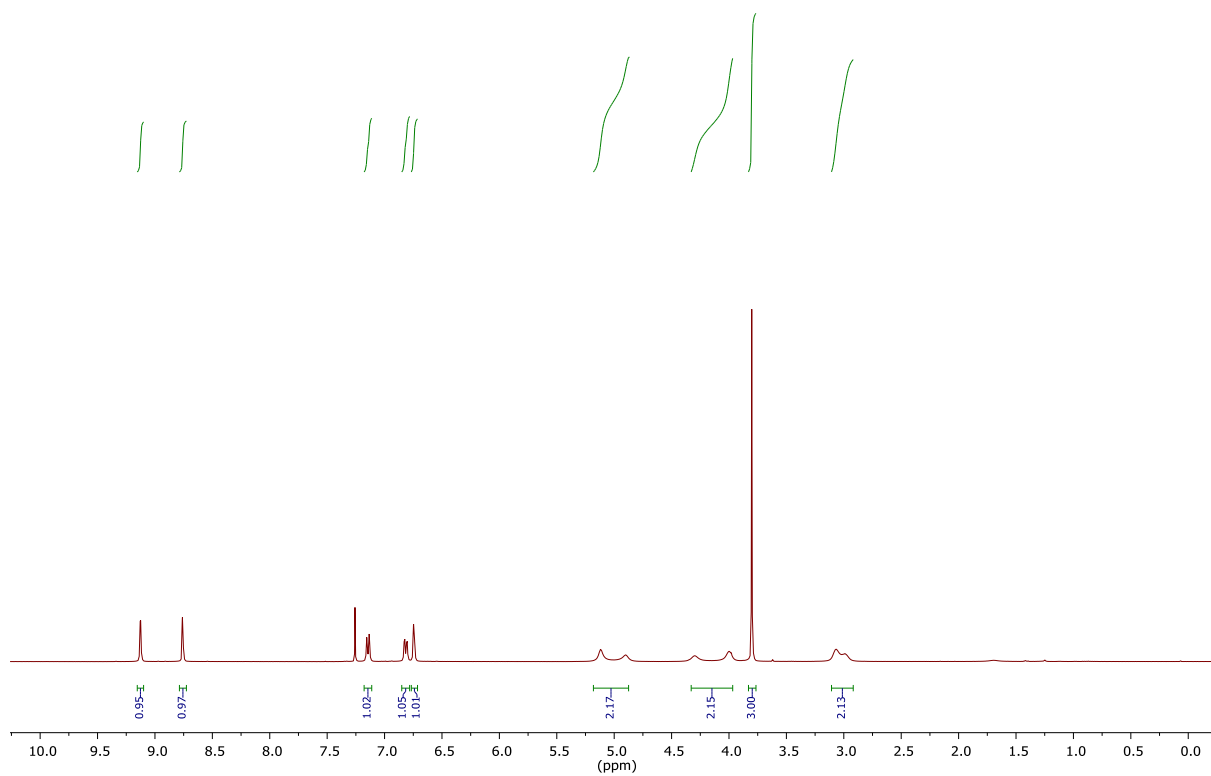

Figure S23A  $^1\text{H-NMR}$  (400 MHz) of **20b** in  $\text{CDCl}_3$ .

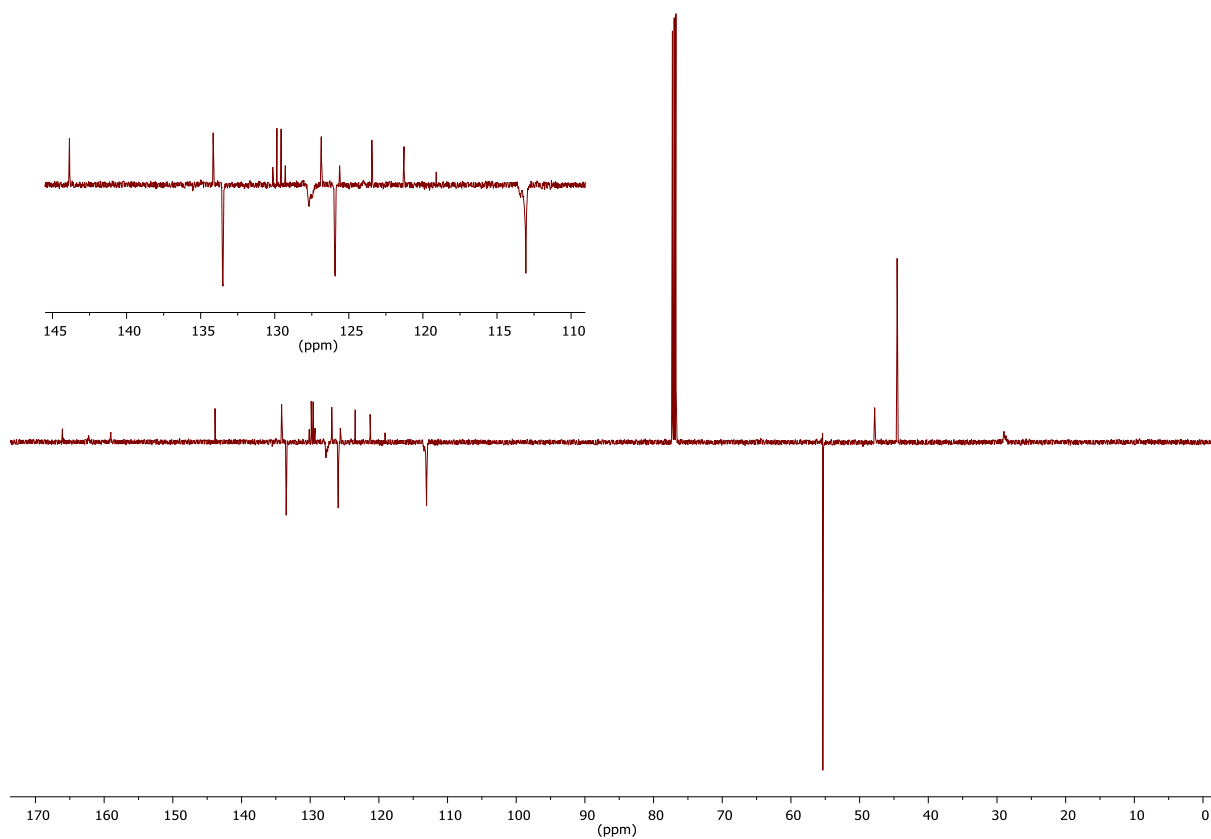

Figure S23B  $^{13}\text{C-NMR}$  (100 MHz) of **20b** in  $\text{CDCl}_3$ .



Sample Information

Sample Name :  
 Tray# : 1  
 Vial# : 27  
 Injection Volume : 5  
 Data File : AR112.lcd  
 Method File : MSP5-95\_30min\_1.0.lcm  
 Batch File : Batch170521\_2.lcb  
 Report Format File : Reportformat1.lsr  
 Date Acquired : 18.05.2021 02:34:06  
 Date Processed : 18.05.2021 03:04:08

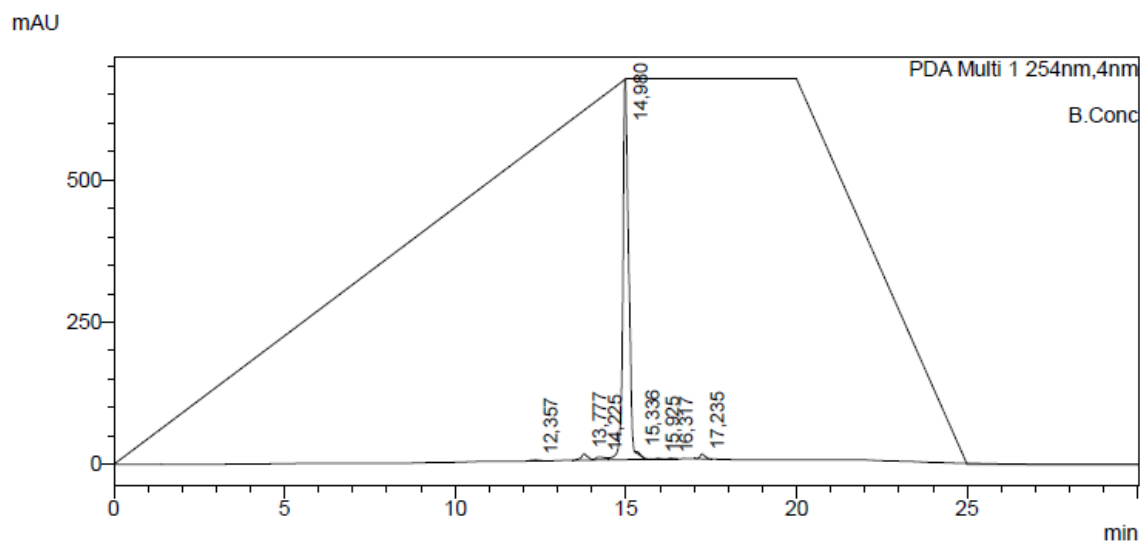

PDA Ch1 254nm

| Peak# | Ret. Time | Area    | Height | Area%   |
|-------|-----------|---------|--------|---------|
| 1     | 12.357    | 28911   | 1980   | 0,348   |
| 2     | 13.777    | 145028  | 11014  | 1,745   |
| 3     | 14.225    | 100643  | 5364   | 1,211   |
| 4     | 14.980    | 7910461 | 669598 | 95,166  |
| 5     | 15.336    | 20315   | 2841   | 0,244   |
| 6     | 15.925    | 12270   | 1226   | 0,148   |
| 7     | 16.317    | 9693    | 1105   | 0,117   |
| 8     | 17.235    | 84927   | 8409   | 1,022   |
| Total |           | 8312247 | 701538 | 100,000 |

Figure S23C HPLC chromatogram of **20b**.

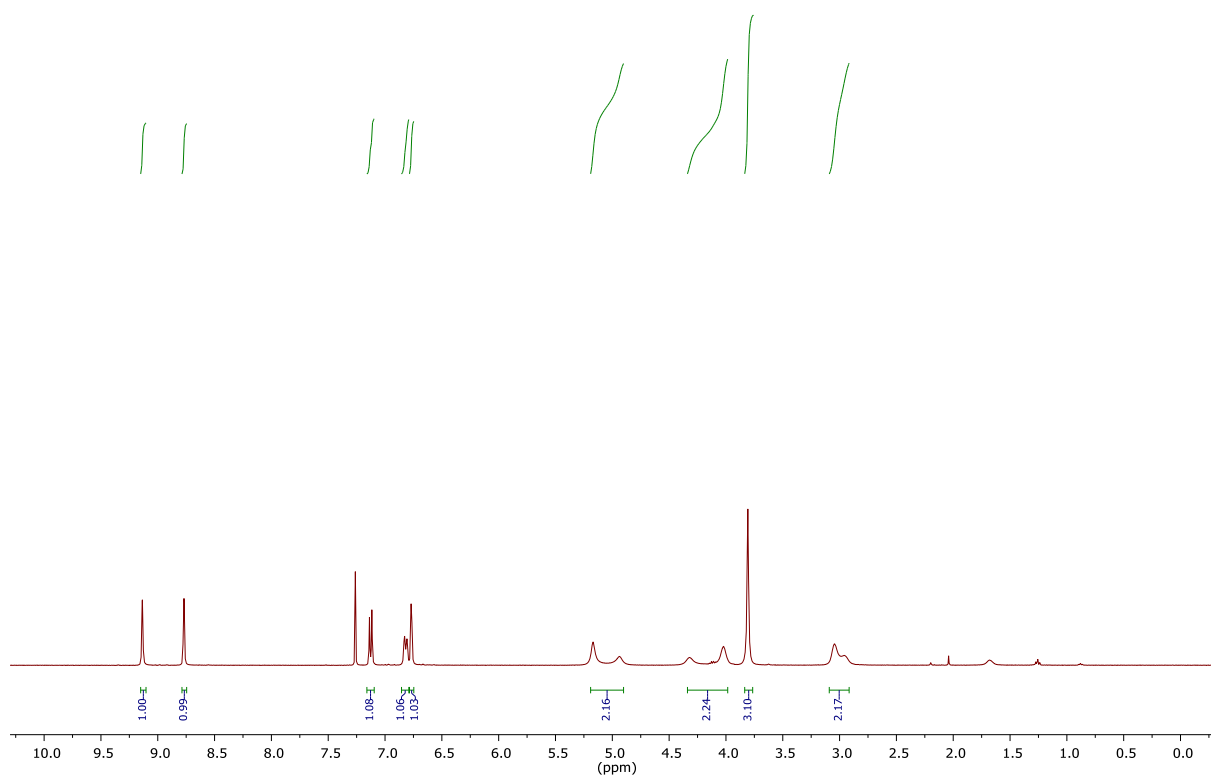

Figure S24A  $^1\text{H-NMR}$  (400 MHz) of **21b** in  $\text{CDCl}_3$ .

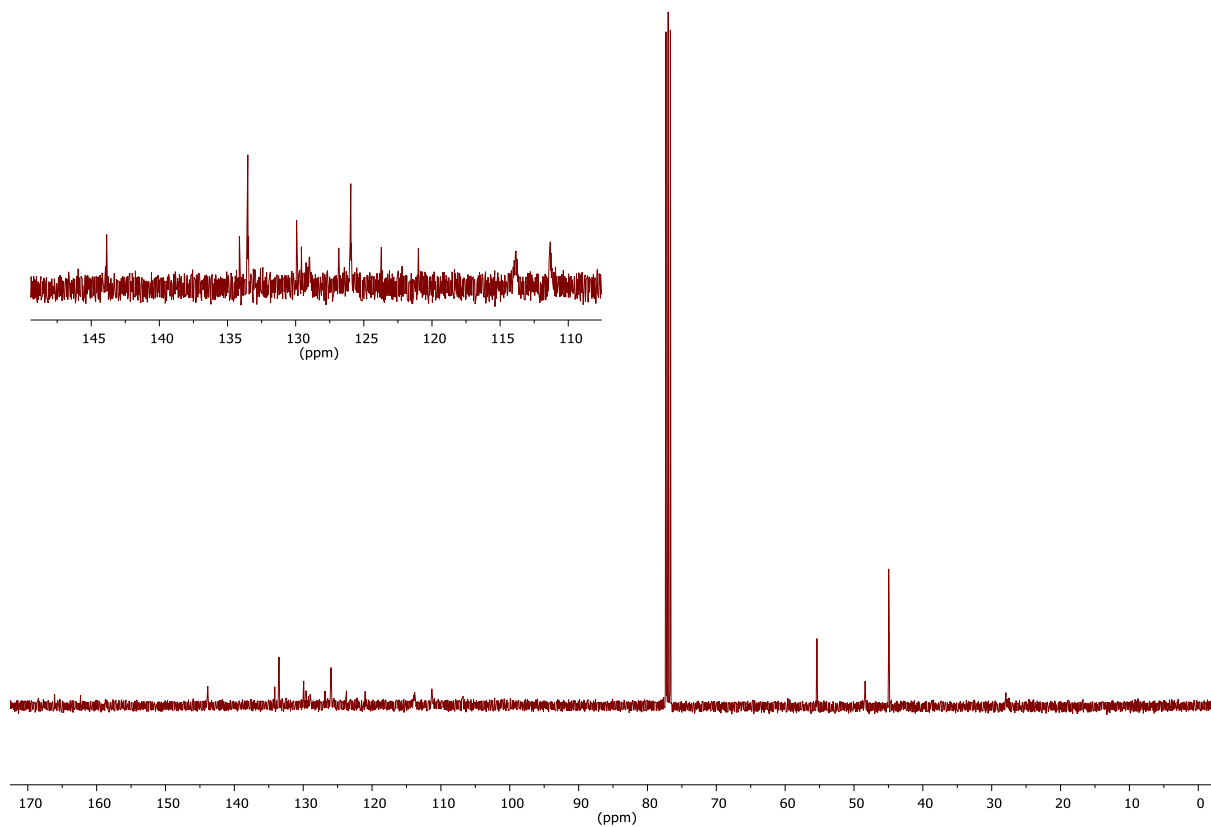

Figure S24B  $^{13}\text{C-NMR}$  (100 MHz) of **21b** in  $\text{CDCl}_3$ .

Sample Information

Sample Name :  
 Tray# : 0  
 Vial# : 4  
 Injection Volume : 10  
 Data File : AR130\_270521.lcd  
 Method File : MSP5-95\_30min\_1.0.lcm  
 Batch File : Batch270521\_1.lcb  
 Report Format File : Reportformat1.lsr  
 Date Acquired : 27.05.2021 10:20:39  
 Date Processed : 27.05.2021 10:50:44

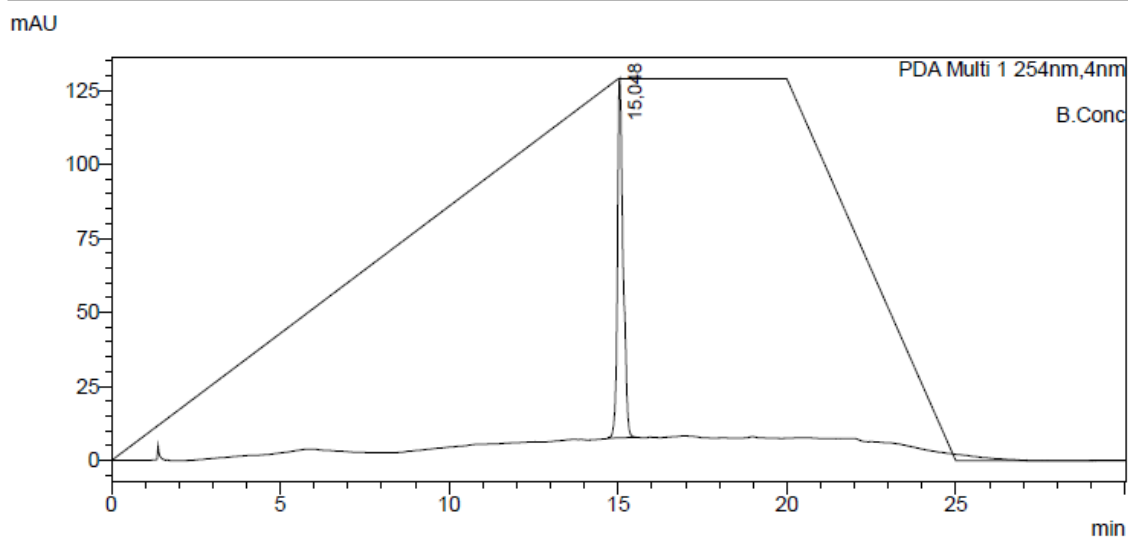

PDA Ch1 254nm

| Peak# | Ret. Time | Area    | Height | Area%   |
|-------|-----------|---------|--------|---------|
| 1     | 15,048    | 1414410 | 121218 | 100,000 |
| Total |           | 1414410 | 121218 | 100,000 |

Figure S24C HPLC chromatogram of **21b**.

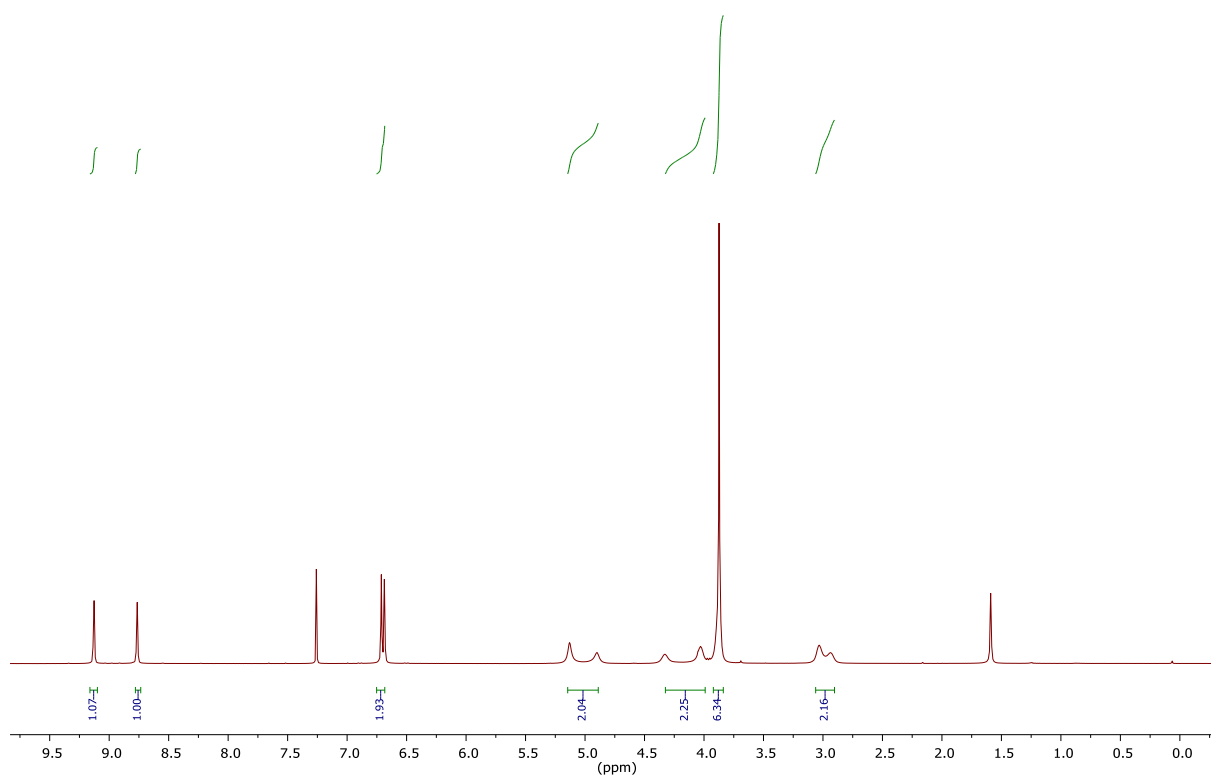

Figure S25A  $^1\text{H-NMR}$  (400 MHz) of **22b** in  $\text{CDCl}_3$ .

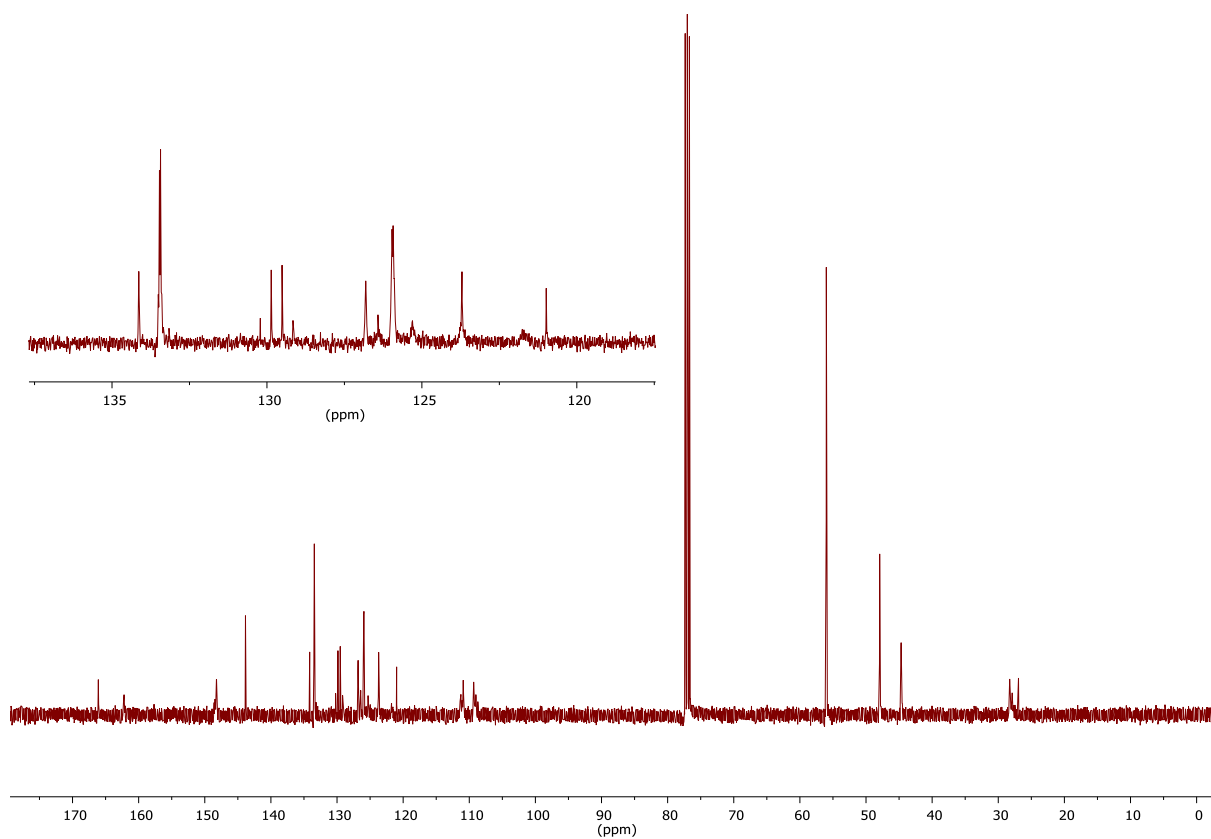

Figure S25B  $^{13}\text{C-NMR}$  (100 MHz) of **22b** in  $\text{CDCl}_3$ .

Sample Information

Sample Name :  
 Tray# : 1  
 Vial# : 29  
 Injection Volume : 5  
 Data File : AR204.lcd  
 Method File : MSP5-95\_30min\_1.0.lcm  
 Batch File : Batch170521\_2.lcb  
 Report Format File : Reportformat1.lsr  
 Date Acquired : 18.05.2021 03:35:09  
 Date Processed : 18.05.2021 04:05:12

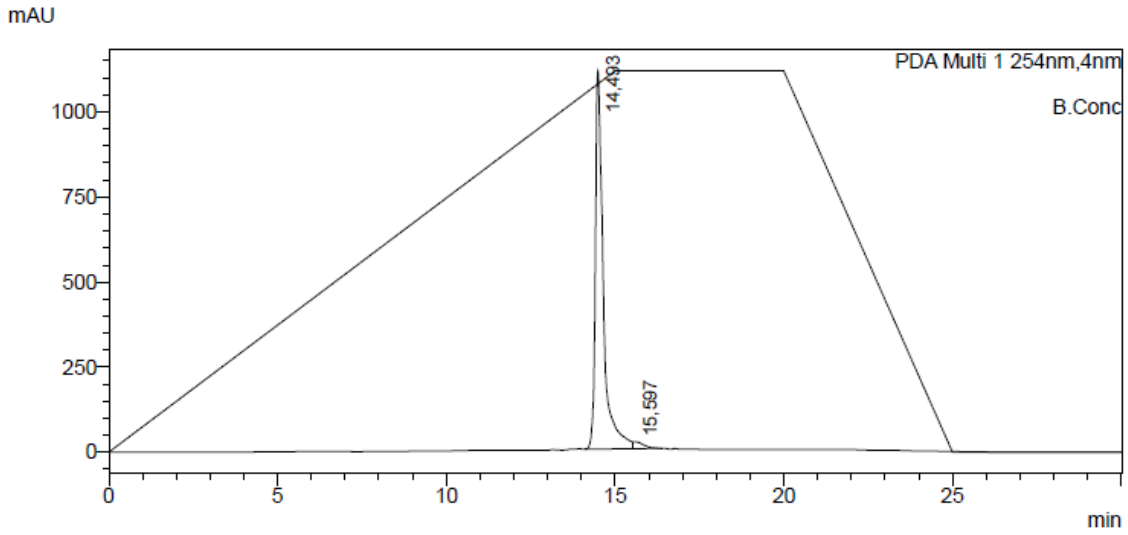

PDA Ch1 254nm

| Peak# | Ret. Time | Area     | Height  | Area%   |
|-------|-----------|----------|---------|---------|
| 1     | 14,493    | 18243079 | 1110956 | 97,734  |
| 2     | 15,597    | 423013   | 20462   | 2,266   |
| Total |           | 18666092 | 1131418 | 100,000 |

Figure S25C HPLC chromatogram of **22b**.

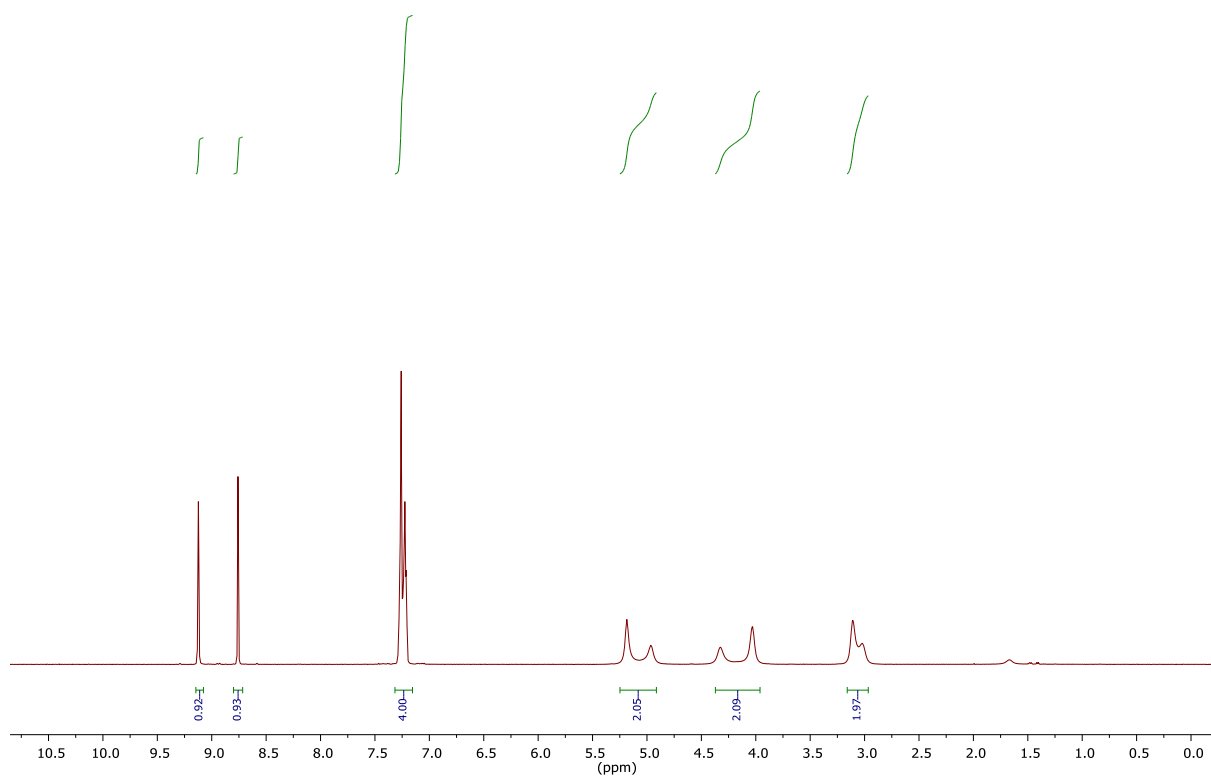

Figure S26A  $^1\text{H-NMR}$  (400 MHz) of **23b** in  $\text{CDCl}_3$ .

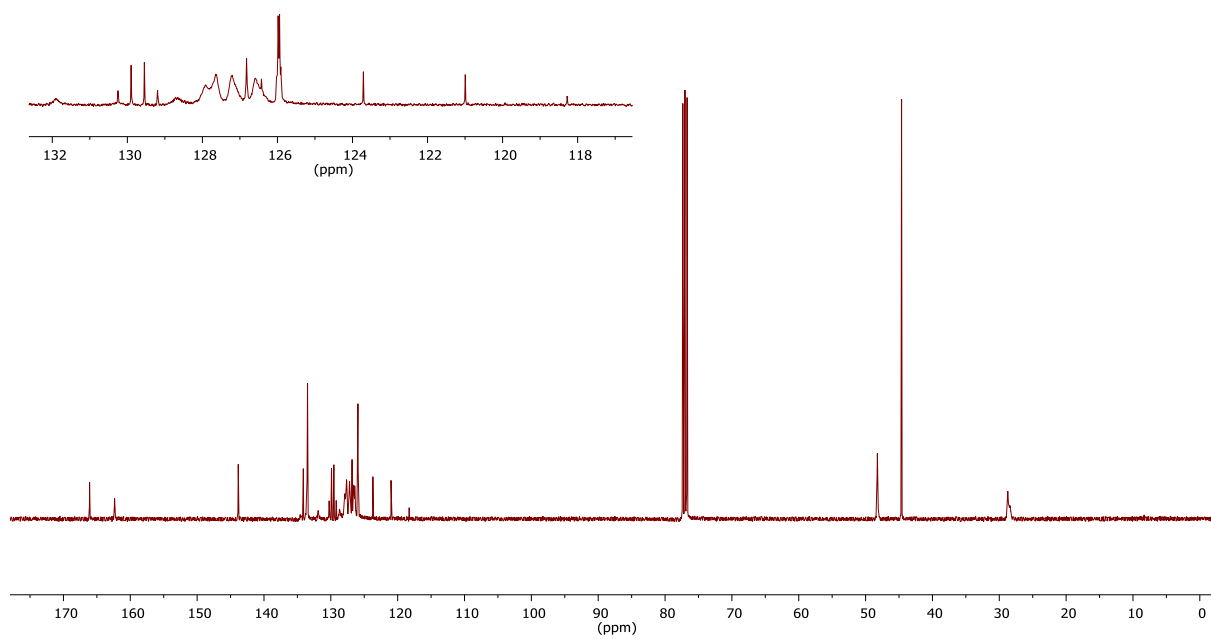

Figure S26B  $^{13}\text{C-NMR}$  (100 MHz) of **23b** in  $\text{CDCl}_3$ .

Sample Information

Sample Name :  
 Tray# : 1  
 Vial# : 4  
 Injection Volume : 10  
 Data File : AR196.lcd  
 Method File : MSP5-95\_30min\_1.0.lcm  
 Batch File : Batch170521\_2.lcb  
 Report Format File : Reportformat1.lsr  
 Date Acquired : 17.05.2021 14:51:56  
 Date Processed : 18.05.2021 06:41:44

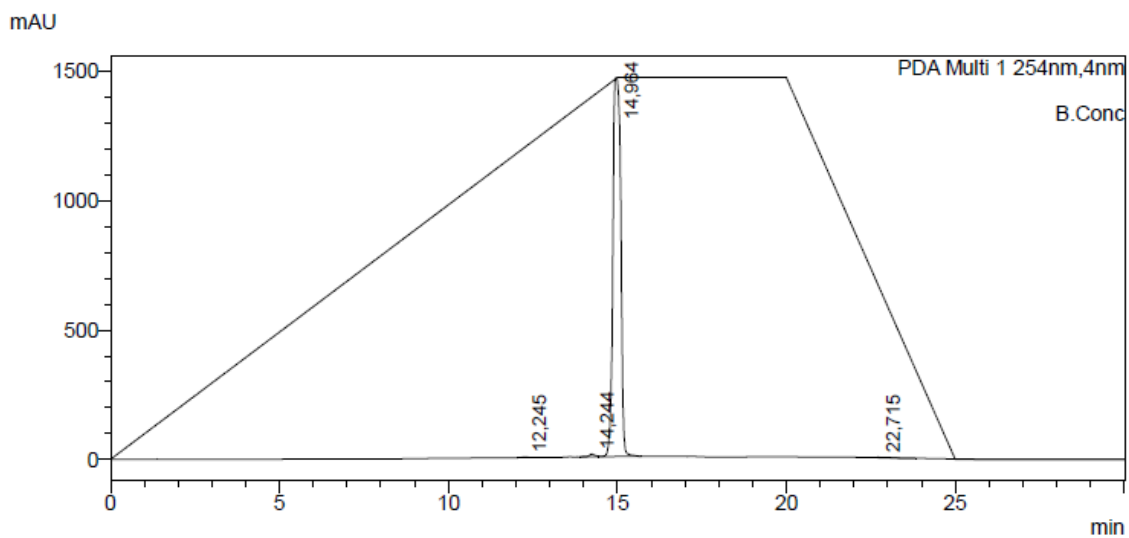

PDA Ch1 254nm

| Peak# | Ret. Time | Area     | Height  | Area%   |
|-------|-----------|----------|---------|---------|
| 1     | 12,245    | 38932    | 2735    | 0,164   |
| 2     | 14,244    | 128647   | 9891    | 0,541   |
| 3     | 14,964    | 23581511 | 1464831 | 99,141  |
| 4     | 22,715    | 36829    | 1770    | 0,155   |
| Total |           | 23785919 | 1479227 | 100,000 |

Figure S26C HPLC trace of **23b**.

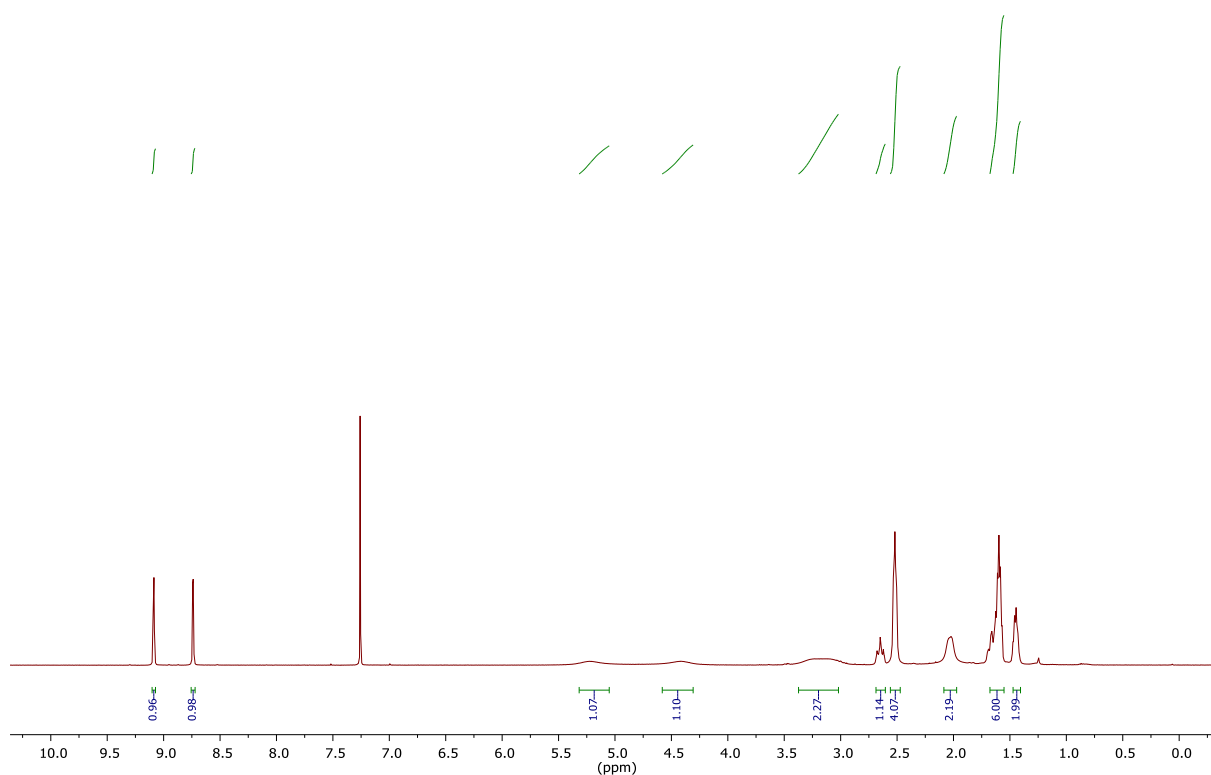

Figure S27A  $^1\text{H-NMR}$  (400 MHz) of **24b** in  $\text{CDCl}_3$ .

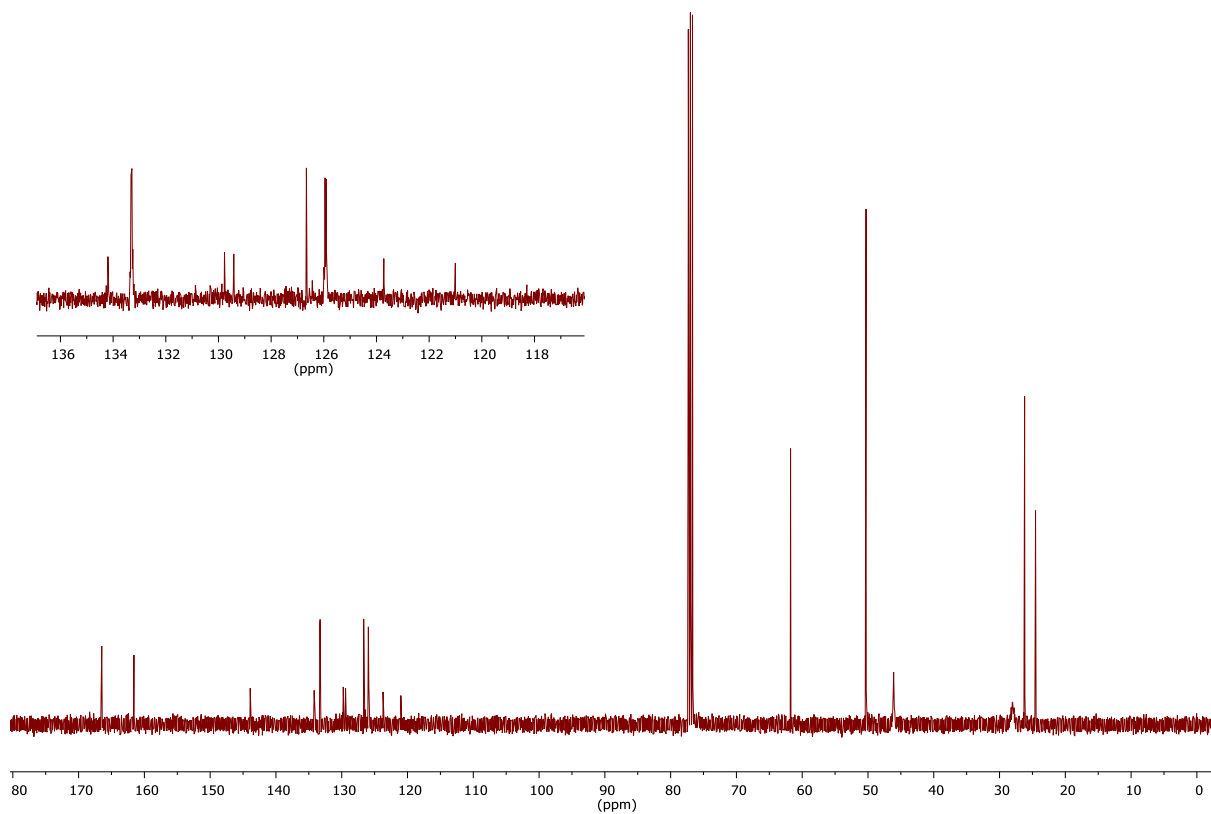

Figure S27B  $^{13}\text{C-NMR}$  (100 MHz) of **24b** in  $\text{CDCl}_3$ .



Sample Information

Sample Name :  
 Tray# : 1  
 Vial# : 33  
 Injection Volume : 5  
 Data File : AR107.lcd  
 Method File : MSP5-95\_30min\_1.0.lcm  
 Batch File : Batch170521\_2.lcb  
 Report Format File : Reportformat1.lsr  
 Date Acquired : 18.05.2021 05:37:18  
 Date Processed : 18.05.2021 06:07:20

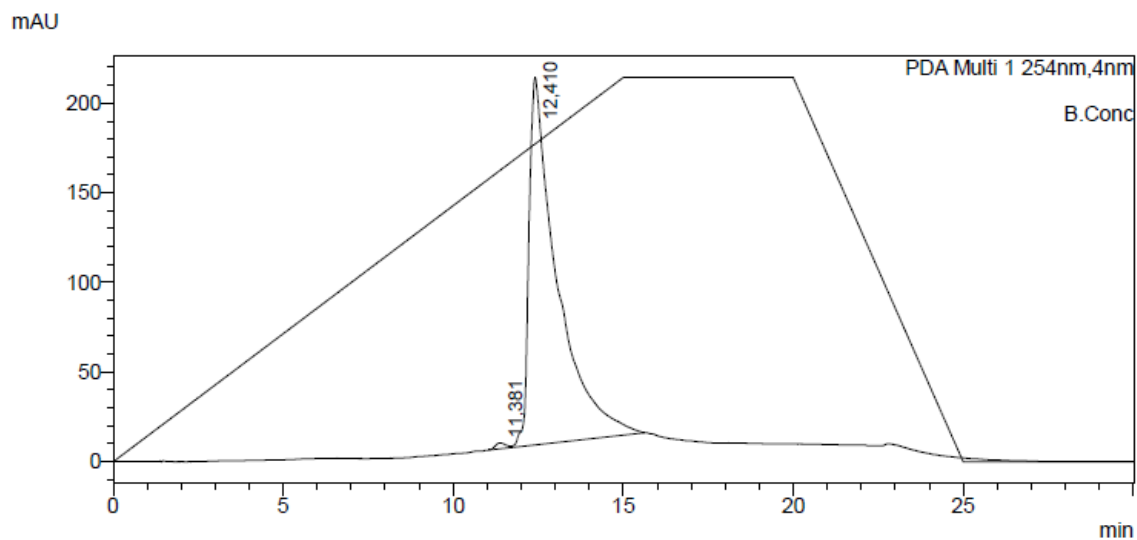

PDA Ch1 254nm

| Peak# | Ret. Time | Area     | Height | Area%   |
|-------|-----------|----------|--------|---------|
| 1     | 11,381    | 68461    | 3277   | 0,575   |
| 2     | 12,410    | 11830837 | 204963 | 99,425  |
| Total |           | 11899297 | 208240 | 100,000 |

Figure S27C HPLC chromatogram of **24b**.

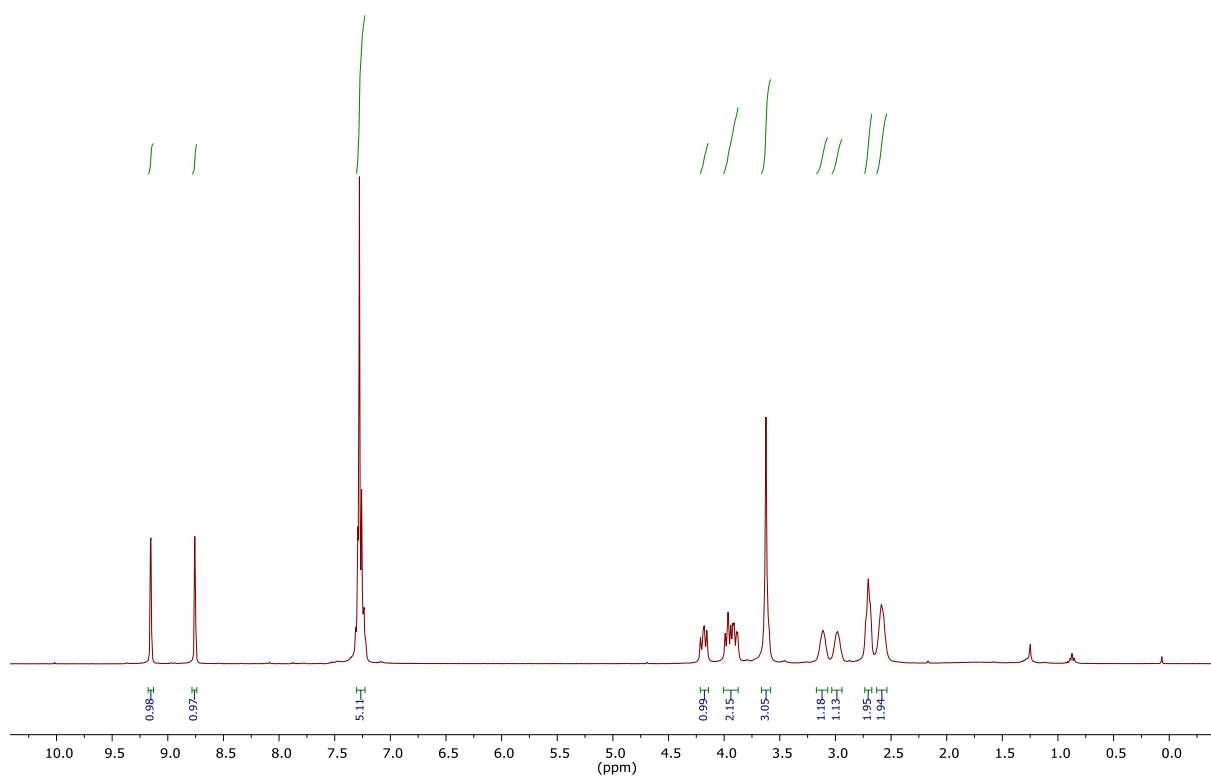

Figure S28A  $^1\text{H-NMR}$  (400 MHz) of **26b** in  $\text{CDCl}_3$ .

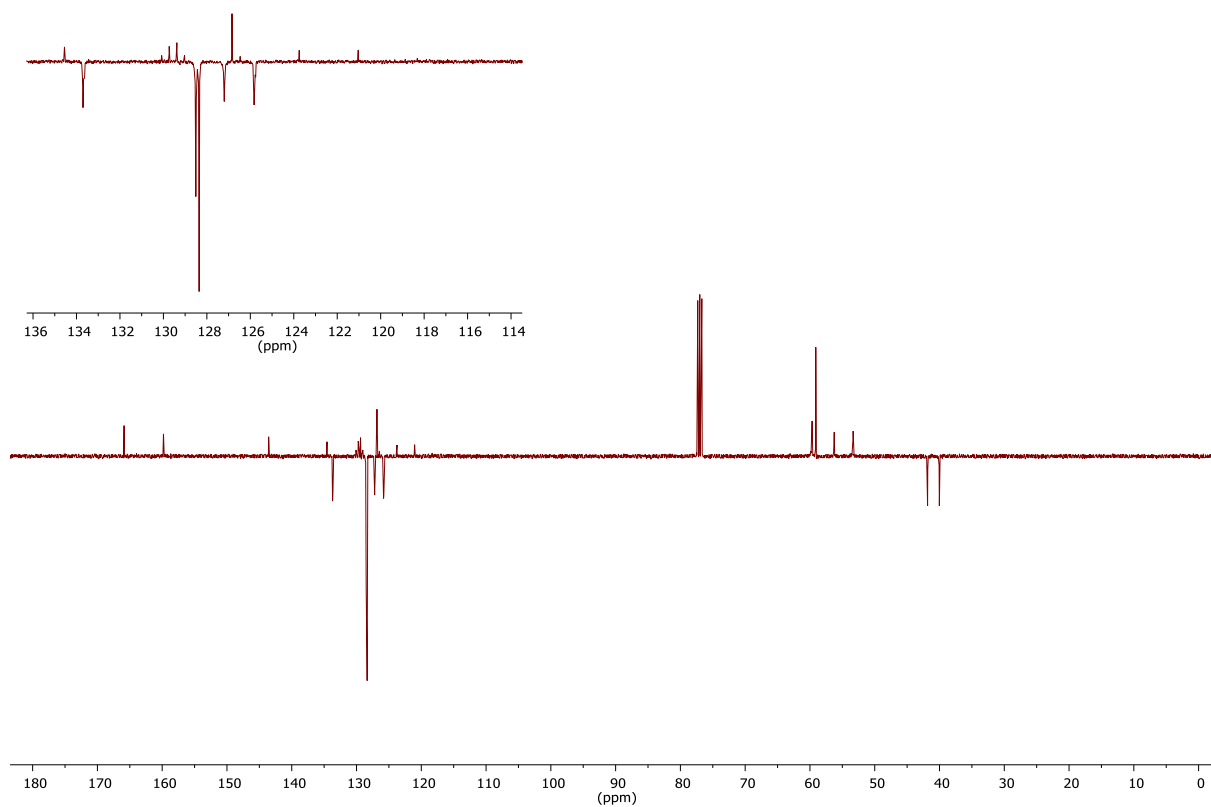

Figure S28B  $^{13}\text{C-NMR}$  (100 MHz) of **26b** in  $\text{CDCl}_3$ .

Sample Information

Sample Name :  
 Tray# : 0  
 Vial# : 10  
 Injection Volume : 10  
 Data File : AR115\_200521.lcd  
 Method File : MSP5-95\_30min\_1.0.lcm  
 Batch File : Batch190521\_1.lcb  
 Report Format File : Reportformat1.lsr  
 Date Acquired : 21.05.2021 00:02:09  
 Date Processed : 21.05.2021 00:32:11

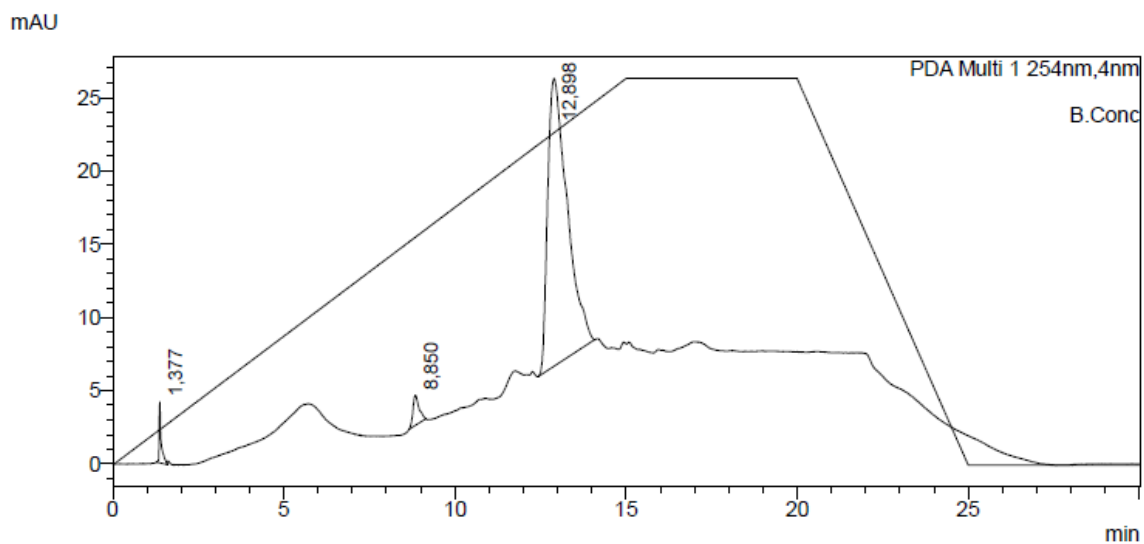

PDA Ch1 254nm

| Peak# | Ret. Time | Area   | Height | Area%   |
|-------|-----------|--------|--------|---------|
| 1     | 1,377     | 16295  | 4188   | 1,985   |
| 2     | 8,850     | 25700  | 2052   | 3,130   |
| 3     | 12,898    | 778981 | 19632  | 94,885  |
| Total |           | 820976 | 25871  | 100,000 |

Figure S28C HPLC chromatogram of **25b**.

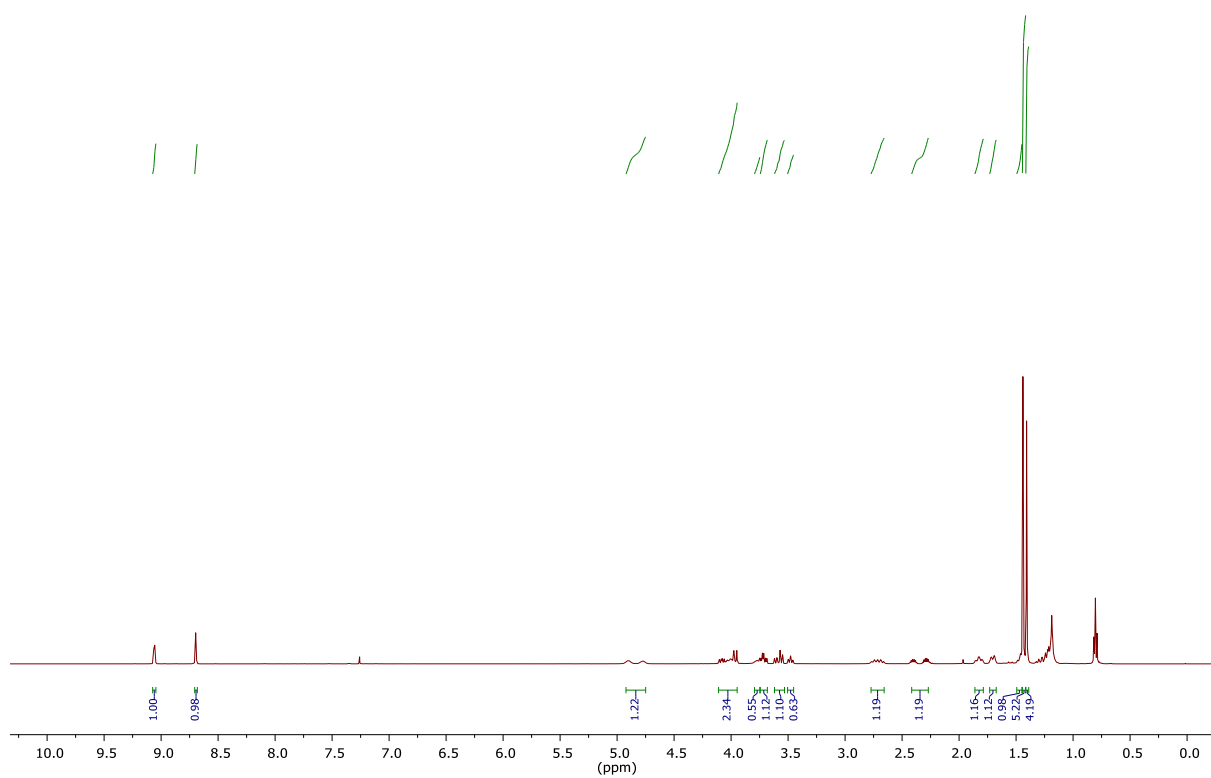

Figure S29A  $^1\text{H-NMR}$  (400 MHz) of **26b** in  $\text{CDCl}_3$ .

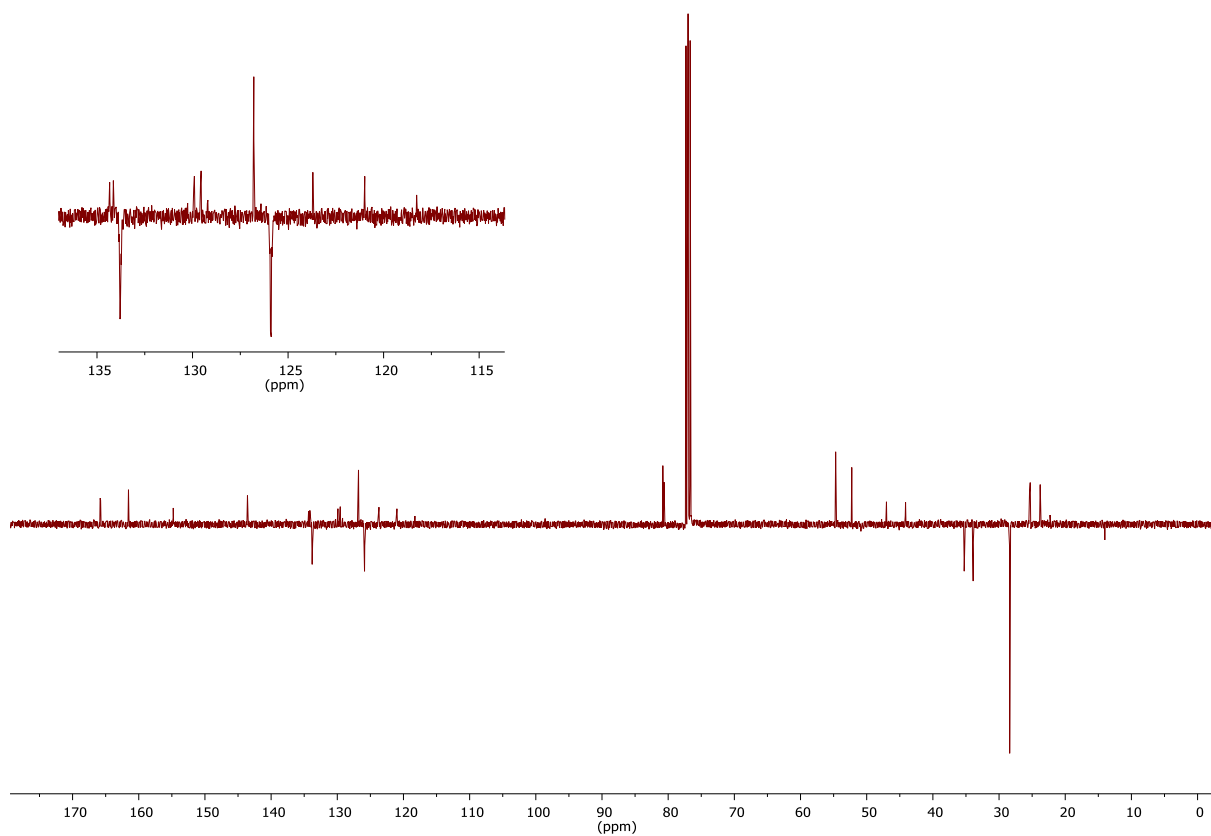

Figure S29B  $^{13}\text{C-APT-NMR}$  (100 MHz) of **26b** in  $\text{CDCl}_3$ .

Sample Information

Sample Name :  
 Tray# : 1  
 Vial# : 5  
 Injection Volume : 5  
 Data File : AR190.lcd  
 Method File : MSP5-95\_30min\_1.0.lcm  
 Batch File : Batch170521\_2.lcb  
 Report Format File : Reportformat1.lsr  
 Date Acquired : 17.05.2021 15:22:28  
 Date Processed : 17.05.2021 15:52:31

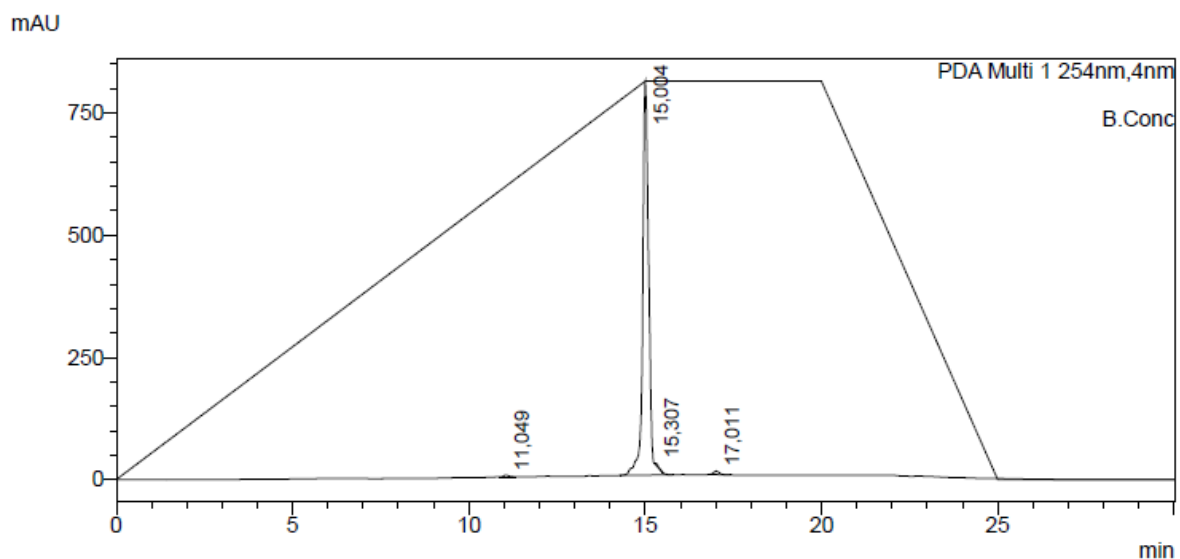

PDA Ch1 254nm

| Peak# | Ret. Time | Area    | Height | Area%   |
|-------|-----------|---------|--------|---------|
| 1     | 11,049    | 36949   | 3284   | 0,380   |
| 2     | 15,004    | 9576331 | 806130 | 98,579  |
| 3     | 15,307    | 21170   | 4165   | 0,218   |
| 4     | 17,011    | 79911   | 7314   | 0,823   |
| Total |           | 9714361 | 820894 | 100,000 |

Figure S29C HPLC chromatogram of **26b**.

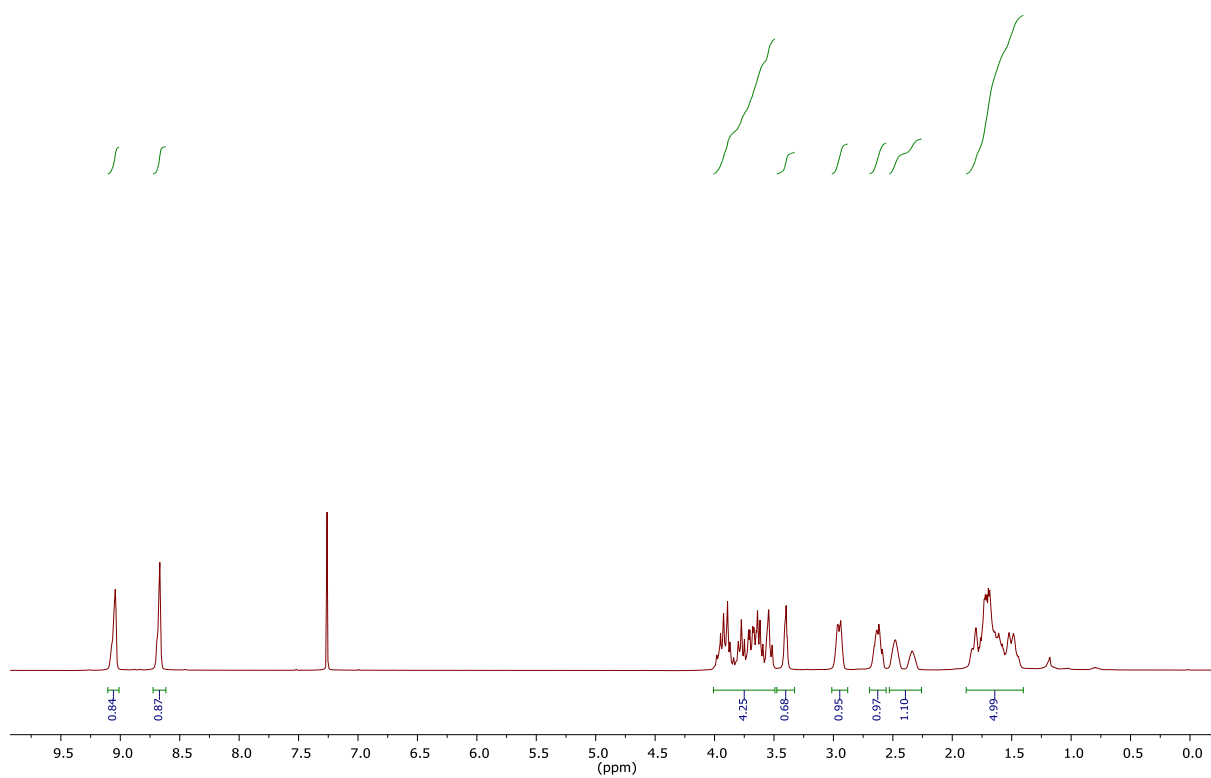

Figure S30A  $^1\text{H-NMR}$  (400 MHz) of **26c** in  $\text{CDCl}_3$ .

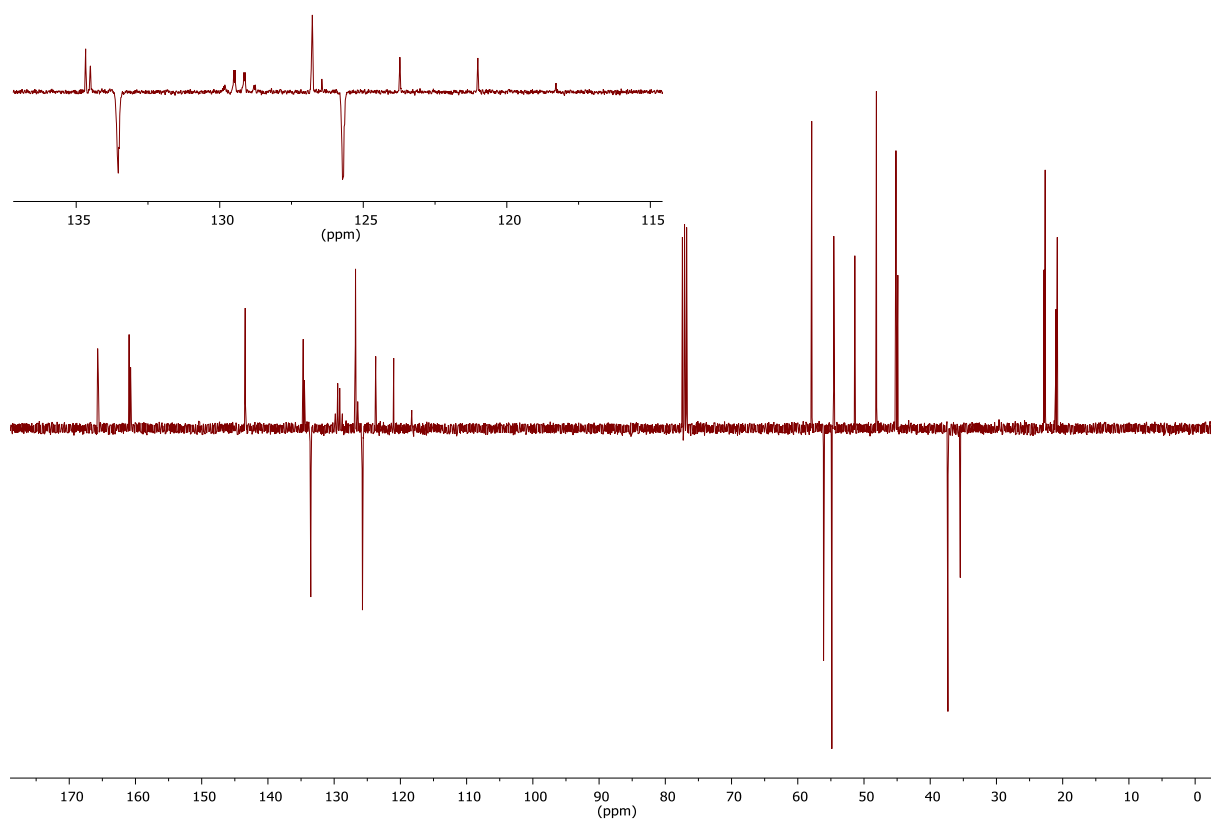

Figure S30B  $^{13}\text{C-APT-NMR}$  (100 MHz) of **26c** in  $\text{CDCl}_3$ .

Sample Information

Sample Name :  
 Tray# : 0  
 Vial# : 4  
 Injection Volume : 20  
 Data File : AR 191\_070621.lcd  
 Method File : MSP5-95\_30min\_1.0.lcm  
 Batch File : Batch070621\_1.lcb  
 Report Format File : Reportformat1.lsr  
 Date Acquired : 07.06.2021 09:28:34  
 Date Processed : 07.06.2021 09:58:36

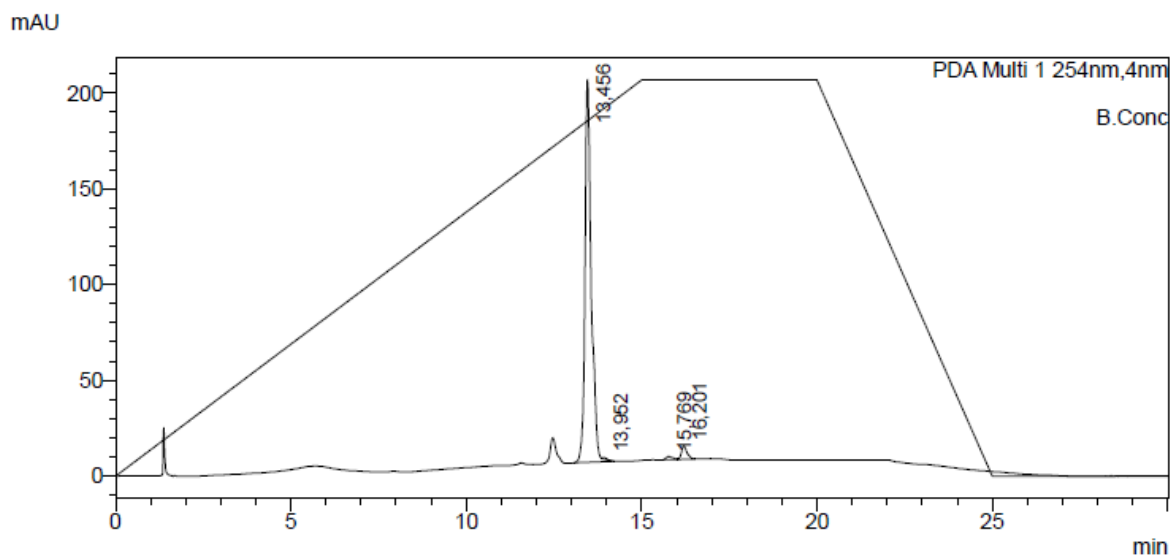

PDA Ch1 254nm

| Peak# | Ret. Time | Area    | Height | Area%   |
|-------|-----------|---------|--------|---------|
| 1     | 13,456    | 2502547 | 199602 | 95,972  |
| 2     | 13,952    | 3977    | 625    | 0,153   |
| 3     | 15,769    | 22872   | 1775   | 0,877   |
| 4     | 16,201    | 78176   | 6989   | 2,998   |
| Total |           | 2607572 | 208990 | 100,000 |

Figure S30C HPLC chromatogram of **26c**.

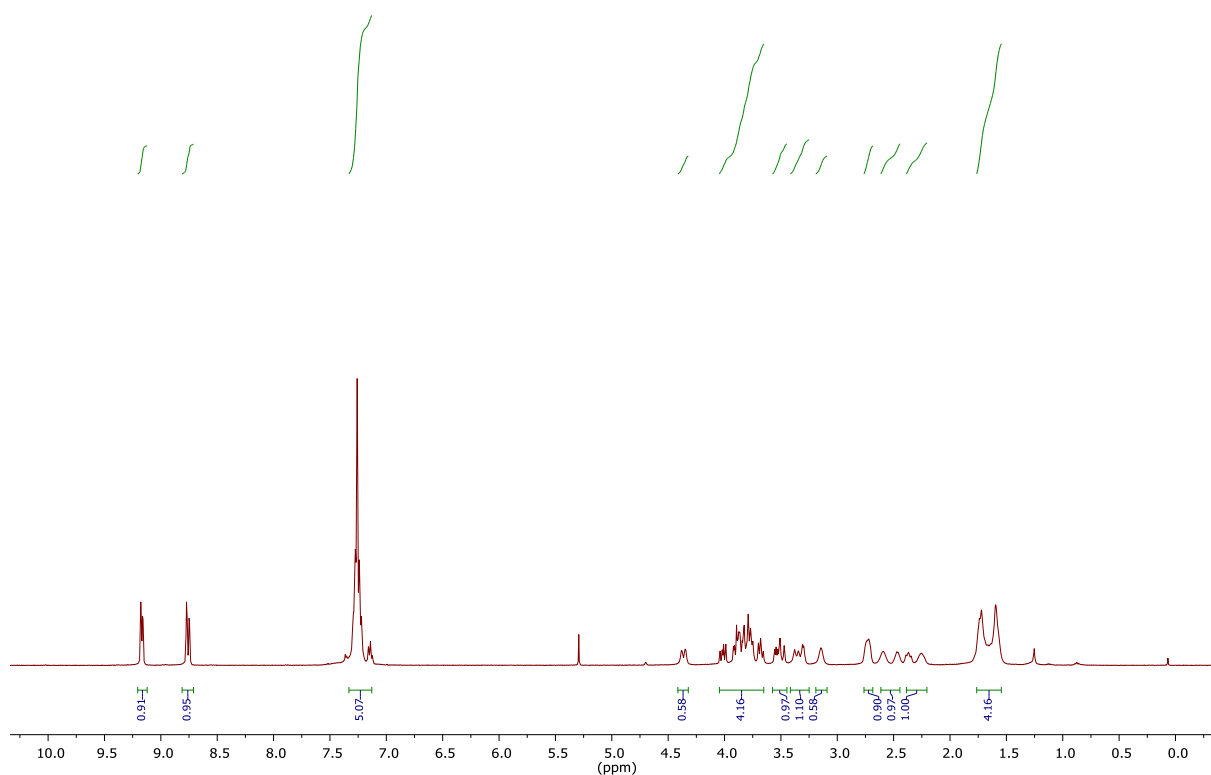

Figure S31A  $^1\text{H-NMR}$  (400 MHz) of **26d** in  $\text{CDCl}_3$ .

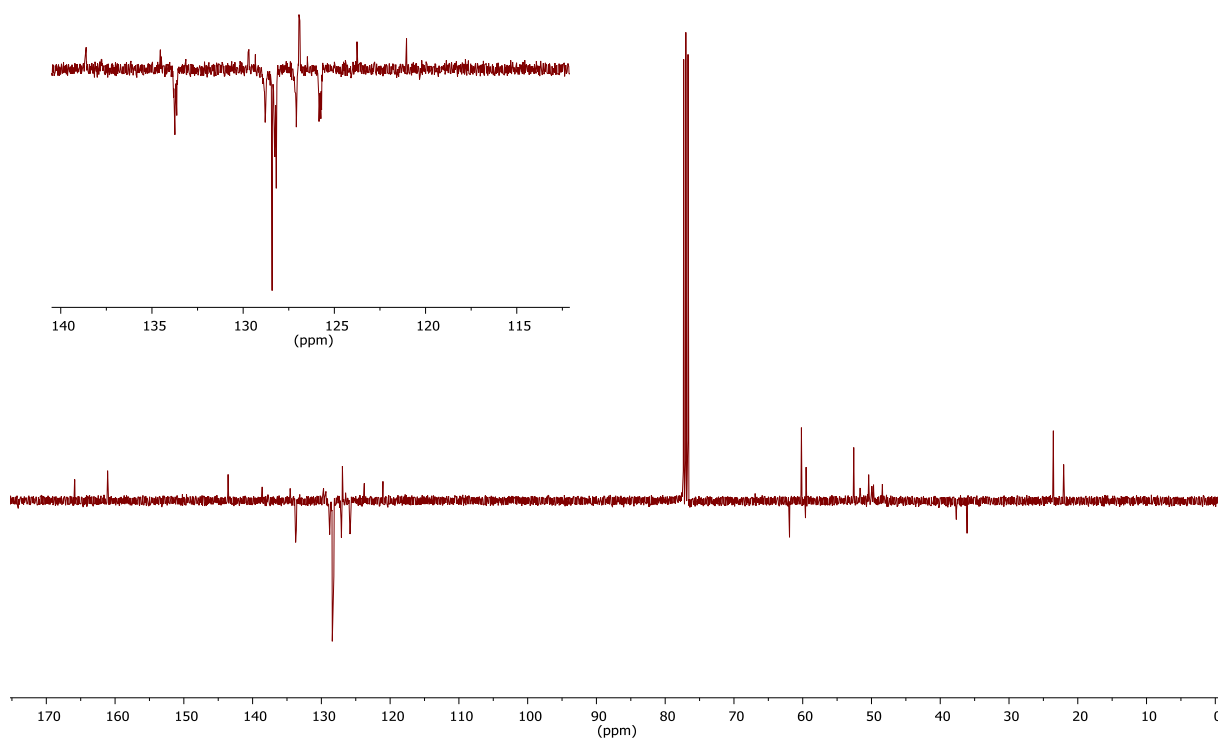

Figure S31B  $^{13}\text{C-APT-NMR}$  (100 MHz) of **26d** in  $\text{CDCl}_3$ .



Sample Information

Sample Name :  
 Tray# : 0  
 Vial# : 1  
 Injection Volume : 20  
 Data File : AR 194.lcd  
 Method File : MSP5-95\_30min\_1.0.lcm  
 Batch File : Batch040621\_2.lcb  
 Report Format File : Reportformat1.lsr  
 Date Acquired : 04.06.2021 09:10:43  
 Date Processed : 04.06.2021 09:40:44

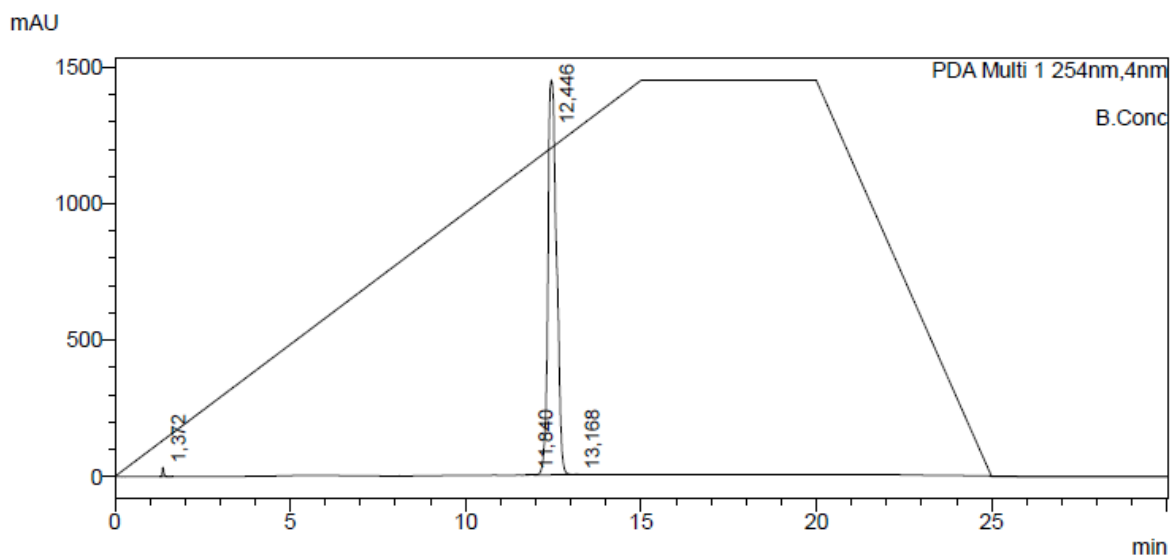

PDA Ch1 254nm

| Peak# | Ret. Time | Area     | Height  | Area%   |
|-------|-----------|----------|---------|---------|
| 1     | 1,372     | 103147   | 32228   | 0,415   |
| 2     | 11,840    | 12083    | 1204    | 0,049   |
| 3     | 12,446    | 24748293 | 1446069 | 99,510  |
| 4     | 13,168    | 6698     | 894     | 0,027   |
| Total |           | 24870220 | 1480395 | 100,000 |

Figure S31C HPLC trace of **26d**.

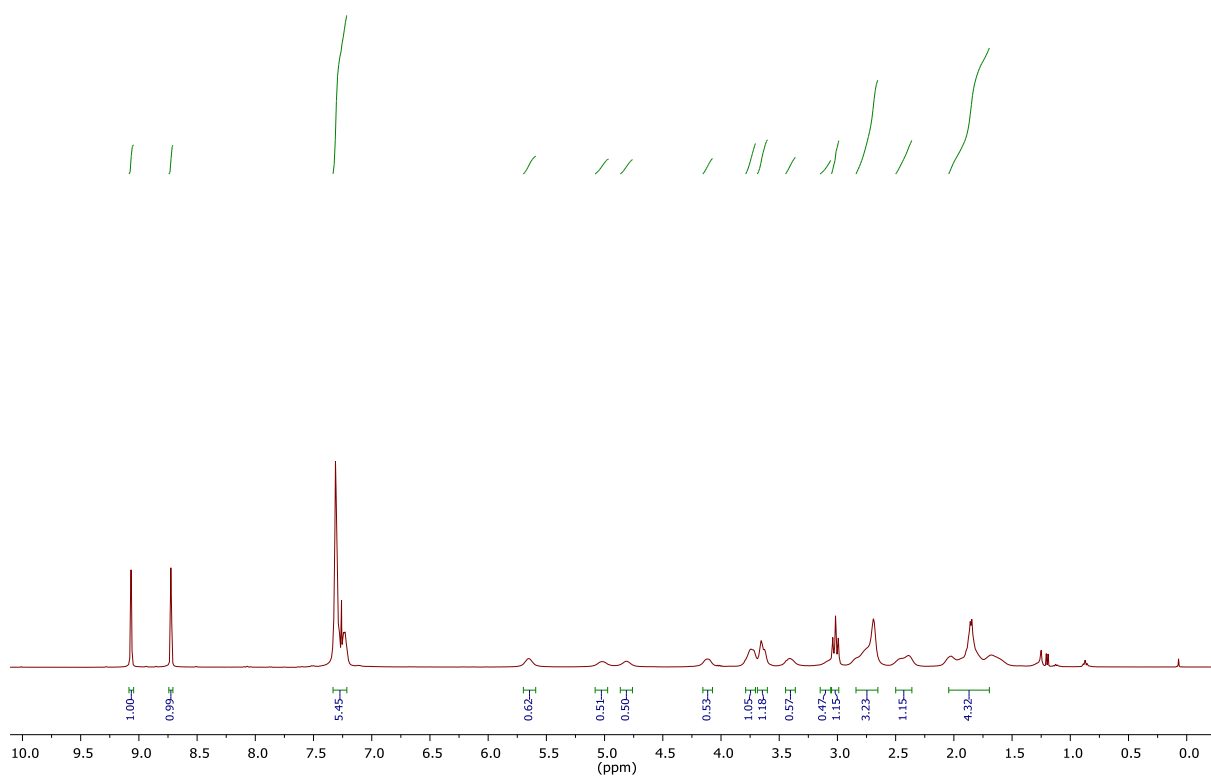

Figure S32A  $^1\text{H-NMR}$  (400 MHz) of **27b** in  $\text{CDCl}_3$ .

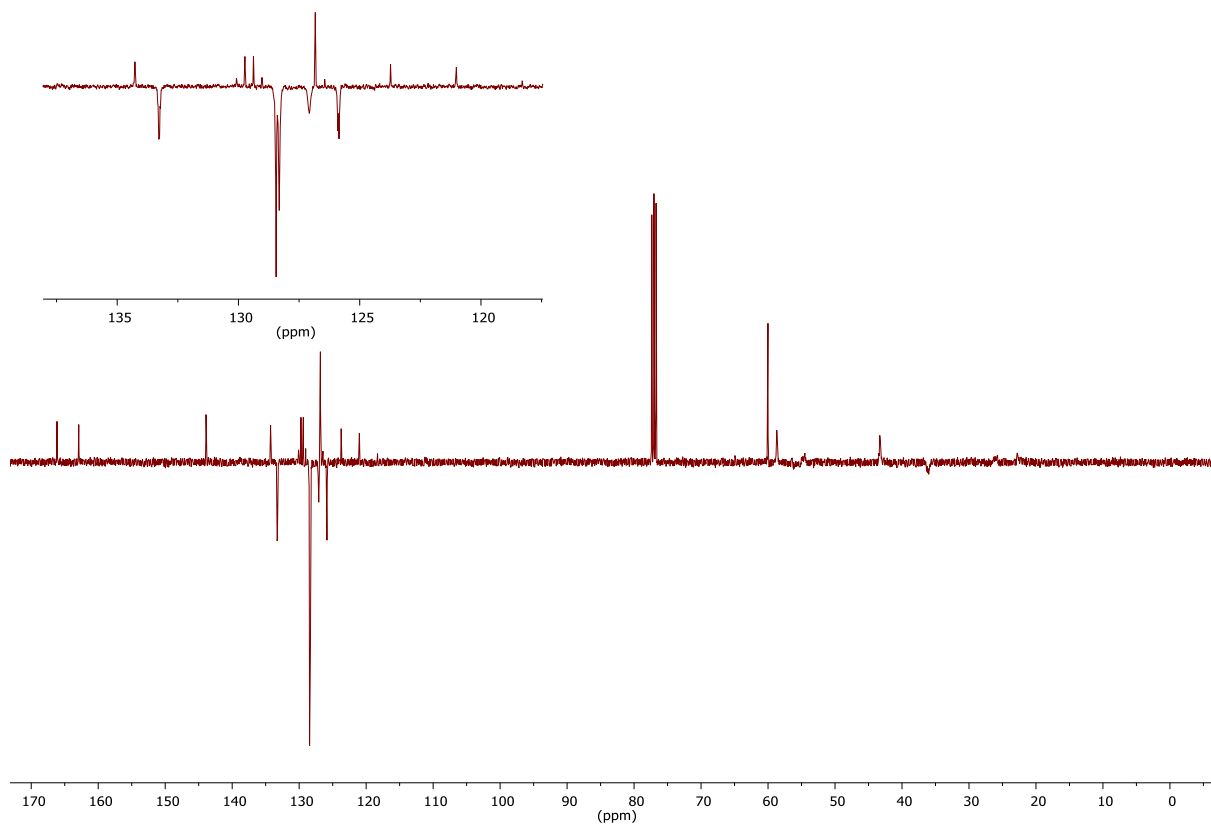

Figure S32B  $^{13}\text{C-APT-NMR}$  (125 MHz) of **27b** in  $\text{CDCl}_3$ .

Sample Information

Sample Name :  
 Tray# : 0  
 Vial# : 5  
 Injection Volume : 20  
 Data File : AR\_192\_070621.lcd  
 Method File : MSP5-95\_30min\_1.0.lcm  
 Batch File : Batch070621\_1.lcb  
 Report Format File : Reportformat1.lsr  
 Date Acquired : 07.06.2021 09:59:06  
 Date Processed : 07.06.2021 10:29:08

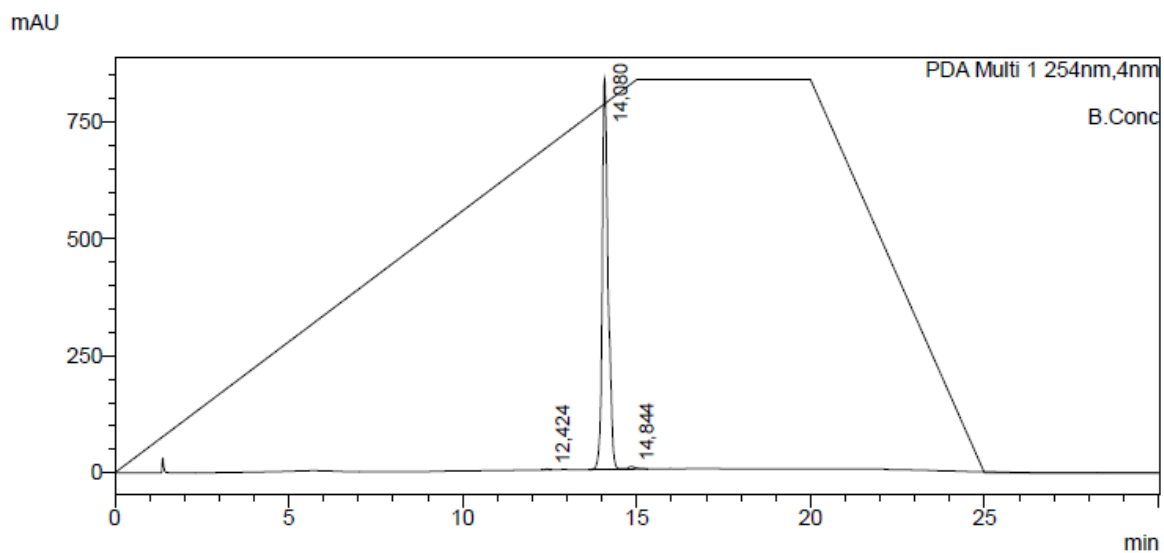

PDA Ch1 254nm

| Peak# | Ret. Time | Area    | Height | Area%   |
|-------|-----------|---------|--------|---------|
| 1     | 12,424    | 10870   | 1365   | 0,110   |
| 2     | 14,080    | 9792401 | 832575 | 99,028  |
| 3     | 14,844    | 85240   | 5657   | 0,862   |
| Total |           | 9888511 | 839596 | 100,000 |

Figure S32C HPLC chromatogram of **27b**.

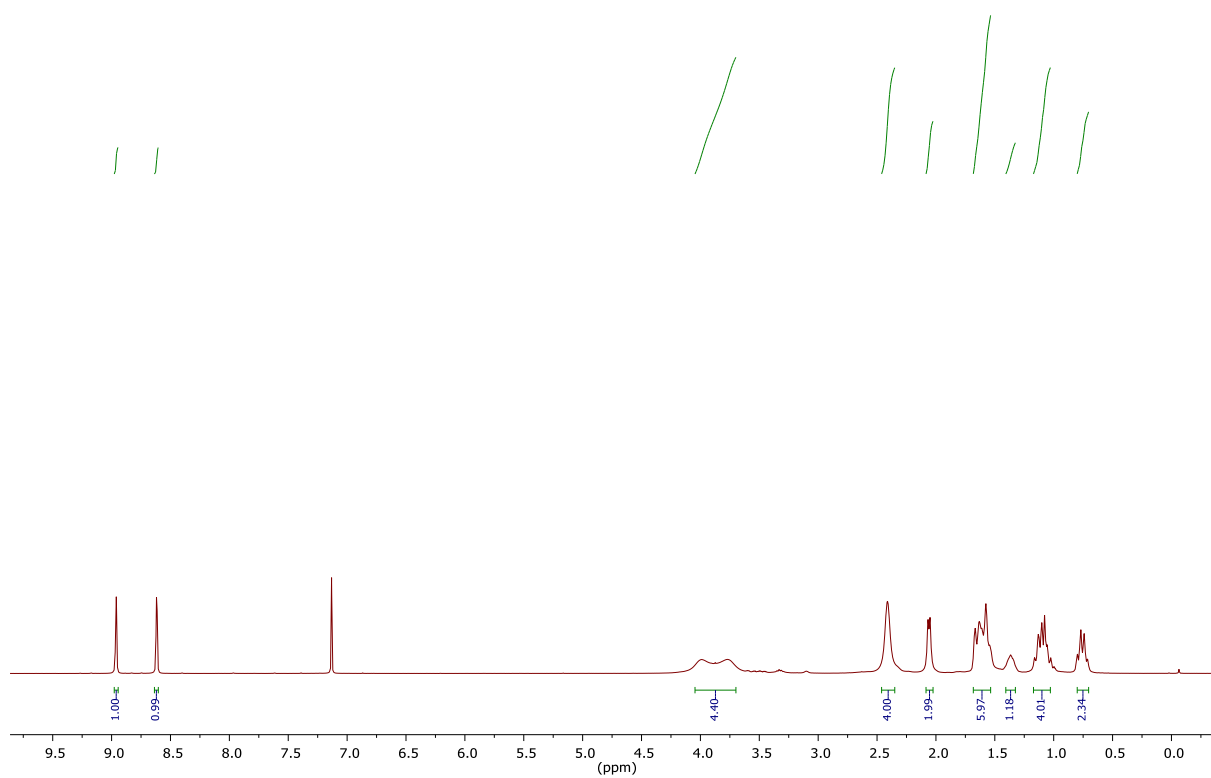

Figure S33A  $^1\text{H-NMR}$  (400 MHz) of macozinone in  $\text{CDCl}_3$ .

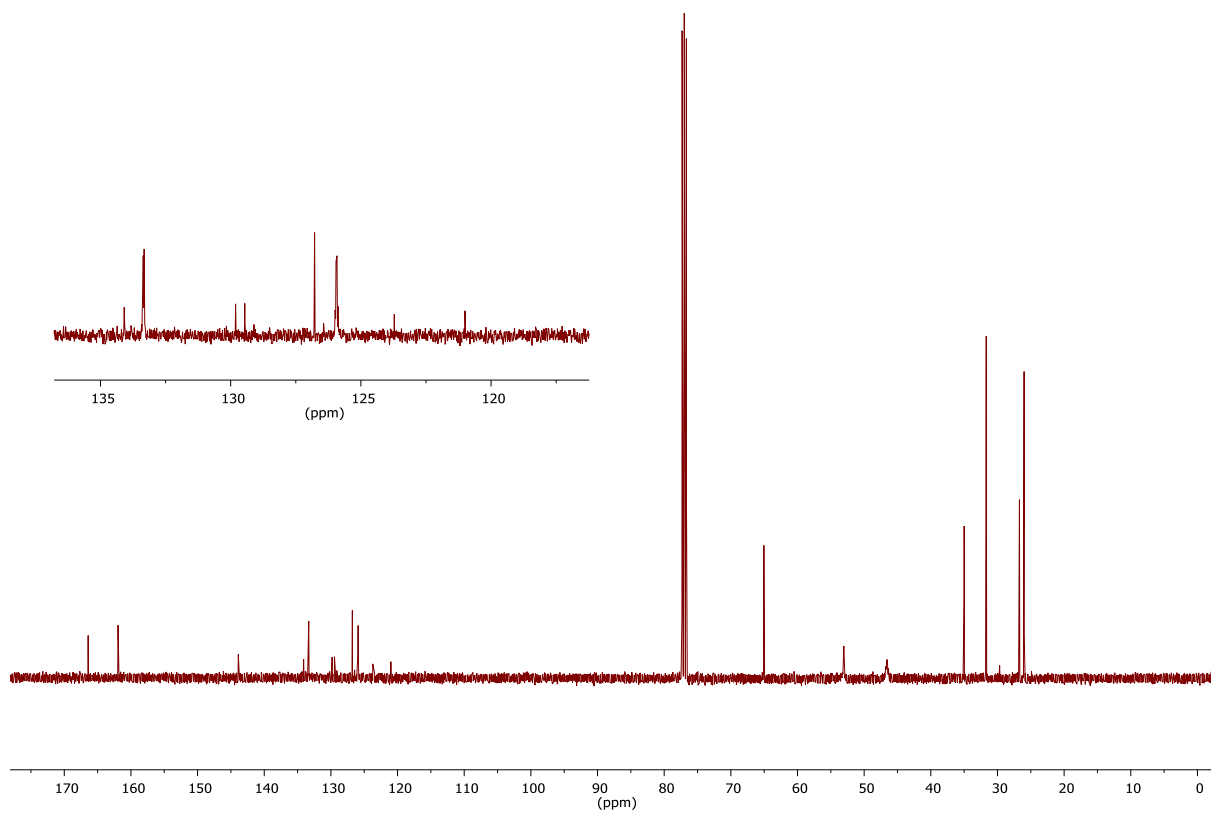

Figure S33B  $^{13}\text{C-NMR}$  (100 MHz) of macozinone in  $\text{CDCl}_3$ .

Sample Information

Sample Name :  
 Tray# : 1  
 Vial# : 40  
 Injection Volume : 5  
 Data File : macozinone.lcd  
 Method File : MSP5-95\_30min\_1.0.lcm  
 Batch File : Batch170521\_2.lcb  
 Report Format File : Reportformat1.lsr  
 Date Acquired : 18.05.2021 09:10:57  
 Date Processed : 18.05.2021 09:41:00

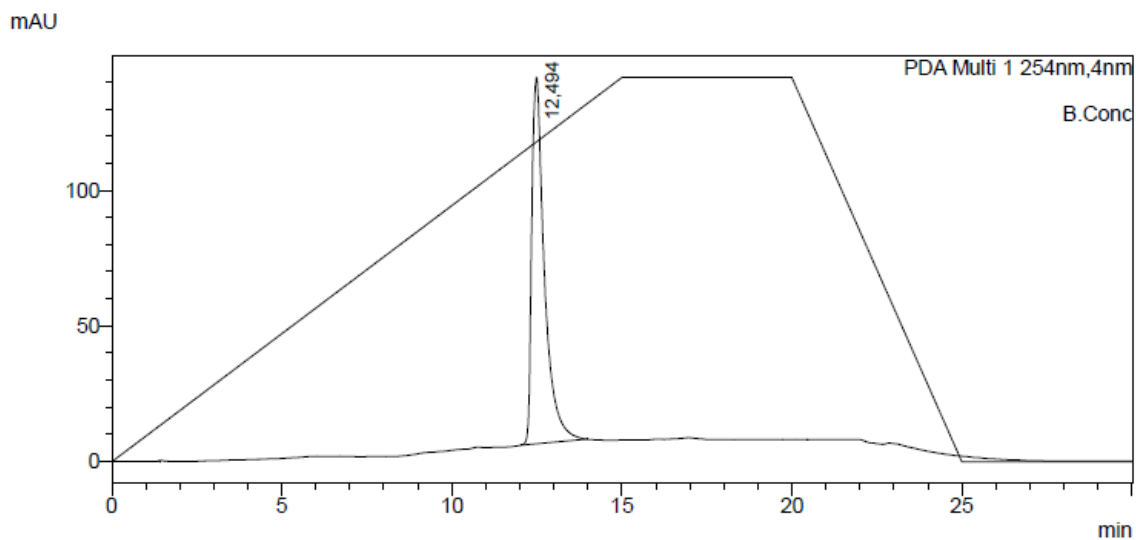

PDA Ch1 254nm

| Peak# | Ret. Time | Area    | Height | Area%   |
|-------|-----------|---------|--------|---------|
| 1     | 12,494    | 3525842 | 135066 | 100,000 |
| Total |           | 3525842 | 135066 | 100,000 |

Figure S33C HPLC trace of *macozinone*.

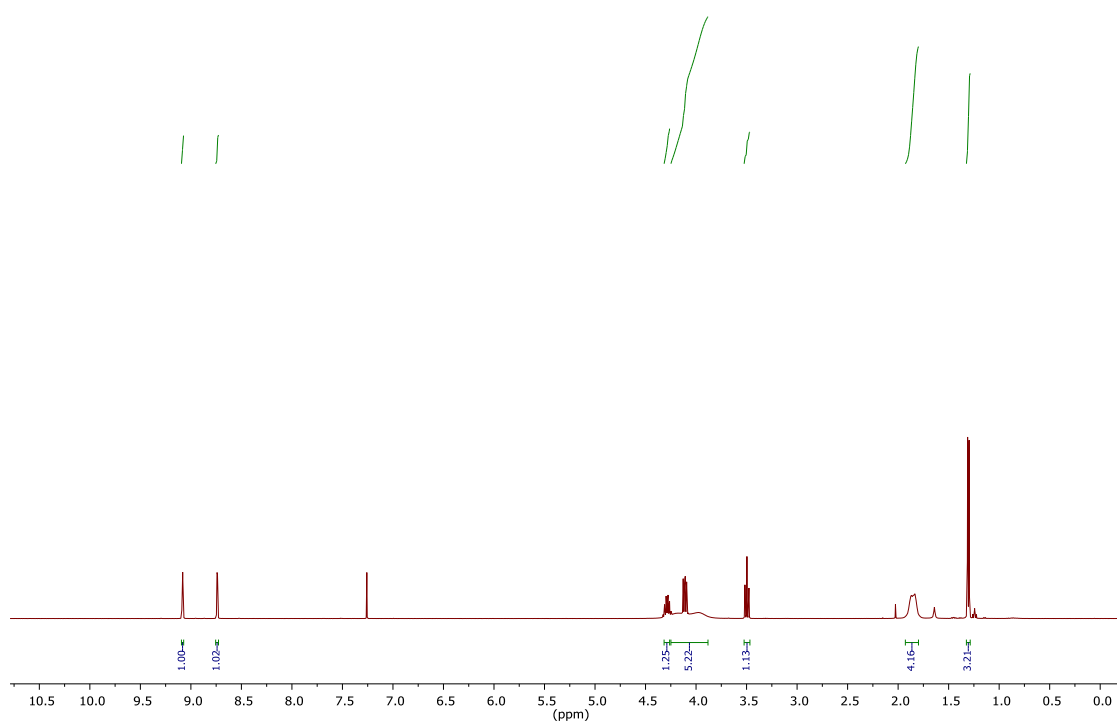

Figure S34A  $^1\text{H-NMR}$  (400 MHz) of **BTZ043** in  $\text{CDCl}_3$ .

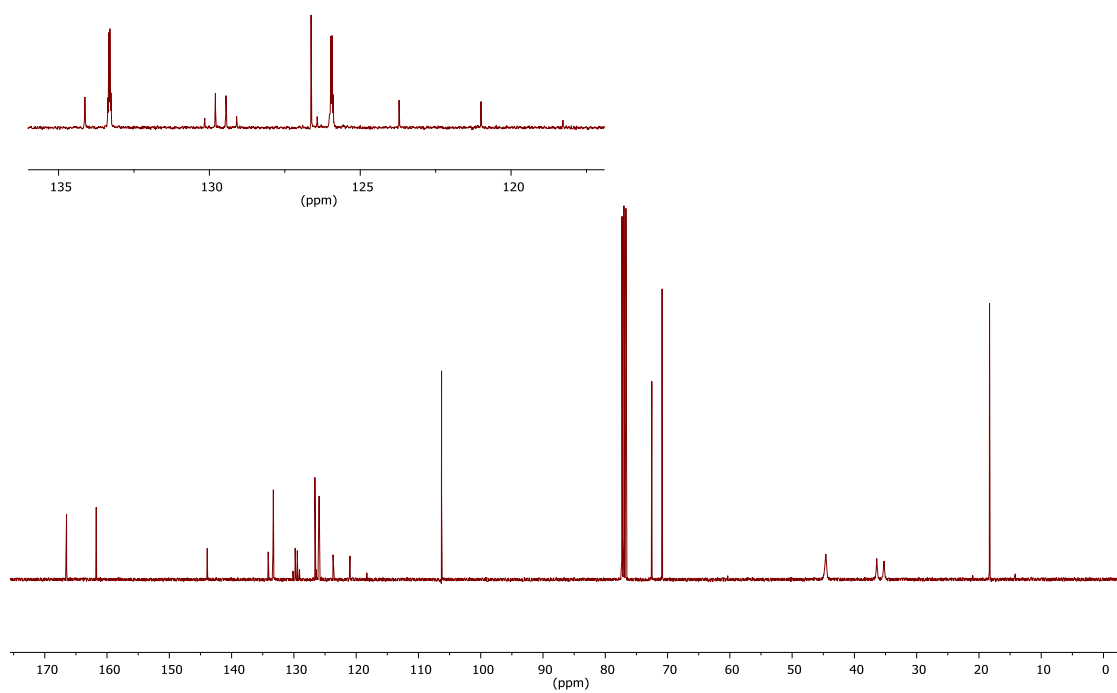

Figure S34B  $^{13}\text{C-NMR}$  (100 MHz) of **BTZ043** in  $\text{CDCl}_3$ .

Sample Information

Sample Name :  
 Tray# : 1  
 Vial# : 39  
 Injection Volume : 5  
 Data File : BTZ043.lcd  
 Method File : MSP5-95\_30min\_1.0.lcm  
 Batch File : Batch170521\_2.lcb  
 Report Format File : Reportformat1.lsr  
 Date Acquired : 18.05.2021 08:40:24  
 Date Processed : 18.05.2021 09:10:28

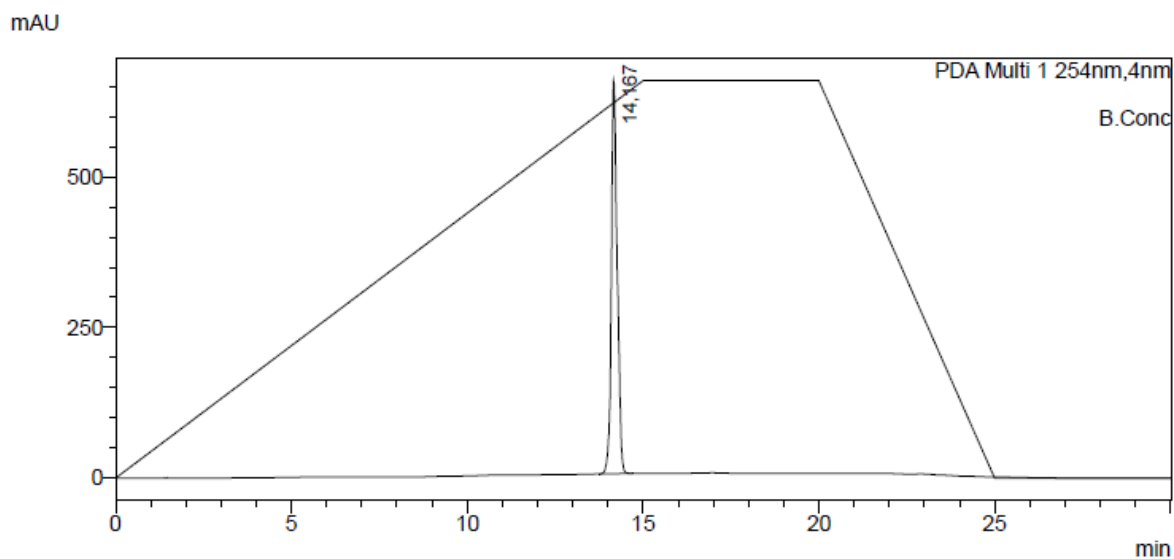

PDA Ch1 254nm

| Peak# | Ret. Time | Area    | Height | Area%   |
|-------|-----------|---------|--------|---------|
| 1     | 14,167    | 7587509 | 652404 | 100,000 |
| Total |           | 7587509 | 652404 | 100,000 |

Figure S34C HPLC trace of **BTZ043**.

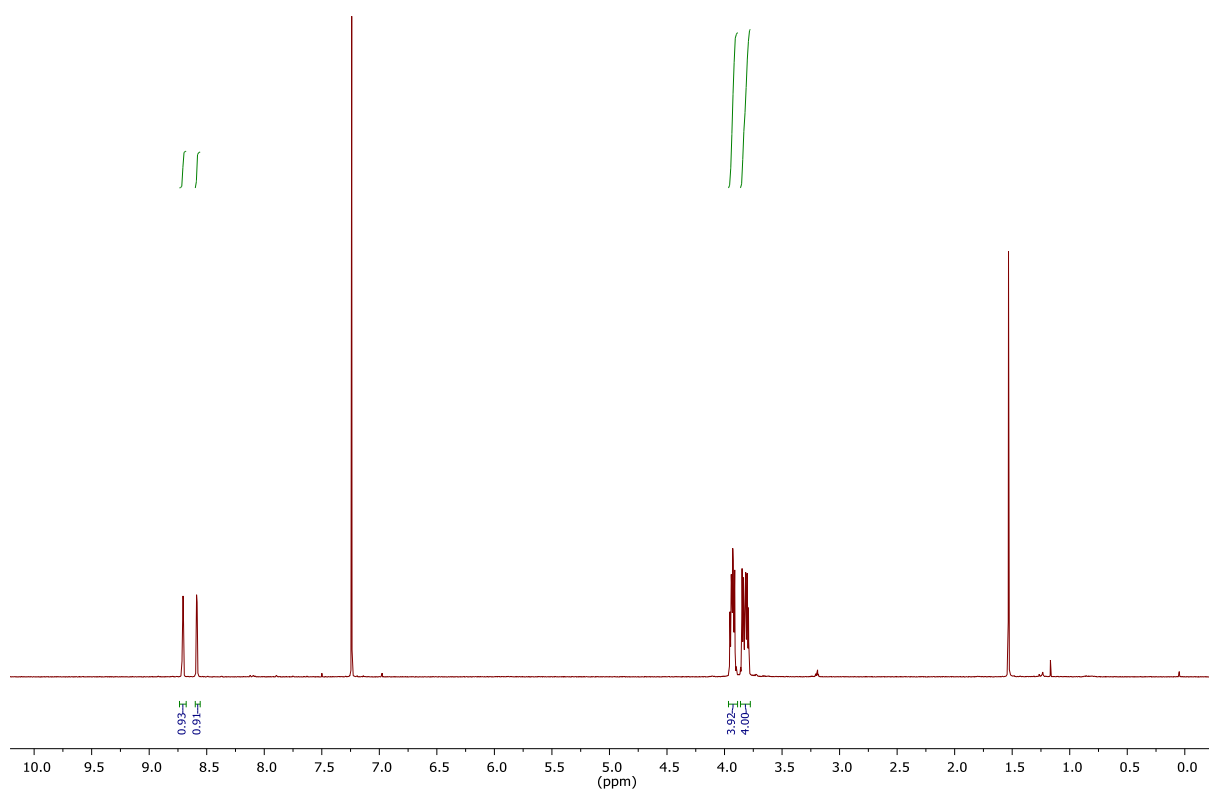

Figure S35A  $^1\text{H-NMR}$  (400 MHz) of **30b** in  $\text{CDCl}_3$ .

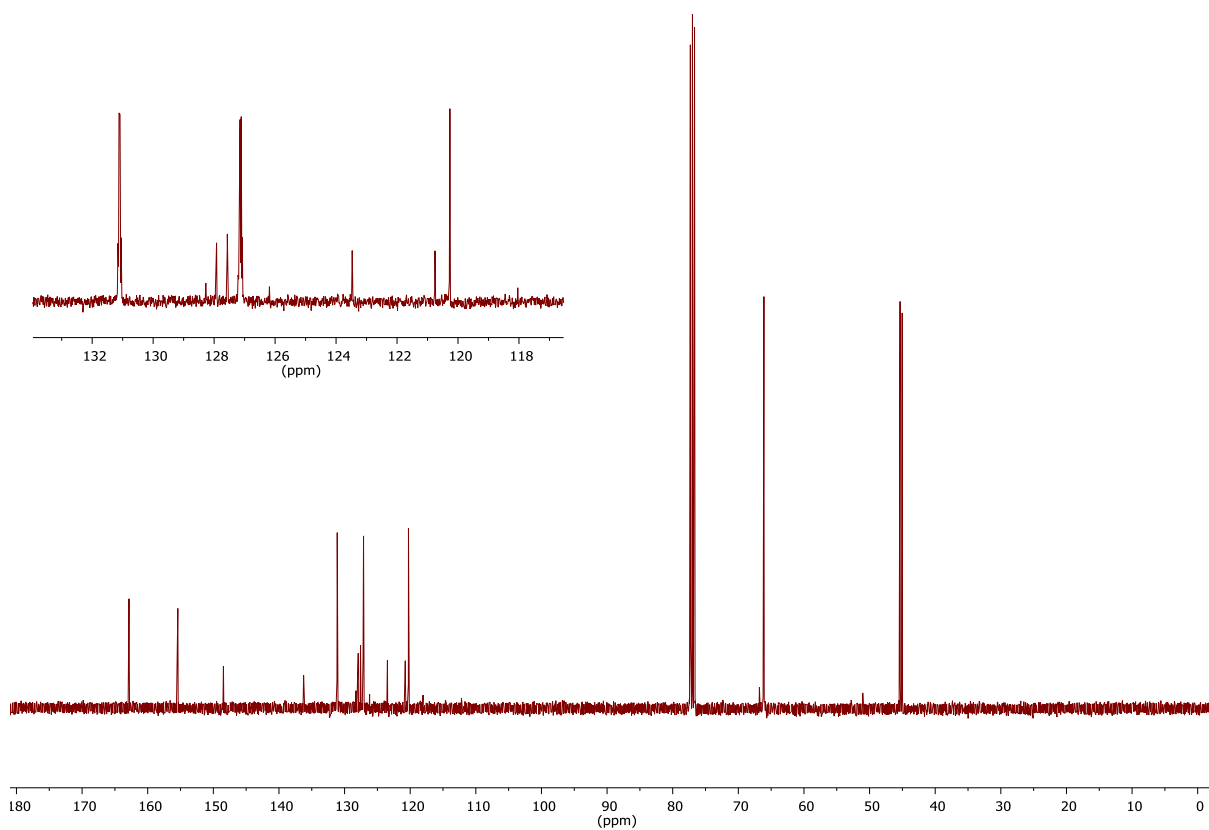

Figure S35B  $^{13}\text{C-NMR}$  (100 MHz) of **30b** in  $\text{CDCl}_3$ .



Sample Information

Sample Name :  
 Tray# : 1  
 Vial# : 39  
 Injection Volume : 5  
 Data File : BTZ043.lcd  
 Method File : MSP5-95\_30min\_1.0.lcm  
 Batch File : Batch170521\_2.lcb  
 Report Format File : Reportformat1.lsr  
 Date Acquired : 18.05.2021 08:40:24  
 Date Processed : 18.05.2021 09:10:28

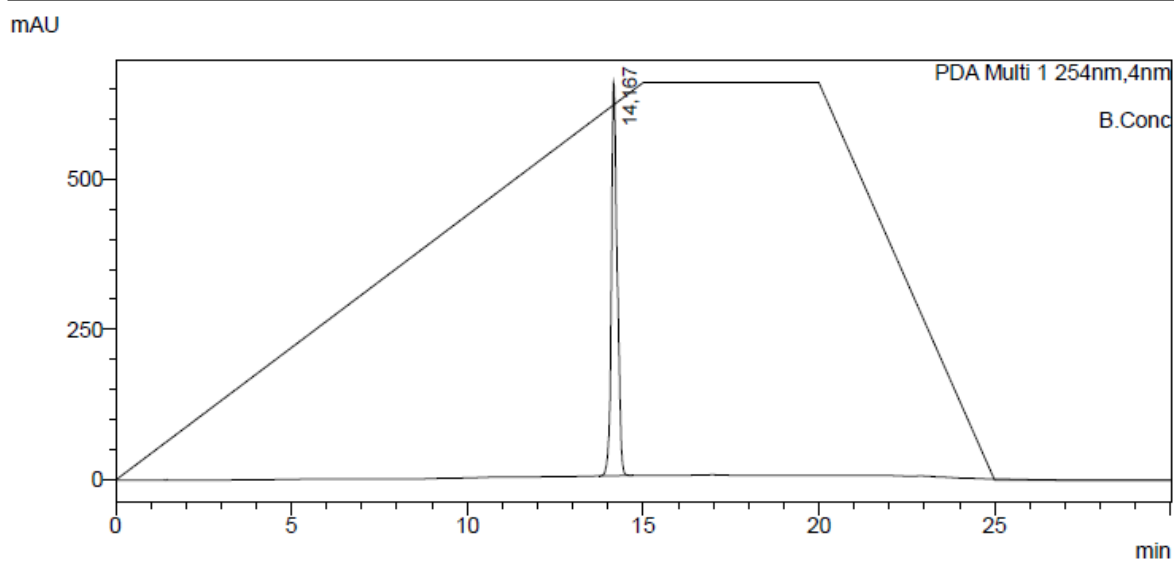

PDA Ch1 254nm

| Peak# | Ret. Time | Area    | Height | Area%   |
|-------|-----------|---------|--------|---------|
| 1     | 14,167    | 7587509 | 652404 | 100,000 |
| Total |           | 7587509 | 652404 | 100,000 |

Figure S35C HPLC chromatogram of **30b**.

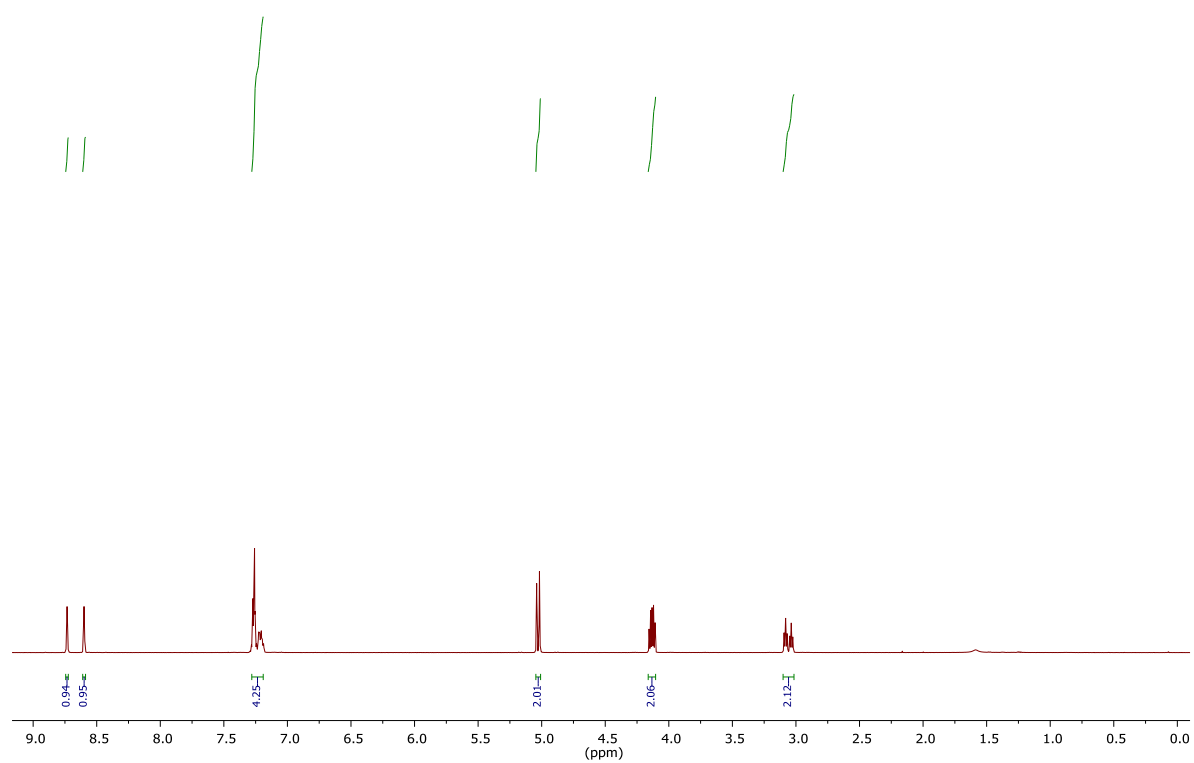

Figure S36A  $^1\text{H-NMR}$  (400 MHz) of **31b** in  $\text{CDCl}_3$ .

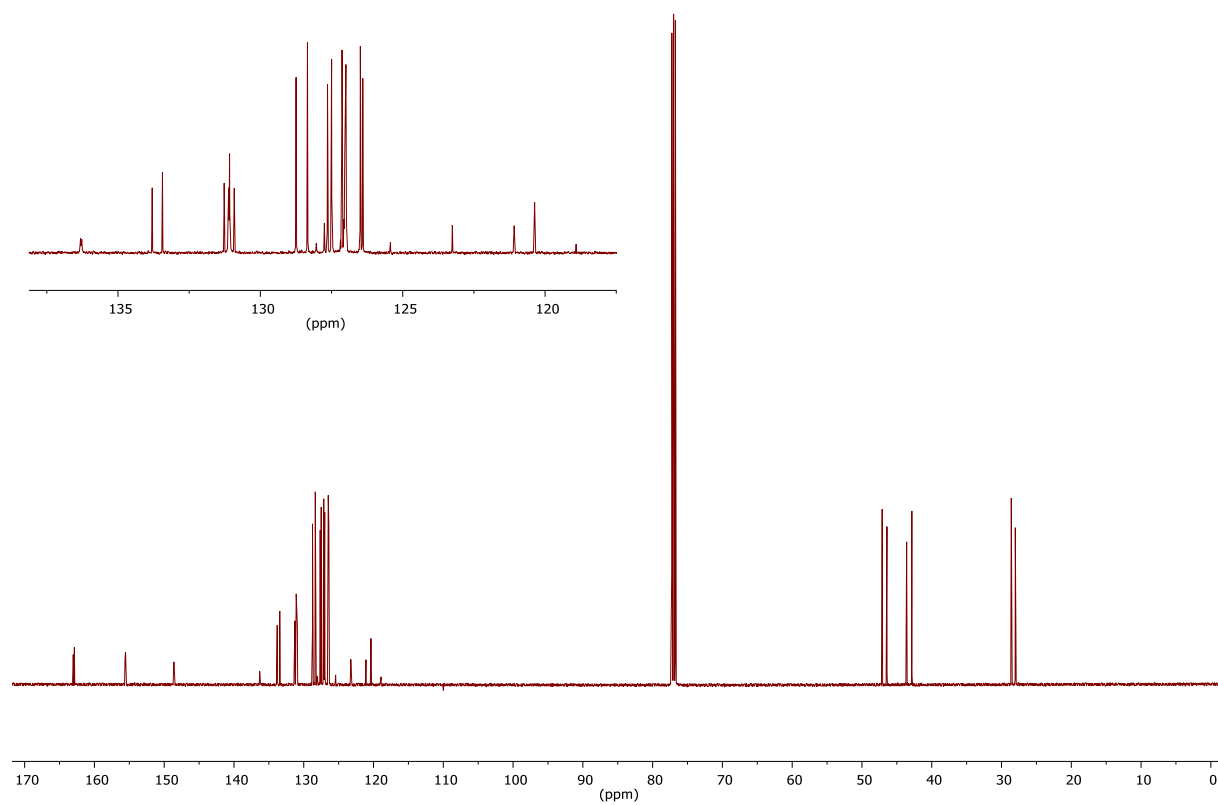

Figure S36B  $^{13}\text{C-NMR}$  (100 MHz) of **31b** in  $\text{CDCl}_3$ .

Sample Information

Sample Name :  
 Tray# : 1  
 Vial# : 8  
 Injection Volume : 5  
 Data File : AR125.lcd  
 Method File : MSP5-95\_30min\_1.0.lcm  
 Batch File : Batch170521\_2.lcb  
 Report Format File : Reportformat1.lsr  
 Date Acquired : 17.05.2021 16:54:03  
 Date Processed : 17.05.2021 17:24:05

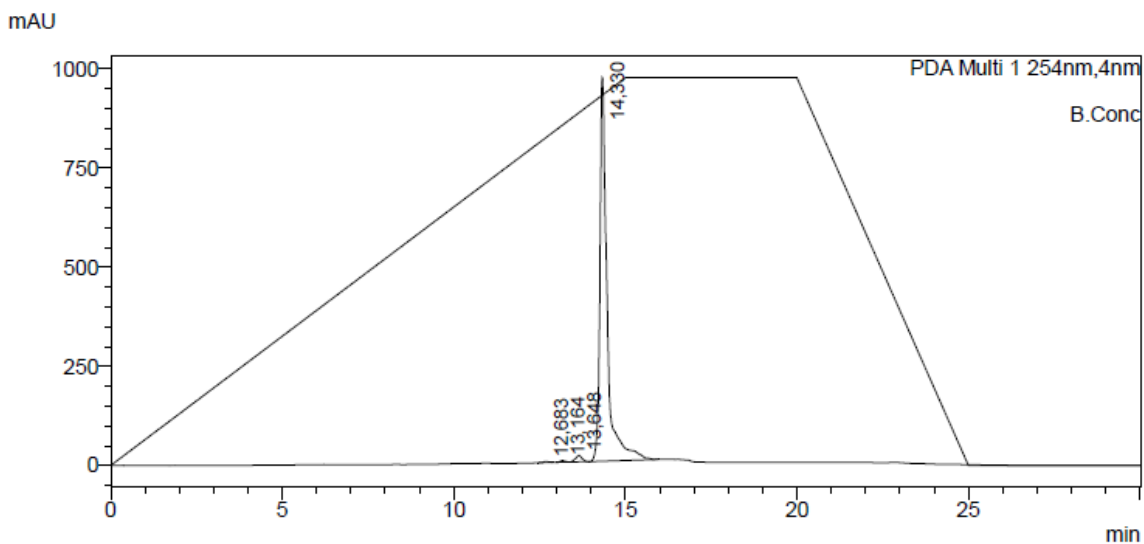

PDA Ch1 254nm

| Peak# | Ret. Time | Area     | Height | Area%   |
|-------|-----------|----------|--------|---------|
| 1     | 12,683    | 21919    | 2130   | 0,151   |
| 2     | 13,164    | 36265    | 3754   | 0,250   |
| 3     | 13,648    | 216198   | 16547  | 1,490   |
| 4     | 14,330    | 14238048 | 967103 | 98,109  |
| Total |           | 14512430 | 989534 | 100,000 |

Figure S36C HPLC trace of **31b**.

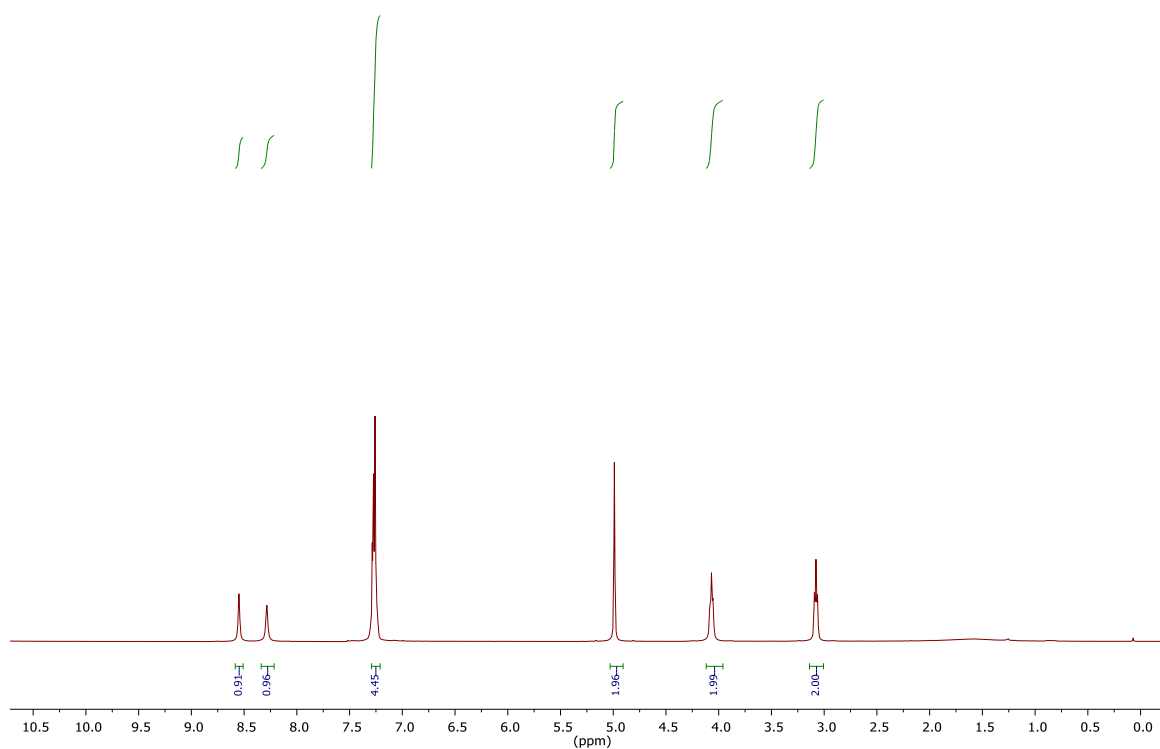

Figure S37A  $^1\text{H-NMR}$  (400 MHz) of **32a** in  $\text{CDCl}_3$ .

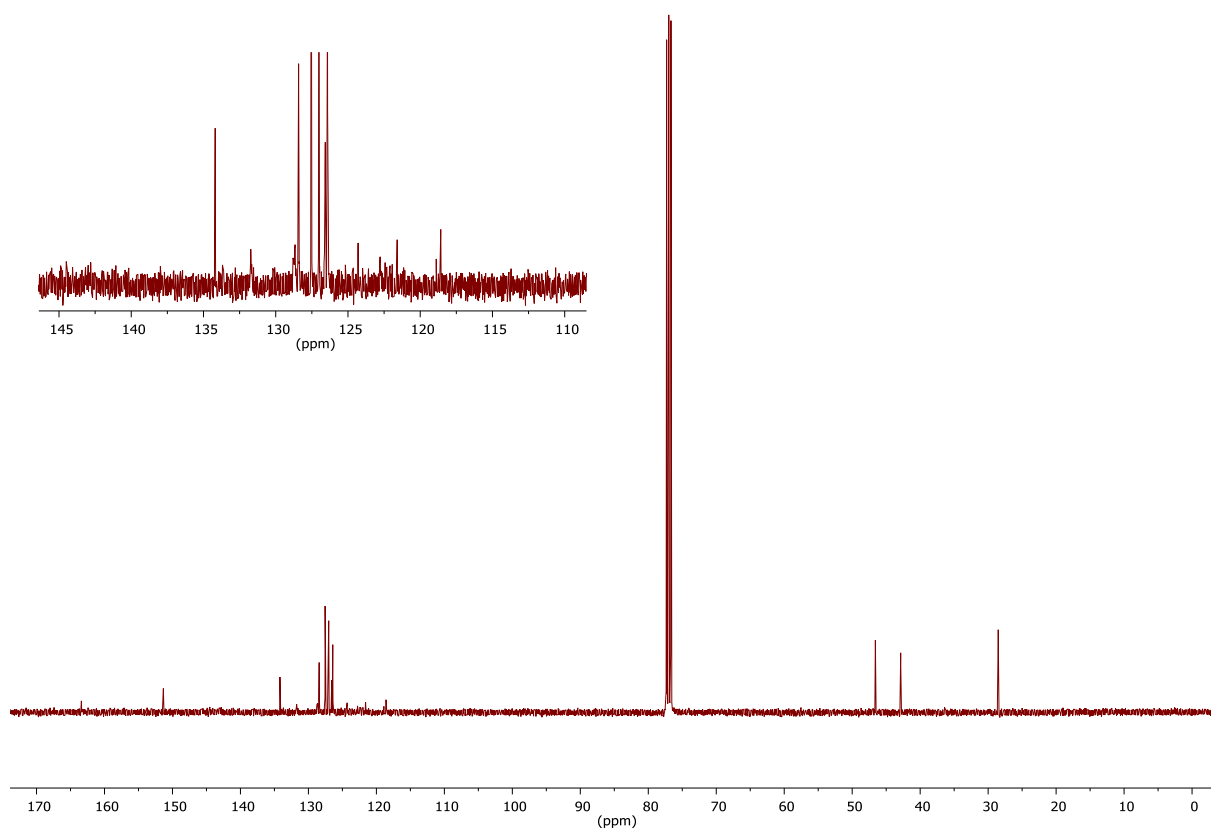

Figure S37B  $^{13}\text{C-NMR}$  (100 MHz) of **32a** in  $\text{CDCl}_3$ .

Sample Information

Sample Name :  
 Tray# : 1  
 Vial# : 18  
 Injection Volume : 5  
 Data File : AR199.lcd  
 Method File : MSP5-95\_30min\_1.0.lcm  
 Batch File : Batch170521\_2.lcb  
 Report Format File : Reportformat1.lsr  
 Date Acquired : 17.05.2021 21:59:22  
 Date Processed : 17.05.2021 22:29:24

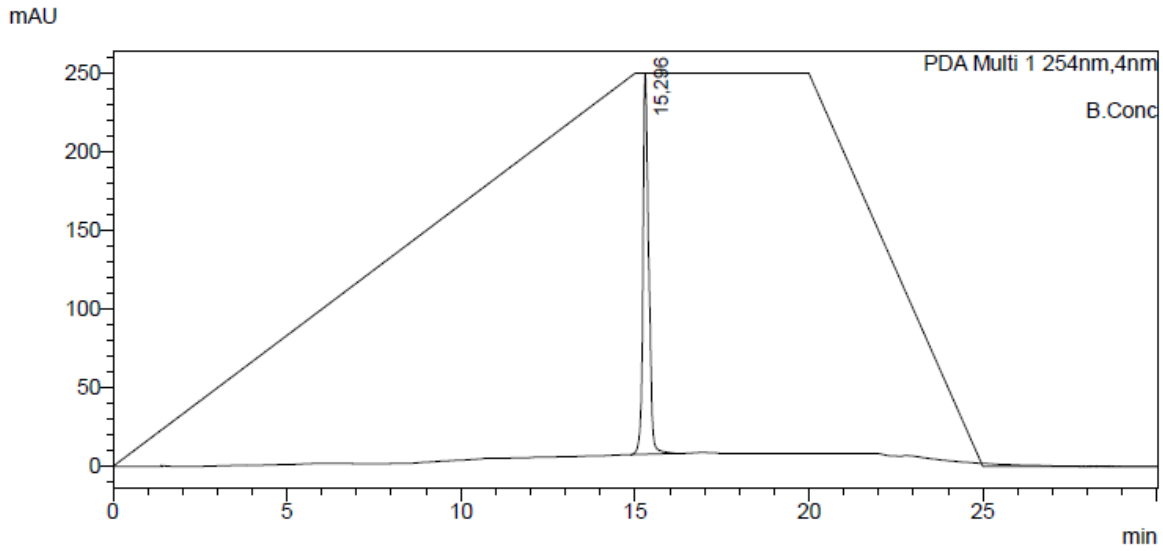

PDA Ch1 254nm

| Peak# | Ret. Time | Area    | Height | Area%   |
|-------|-----------|---------|--------|---------|
| 1     | 15,296    | 2779372 | 242101 | 100,000 |
| Total |           | 2779372 | 242101 | 100,000 |

Figure S37C HPLC chromatogram of **32a**.

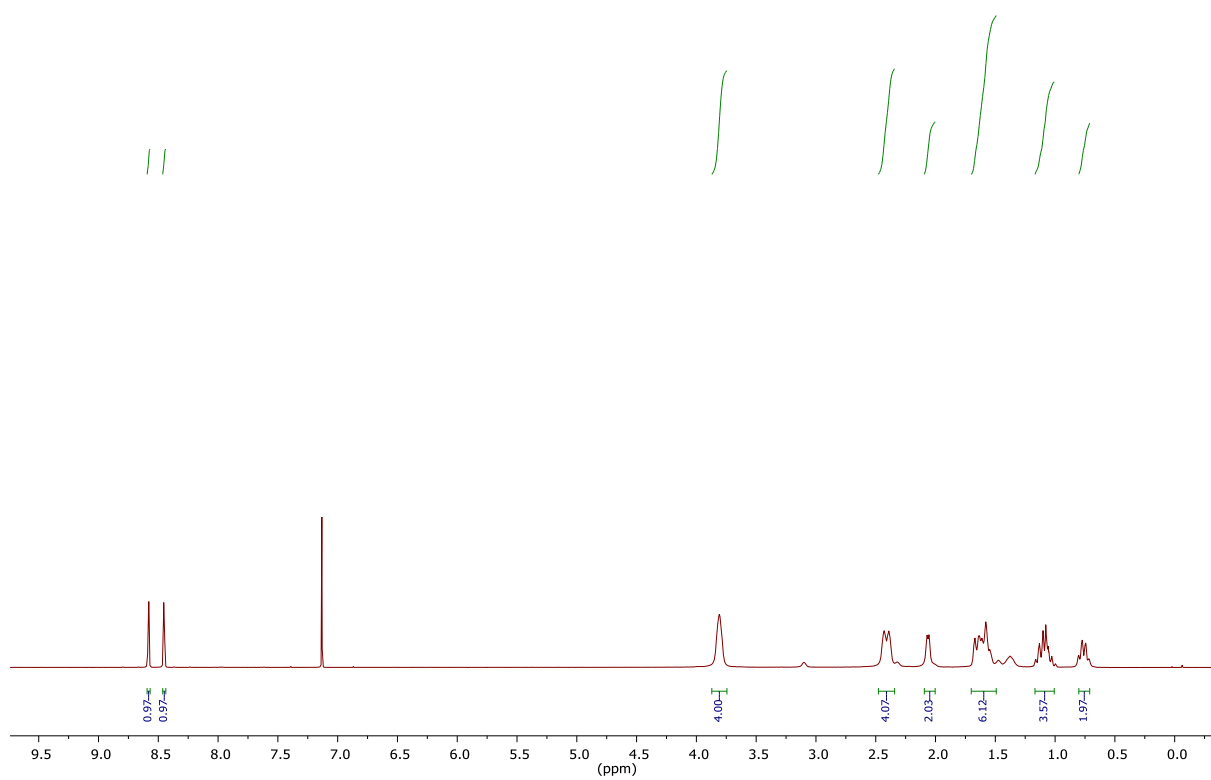

Figure S38A  $^1\text{H-NMR}$  (400 MHz) of **33b** in  $\text{CDCl}_3$ .

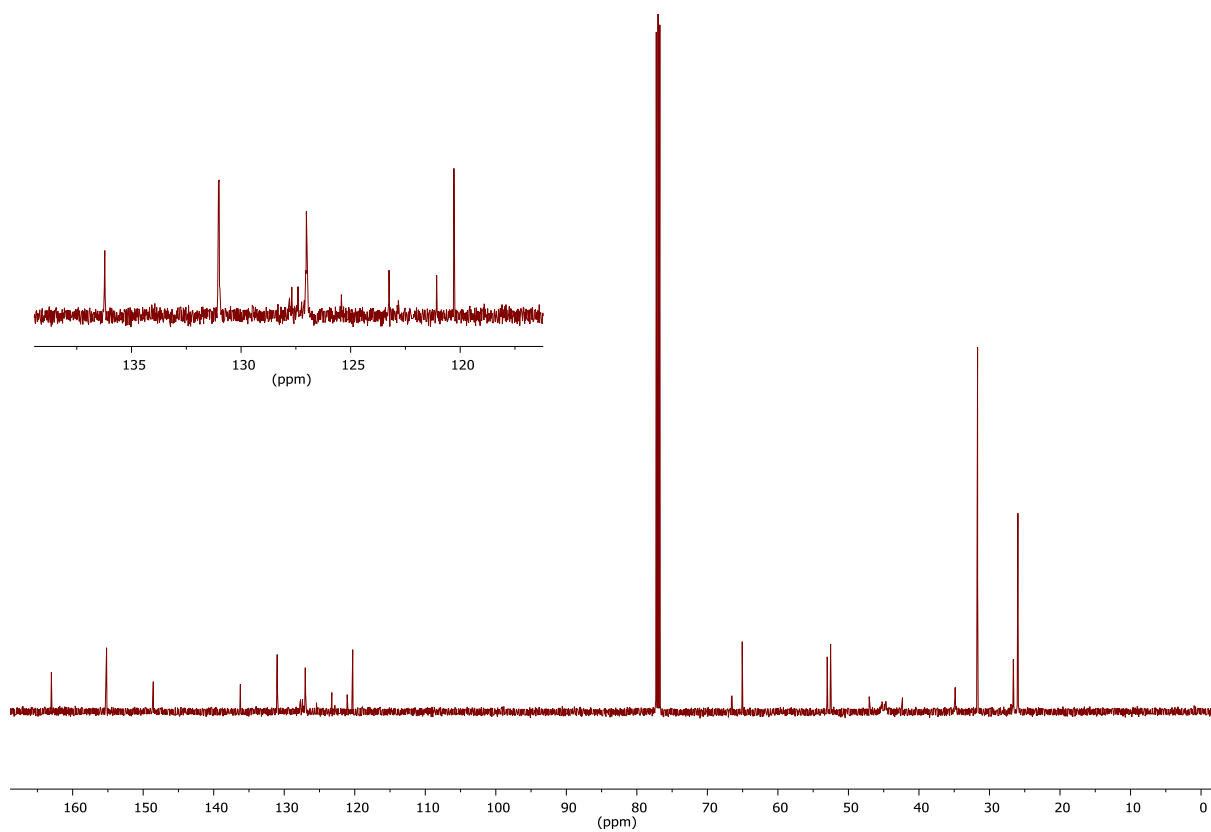

Figure S38B  $^{13}\text{C-NMR}$  (125 MHz) of **33b** in  $\text{CDCl}_3$ .

Sample Information

Sample Name :  
 Tray# : 1  
 Vial# : 17  
 Injection Volume : 5  
 Data File : AR79.lcd  
 Method File : MSP5-95\_30min\_1.0.lcm  
 Batch File : Batch170521\_2.lcb  
 Report Format File : Reportformat1.lsr  
 Date Acquired : 17.05.2021 21:28:51  
 Date Processed : 17.05.2021 21:58:53

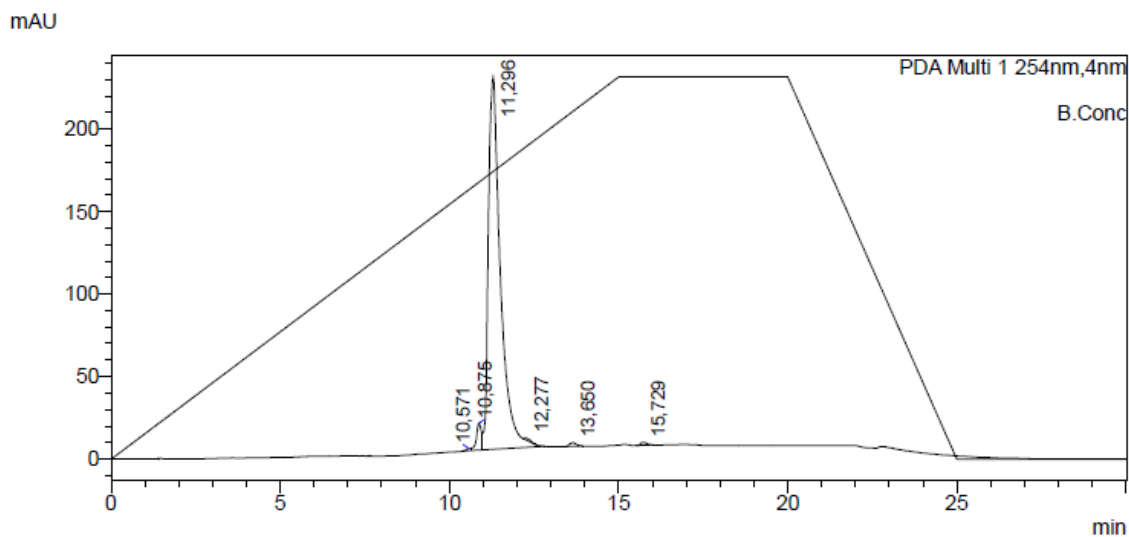

PDA Ch1 254nm

| Peak# | Ret. Time | Area    | Height | Area%   |
|-------|-----------|---------|--------|---------|
| 1     | 10,571    | 13749   | 1309   | 0,235   |
| 2     | 10,875    | 167610  | 16245  | 2,866   |
| 3     | 11,296    | 5599146 | 225774 | 95,754  |
| 4     | 12,277    | 13785   | 1212   | 0,236   |
| 5     | 13,650    | 30701   | 2196   | 0,525   |
| 6     | 15,729    | 22423   | 1809   | 0,383   |
| Total |           | 5847414 | 248545 | 100,000 |

Figure S38C HPLC chromatogram of **33b**.

# checkCIF/PLATON report

Structure factors have been supplied for datablock(s) ipds5968

THIS REPORT IS FOR GUIDANCE ONLY. IF USED AS PART OF A REVIEW PROCEDURE FOR PUBLICATION, IT SHOULD NOT REPLACE THE EXPERTISE OF AN EXPERIENCED CRYSTALLOGRAPHIC REFEREE.

No syntax errors found.      CIF dictionary      Interpreting this report

## Datablock: ipds5968

---

Bond precision:    C-C = 0.0023 A                      Wavelength=0.71073

Cell:                      a=6.4887(3)                      b=9.4396(5)                      c=16.7854(8)  
                                    alpha=80.347(4)                      beta=82.041(4)                      gamma=87.310(4)

Temperature:    170 K

|                | Calculated         | Reported           |
|----------------|--------------------|--------------------|
| Volume         | 1003.50(9)         | 1003.50(9)         |
| Space group    | P -1               | P -1               |
| Hall group     | -P 1               | -P 1               |
| Moiety formula | C18 H19 F3 N4 O5 S | C18 H19 F3 N4 O5 S |
| Sum formula    | C18 H19 F3 N4 O5 S | C18 H19 F3 N4 O5 S |
| Mr             | 460.43             | 460.43             |
| Dx,g cm-3      | 1.524              | 1.524              |
| Z              | 2                  | 2                  |
| Mu (mm-1)      | 0.228              | 0.228              |
| F000           | 476.0              | 476.0              |
| F000'          | 476.54             |                    |
| h,k,lmax       | 8,12,23            | 8,12,23            |
| Nref           | 5428               | 5359               |
| Tmin,Tmax      | 0.909,0.934        | 0.745,1.328        |
| Tmin'          | 0.894              |                    |

Correction method= # Reported T Limits: Tmin=0.745 Tmax=1.328  
AbsCorr = MULTI-SCAN

Data completeness= 0.987                      Theta(max)= 29.201

R(reflections)= 0.0476( 4802)                      wR2(reflections)= 0.1311( 5359)

S = 1.040                      Npar= 293

---

The following ALERTS were generated. Each ALERT has the format  
**test-name\_ALERT\_alert-type\_alert-level.**  
Click on the hyperlinks for more details of the test.



---

● **Alert level C**

|                   |                                                  |       |        |
|-------------------|--------------------------------------------------|-------|--------|
| PLAT906_ALERT_3_C | Large K Value in the Analysis of Variance .....  | 2.086 | Check  |
| PLAT911_ALERT_3_C | Missing FCF Refl Between Thmin & STh/L= 0.600    | 29    | Report |
| PLAT913_ALERT_3_C | Missing # of Very Strong Reflections in FCF .... | 9     | Note   |

---

● **Alert level G**

|                   |                                                  |       |        |
|-------------------|--------------------------------------------------|-------|--------|
| PLAT002_ALERT_2_G | Number of Distance or Angle Restraints on AtSite | 8     | Note   |
| PLAT003_ALERT_2_G | Number of Uiso or Uij Restrained non-H Atoms ... | 6     | Report |
| PLAT154_ALERT_1_G | The s.u.'s on the Cell Angles are Equal ..(Note) | 0.004 | Degree |
| PLAT171_ALERT_4_G | The CIF-Embedded .res File Contains EADP Records | 3     | Report |
| PLAT176_ALERT_4_G | The CIF-Embedded .res File Contains SADI Records | 3     | Report |
| PLAT186_ALERT_4_G | The CIF-Embedded .res File Contains ISOR Records | 1     | Report |
| PLAT230_ALERT_2_G | Hirshfeld Test Diff for F1' --C9 .               | 20.5  | s.u.   |
| PLAT230_ALERT_2_G | Hirshfeld Test Diff for F2' --C9 .               | 5.2   | s.u.   |
| PLAT230_ALERT_2_G | Hirshfeld Test Diff for F3' --C9 .               | 6.7   | s.u.   |
| PLAT242_ALERT_2_G | Low 'MainMol' Ueq as Compared to Neighbors of    | C9    | Check  |
| PLAT301_ALERT_3_G | Main Residue Disorder .....(Resd 1 )             | 10%   | Note   |
| PLAT860_ALERT_3_G | Number of Least-Squares Restraints .....         | 81    | Note   |
| PLAT910_ALERT_3_G | Missing # of FCF Reflection(s) Below Theta(Min). | 1     | Note   |
| PLAT912_ALERT_4_G | Missing # of FCF Reflections Above STh/L= 0.600  | 40    | Note   |
| PLAT933_ALERT_2_G | Number of OMIT Records in Embedded .res File ... | 2     | Note   |
| PLAT941_ALERT_3_G | Average HKL Measurement Multiplicity .....       | 2.7   | Low    |
| PLAT978_ALERT_2_G | Number C-C Bonds with Positive Residual Density. | 11    | Info   |

---

0 **ALERT level A** = Most likely a serious problem - resolve or explain  
0 **ALERT level B** = A potentially serious problem, consider carefully  
3 **ALERT level C** = Check. Ensure it is not caused by an omission or oversight  
17 **ALERT level G** = General information/check it is not something unexpected

1 ALERT type 1 CIF construction/syntax error, inconsistent or missing data  
8 ALERT type 2 Indicator that the structure model may be wrong or deficient  
7 ALERT type 3 Indicator that the structure quality may be low  
4 ALERT type 4 Improvement, methodology, query or suggestion  
0 ALERT type 5 Informative message, check

---

---

It is advisable to attempt to resolve as many as possible of the alerts in all categories. Often the minor alerts point to easily fixed oversights, errors and omissions in your CIF or refinement strategy, so attention to these fine details can be worthwhile. In order to resolve some of the more serious problems it may be necessary to carry out additional measurements or structure refinements. However, the purpose of your study may justify the reported deviations and the more serious of these should normally be commented upon in the discussion or experimental section of a paper or in the "special\_details" fields of the CIF. checkCIF was carefully designed to identify outliers and unusual parameters, but every test has its limitations and alerts that are not important in a particular case may appear. Conversely, the absence of alerts does not guarantee there are no aspects of the results needing attention. It is up to the individual to critically assess their own results and, if necessary, seek expert advice.

### **Publication of your CIF in IUCr journals**

A basic structural check has been run on your CIF. These basic checks will be run on all CIFs submitted for publication in IUCr journals (*Acta Crystallographica*, *Journal of Applied Crystallography*, *Journal of Synchrotron Radiation*); however, if you intend to submit to *Acta Crystallographica Section C* or *E* or *IUCrData*, you should make sure that full publication checks are run on the final version of your CIF prior to submission.

### **Publication of your CIF in other journals**

Please refer to the *Notes for Authors* of the relevant journal for any special instructions relating to CIF submission.

---

**PLATON version of 13/07/2021; check.def file version of 13/07/2021**

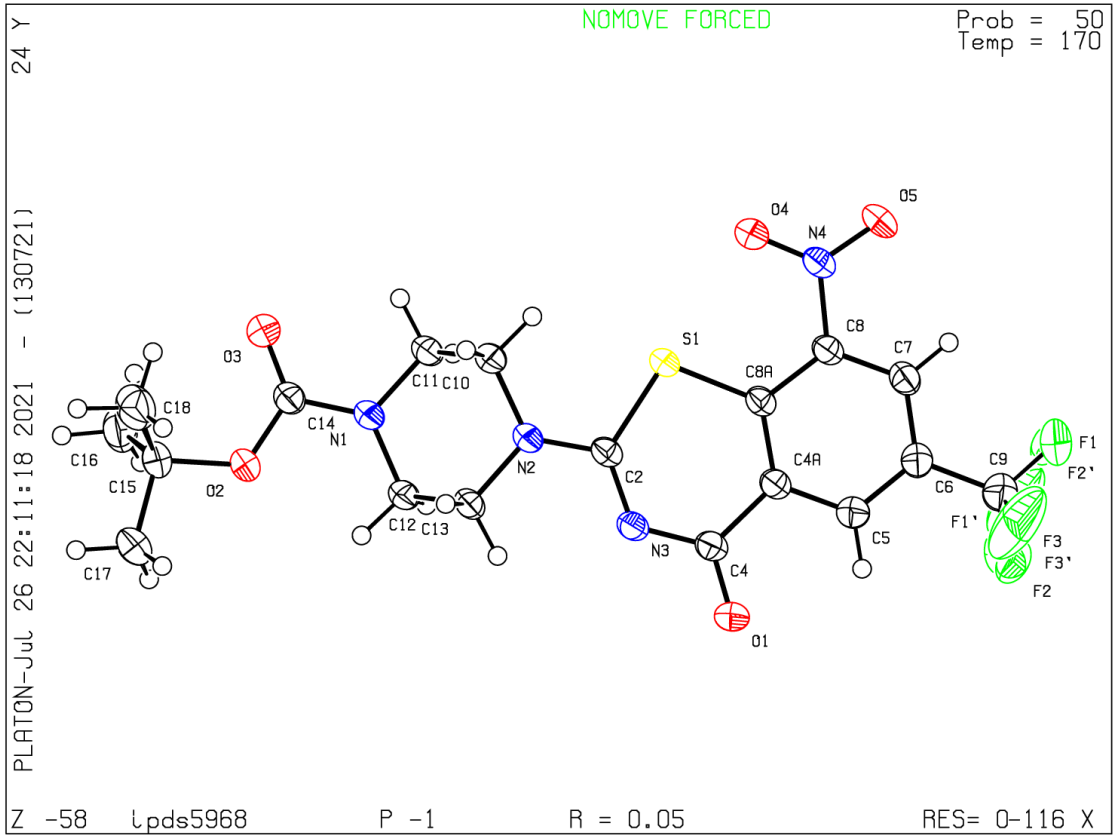

Supplement: CMDC-17-0-s001.pdf [file CMDC-17-0-s001.pdf]
